# Supplementary material
Source: publisher figshare collection journal article supplement (https://gsajournals.figshare.com/ndownloader/files/24121463)
Supplement: Supplementary file 1 [file 24121463]

Trans ID	CG Number	Gene	EGFR	EGFR Image	EGFR Metastasis	YKI	YKI Image	YKI Metastasis	SOCS	SOCS Image	Flybase URL	OMIM URL	Comments	Candidate Report
101930	CG5279	Rh5	Negative		-	Negative		-	Negative		http://flybase.org/reports/FBgn0014019.html	http://www.omim.org/entry/606665	Rhodopsin 5 (Rh5).
105624	CG42783	aPKC	Negative		-	Negative		-	Negative		http://flybase.org/reports/FBgn0261854.html	http://www.omim.org/entry/600539	atypical protein kinase C (aPKC). This line was positive with Yki in one set of crosses. It came negative in repeats.
107356	CG5436	Hsp68	Negative		-	Negative		-	Negative		http://flybase.org/reports/FBgn0001230.html	http://www.omim.org/entry/140550	Heat shock protein 68 (Hsp68).
104782	CG8418	Ric	Negative		-	Negative		-	Negative		http://flybase.org/reports/FBgn0265605.html	http://www.omim.org/entry/609592	Ras-related protein interacting with calmodulin (Ric).
107413	CG6964	Gug	Positive	http://www.iiserpune.ac.in/rnai/uploads/research/34/images/9cea5_Atrophin.jpg	No	Positive	http://www.iiserpune.ac.in/rnai/uploads/research/34/images/369c1_Atrophin.jpg	No	Negative		http://flybase.org/reports/FBgn0010825.html	http://www.omim.org/entry/605226	Grunge (Gug).
108171	CG12663	Ir7a	Negative		-	Negative		-	Negative		http://flybase.org/reports/FBgn0029961.html		ionotropic receptor 7a (Ir7a).
106484	CG15112	ena	Negative		-	Negative		-	Negative		http://flybase.org/reports/FBgn0000578.html	http://www.omim.org/entry/609061	enabled (ena).
103639	CG12333	CG12333	Negative		-	Negative		-	Negative		http://flybase.org/reports/FBgn0038617.html		Human WD repeat domain 37 (WDR37) ortholog. HGNC:31406.
107590	CG5336	Ced-12	Negative		-	Negative		-	Negative		http://flybase.org/reports/FBgn0032409.html	http://www.omim.org/entry/606420	Ced-12 (Ced-12).
106767	CG1775	Med	Negative		-	Negative		-	Negative		http://flybase.org/reports/FBgn0011655.html	http://www.omim.org/entry/600993	Medea (Med).
104102	CG2762	ush	Negative		-	Positive		No	Negative		http://flybase.org/reports/FBgn0003963.html	http://www.omim.org/entry/601950	u-shaped (ush).
110599	CG4254	tsr	Negative		-	Negative		-	Positive		http://flybase.org/reports/FBgn0011726.html	http://www.omim.org/entry/601443	twinstar (tsr).
110442	CG9272	CG9272	Negative		-	Negative		-	Negative		http://flybase.org/reports/FBgn0032907.html	http://www.omim.org/entry/602656
101848	CG9090	CG9090	Negative		-	Negative		-	Negative		http://flybase.org/reports/FBgn0034497.html	http://www.omim.org/entry/600370
110466	CG17743	pho	Negative		-	Negative		-	Negative		http://flybase.org/reports/FBgn0002521.html	http://www.omim.org/entry/600013	pleiohomeotic (pho).
108814	CG12919	egr	Negative		-	Negative		-	Negative		http://flybase.org/reports/FBgn0033483.html	http://www.omim.org/entry/300451	Eiger (egr).
103001	CG33336	p53	Negative		-	Positive		No	Negative		http://flybase.org/reports/FBgn0039044.html	http://www.omim.org/entry/601990	p53 (p53).
103624	CG4252	mei-41	Negative		-	Negative		-	Negative		http://flybase.org/reports/FBgn0004367.html	http://www.omim.org/entry/601215	meiotic 41 (mei-41).
107495	CG7594	Eig71Eh	Negative		-	Negative		-	Negative		http://flybase.org/reports/FBgn0014848.html		Eig71Eh (Eig71Eh). No human ortholog.
101524	CG4379	PKA	Positive	http://www.iiserpune.ac.in/rnai/uploads/research/49/images/45b14_101524KK.jpg	No	Positive	http://www.iiserpune.ac.in/rnai/uploads/research/49/images/5b5b1_KK101524.jpg	No	Negative		http://flybase.org/reports/FBgn0000273	http://omim.org/entry/176892	Protein kinase, cAMP-dependent, catalytic subunit 1 (Pka-C1).
101760	CG6844	nAChRalpha2	Positive	http://www.iiserpune.ac.in/rnai/uploads/research/50/images/018ff_KK101760.jpg	No	Negative		-	Negative		http://flybase.org/reports/FBgn0000039.html	http://www.omim.org/entry/118502	nicotinic Acetylcholine Receptor alpha2 (nAChRalpha2).
103412	CG12079	ND-30	Negative		-	Positive	http://www.iiserpune.ac.in/rnai/uploads/research/52/images/89546_KK103412.jpg	No	Negative		http://flybase.org/reports/FBgn0266582	http://www.omim.org/entry/603846	NADH dehydrogenase (ubiquinone) 30 kDa subunit (ND-30).	http://www.iiserpune.ac.in/rnai/uploads/research/52/pptx/d91c8_NDUFS3.pptx
104169	CG11228	hpo	Positive	http://www.iiserpune.ac.in/rnai/uploads/research/53/images/2e23a_KK104169.jpg	No	Positive	http://www.iiserpune.ac.in/rnai/uploads/research/53/images/888ea_Hippo.jpg	No	Negative		http://flybase.org/reports/FBgn0261456.html	http://www.omim.org/entry/605030	hippo (hpo). Human serine/threonine kinase 3 (STK3) ortholog. HGNC:11406.
105776	CG9609	CG9609	Negative		-	Negative		-	Negative		http://flybase.org/reports/FBgn0030787.html	http://www.omim.org/entry/600860
105120	CG10566	ICA69	Negative		-	Negative		-	Negative		http://flybase.org/reports/FBgn0037050.html		ICA69 (ICA69). Human islet cell autoantigen 1 like (ICA1L) ortholog. HGNC:14442.
103961	CG11821	cyp12a5	Negative		-	Negative		-	Negative		http://flybase.org/reports/FBgn0038680.html	http://www.omim.org/entry/606530	cyp12a5 (cyp12a5).
103979	CG33152	hbn	Negative		-	Negative		-	Negative		http://flybase.org/reports/FBgn0008636.html		homeobrain (hbn). Human Rhox homeobox family member 2B (RHOXF2B). HGNC:33519.
103976	CG1609	Gcn2	Negative		-	Negative		-	Negative		http://flybase.org/reports/FBgn0019990.html	http://www.omim.org/entry/609280	Gcn2 (Gcn2).
107326	CG3140	adk2	Negative		-	Negative		-	Negative		http://flybase.org/reports/FBgn0283494.html	http://www.omim.org/entry/103020	Adenylate kinase 2 (Adk2).
105116	CG6388	CG6388	Negative		-	Negative		-	Negative		http://flybase.org/reports/FBgn0032430.html	http://www.omim.org/entry/611669
110501	CG17905	ChLD3	Negative		-	Negative		-	Negative		http://flybase.org/reports/FBgn0032598.html		ChLD3 (ChLD3). No human ortholog.
106075	CG13473	CG13473	Negative		-	Negative		-	Negative		http://flybase.org/reports/FBgn0036442.html	http://www.omim.org/entry/187700
104522	CG5466	CG5466	Negative		-	Negative		-	Negative		http://flybase.org/reports/FBgn0038815.html	http://www.omim.org/entry/600188	Low DIOPT score.
105177	CG8359	hng2	Negative		-	Negative		-	Negative		http://flybase.org/reports/FBgn0037634.html		hinge2 (hng2). No human ortholog.
106178	CG12921	mRpL42	Negative		-	Negative		-	Negative		http://flybase.org/reports/FBgn0033480.html	http://www.omim.org/entry/611847	mitochondrial ribosomal protein L42 (mRpL42).
100266	CG2846	CG2846	Negative		-	Negative		-	Negative		http://flybase.org/reports/FBgn0014930.html	http://www.omim.org/entry/613010
100259	CG8933	exd	Negative		-	Negative		-	Negative		http://flybase.org/reports/FBgn0000611.html	http://www.omim.org/entry/176312	extradenticle (exd).
100242	CG12123	CG12123	Negative		-	Negative		-	Negative		http://flybase.org/reports/FBgn0030039.html		No human ortholog.
100361	CG12313	ttm2	Negative		-	Negative		-	Negative		http://flybase.org/reports/FBgn0035124.html	http://www.omim.org/entry/607381	tiny tim 2 (ttm2).
101869	CG7995	Gk2	Negative		-	Negative		-	Negative		http://flybase.org/reports/FBgn0035266.html	http://www.omim.org/entry/300474	Glycerol kinase 2 (Gk2).
100222	CG30467	CG30467	Negative		-	Negative		-	Negative		http://flybase.org/reports/FBgn0050467.html		Human serum amyloid A like 1 (SAAL1) ortholog. HGNC:25158.
100193	CG9512	CG9512	Negative		-	Negative		-	Negative		http://flybase.org/reports/FBgn0030593.html		Human choline dehydrogenase (CHDH) ortholog. HGNC:24288.
100245	CG2714	crm	Negative		-	Negative		-	Negative		http://flybase.org/reports/FBgn0000376.html		cramped (crm). Human cramped chromatin regulator homolog 1 (CRAMP1) ortholog. HGNC:14122.
101867	CG34100	mld	Negative		-	Negative		-	Negative		http://flybase.org/reports/FBgn0263490.html		molting defective (mld).
100310	CG9075	eIF-4a	Negative		-	Negative		-	Negative		http://flybase.org/reports/FBgn0001942.html	http://www.omim.org/entry/602641	eukaryotic translation initiation factor 4A (eIF4A).
100197	CG7586	mcr	Negative		-	Positive	http://www.iiserpune.ac.in/rnai/uploads/research/76/images/e4291_KK100197.jpg	No	Negative		http://flybase.org/reports/FBgn0267488	https://www.omim.org/entry/120700	macroglobulin complement-related (mcr).
100195	CG3680	HIPP1	Negative		-	Negative		-	Negative		http://flybase.org/reports/FBgn0037027.html	http://www.omim.org/entry/400016	HP1 and insulator partner protein 1 (HIPP1).
100244	CG13075	CG13075	Negative		-	Negative		-	Negative		http://flybase.org/reports/FBgn0036563.html		No human ortholog.
100229	CG8236	CG8236	Negative		-	Negative		-	Negative		http://flybase.org/reports/FBgn0037626.html		No human ortholog.
100271	CG11324	homer	Negative		-	Negative		-	Negative		http://flybase.org/reports/FBgn0025777.html	http://www.omim.org/entry/604799	homer (homer).
100265	CG18069	CaMKII	Negative		-	Negative		-	Negative		http://flybase.org/reports/FBgn0264607.html	http://www.omim.org/entry/607708	Calcium/calmodulin-dependent protein kinase II (CaMKII).
103522	CG6140	CG6140	Negative		-	Negative		-	Negative		http://flybase.org/reports/FBgn0036162.html	http://www.omim.org/entry/136850
101883	CG31133	slimp	Negative		-	Negative		-	Negative		http://flybase.org/reports/FBgn0051133.html	http://www.omim.org/entry/612804	Seryl-tRNA synthetase-like insect mitochondrial protein (Slimp).
100210	CG15188	Osi20	Negative		-	Negative		-	Negative		http://flybase.org/reports/FBgn0037430.html		Osiris20 (Osi20). No human ortholog.
100282	CG5935	Dek	Negative		-	Negative		-	Negative		http://flybase.org/reports/FBgn0026533.html	http://www.omim.org/entry/125264	Dek (Dek).
100236	CG15531	CG15531	Negative		-	Negative		-	Negative		http://flybase.org/reports/FBgn0039755.html	http://www.omim.org/entry/604031
100224	CG6830	CG6830	Negative		-	Negative		-	Negative		http://flybase.org/reports/FBgn0037934.html		No human ortholog.
101879	CG5346	CG5346	Negative		-	Negative		-	Negative		http://flybase.org/reports/FBgn0038981.html		No human ortholog.
103324	CG2062	Cyp4e1	Negative		-	Negative		-	Negative		http://flybase.org/reports/FBgn0015034.html	http://www.omim.org/entry/608614	Cytochrome P450-4e1 (Cyp4e1).
100262	CG5189	CG5189	Negative		-	Negative		-	Negative		http://flybase.org/reports/FBgn0034350.html	http://www.omim.org/entry/610389
100254	CG31544	CG31544	Negative		-	Negative		-	Negative		http://flybase.org/reports/FBgn0283627.html		Alias CR46300 and CG34023.
100263	CG9281	CG9281	Negative		-	Negative		-	Negative		http://flybase.org/reports/FBgn0030672.html	http://www.omim.org/entry/612510
106839	CG9220	CG9220	Negative		-	Negative		-	Negative		http://flybase.org/reports/FBgn0030662.html	http://www.omim.org/entry/608183
107598	CG4704	CG4704	Negative		-	Negative		-	Negative		http://flybase.org/reports/FBgn0039029.html	http://www.omim.org/entry/605084
109493	CG3595	sqh	Negative		-	Negative		-	Negative		http://flybase.org/reports/FBgn0003514.html	http://www.omim.org/entry/609905	spaghetti squash (sqh).
105414	CG9122	Trh	Negative		-	Negative		-	Negative		http://flybase.org/reports/FBgn0035187.html	http://www.omim.org/entry/191060	tryptophan hydroxylase (Trh).
107488	CG4521	mthl1	Negative		-	Negative		-	Negative		http://flybase.org/reports/FBgn0030766.html		methuselah-like 1 (mthl1).
108151	CG1954	Pkc98E	Negative		-	Negative		-	Negative		http://flybase.org/reports/FBgn0003093.html	http://www.omim.org/entry/176975	Protein C kinase 98E
108879	CG10118	ple	Negative		-	Negative		-	Negative		http://flybase.org/reports/FBgn0005626.html	http://www.omim.org/entry/191290	pale (ple).
107419	CG6944	Lam	Negative		-	Negative		-	Negative		http://flybase.org/reports/FBgn0002525.html	http://www.omim.org/entry/150341	Lamin (Lam).
101593	CG6965	mthl5	Negative		-	Negative		-	Negative		http://flybase.org/reports/FBgn0037960.html		methuselah-like 5 (mthl5).
107840	CG32775	GlcAT1	Negative		-	Negative		-	Negative		http://flybase.org/reports/FBgn0066114.html	http://www.omim.org/entry/606374	GlcAT1 (GlcAT1).
100010	CG7595	ck	Negative		-	Negative		-	Negative		http://flybase.org/reports/FBgn0000317.html	http://www.omim.org/entry/276903	crinkled (ck).
106812	CG16858	vkg	Negative		-	Positive		No	Negative		http://flybase.org/reports/FBgn0016075.html	http://www.omim.org/entry/120120	viking (vkg).
101029	CG42349	Pkcdelta	Negative		-	Negative		-	Negative		http://flybase.org/reports/FBgn0259680.html	http://www.omim.org/entry/176977	Protein kinase C delta (Pkcdelta).
105609	CG7724	CG7724	Negative		-	Negative		-	Negative		http://flybase.org/reports/FBgn0036698.html	http://www.omim.org/entry/109715
110285	CG3298	JhI1	Negative		-	Negative		-	Negative		http://flybase.org/reports/FBgn0028426.html	http://www.omim.org/entry/605367	Juvenile hormone-inducible protein 1 (JhI-1).
110275	CG5248	loco	Negative		-	Negative		-	Negative		http://flybase.org/reports/FBgn0020278.html	http://www.omim.org/entry/602512	locomotion defects (loco).
110758	CG31957	CG31957	Negative		-	Negative		-	Negative		http://flybase.org/reports/FBgn0051957.html		Human eukaryotic translation initiation factor 1A domain containing (EIF1AD) ortholog. HGNC:28147.
100971	CG2711	dwg	Negative		-	Negative		-	Negative		http://flybase.org/reports/FBgn0000520.html	http://www.omim.org/entry/600999	deformed wings (dwg).
103834	CG5028	CG5028	Negative		-	Negative		-	Negative		http://flybase.org/reports/FBgn0039358.html	http://www.omim.org/entry/300089
102247	CG1318	Hexo1	Negative		-	Negative		-	Negative		http://flybase.org/reports/FBgn0041630.html	http://www.omim.org/entry/606873	Hexosaminidase 1 (Hexo1).
104413	CG9730	mRpL21	Negative		-	Negative		-	Negative		http://flybase.org/reports/FBgn0036853.html	http://www.omim.org/entry/611834	mitochondrial ribosomal protein L21 (mRpL21).
109703	CG8457	cyp6t3	Negative		-	Negative		-	Negative		http://flybase.org/reports/FBgn0033697.html	http://www.omim.org/entry/274180	cyp6t3 (cyp6t3).
101270	CG7024	CG7024	Negative		-	Negative		-	Negative		http://flybase.org/reports/FBgn0029722.html	http://www.omim.org/entry/179061
103827	CG8806	prel	Negative		-	Negative		-	Negative		http://flybase.org/reports/FBgn0033413.html	http://www.omim.org/entry/605733	preli-like (prel).
101099	CG14680	cyp12e1	Negative		-	Negative		-	Negative		http://flybase.org/reports/FBgn0037817.html	http://www.omim.org/entry/609506	Cyp12e1 (Cyp12e1).
101164	CG34414	spri	Negative		-	Negative		-	Negative		http://flybase.org/reports/FBgn0085443.html	http://www.omim.org/entry/610222	sprint (spri).
100906	CG5210	Idgf6	Negative		-	Negative		-	Negative		http://flybase.org/reports/FBgn0013763.html	http://www.omim.org/entry/600031	Imaginal disc growth factor 6 (Idgf6).
101079	CG13263	Cyt-c-d	Negative		-	Negative		-	Negative		http://flybase.org/reports/FBgn0086907.html	http://www.omim.org/entry/123970	Cytochrome c distal (Cyt-c-d).
100779	CG3052	HLH4c	Negative		-	Negative		-	Negative		http://flybase.org/reports/FBgn0011277.html	http://www.omim.org/entry/162361	Helix loop helix protein 4C (HLH4c).
108122	CG8651	trx	Negative		-	Negative		-	Negative		http://flybase.org/reports/FBgn0003862.html	http://www.omim.org/entry/159555	trithorax (trx).
110704	CG6192	Reps	Negative		-	Negative		-	Negative		http://flybase.org/reports/FBgn0032341.html	http://www.omim.org/entry/300317	RALBP1 associated Eps domain containing (Reps).
103829	CG14290	Mpc1	Negative		-	Negative		-	Negative		http://flybase.org/reports/FBgn0038662.html	http://www.omim.org/entry/614738	Mitochondrial pyruvate carrier (Mpc1).
110073	CG3024	torsin	Negative		-	Negative		-	Negative		http://flybase.org/reports/FBgn0025615.html	http://www.omim.org/entry/605204	Torsin (Torsin).
108775	CG18559	Cyp309a2	Negative		-	Negative		-	Negative		http://flybase.org/reports/FBgn0041337.html	http://www.omim.org/entry/606534	Cyp309a2 (Cyp309a2).
108208	CG4063	ebi	Negative		-	Negative		-	Negative		http://flybase.org/reports/FBgn0263933.html	http://www.omim.org/entry/300196	ebi (ebi).
106637	CG4685	Ssadh	Negative		-	Negative		-	Negative		http://flybase.org/reports/FBgn0039349.html	http://www.omim.org/entry/610045	Succinic semialdehyde dehydrogenase (Ssadh).
110741	CG8269	DCTN2-p50	Negative		-	Negative		-	Negative		http://flybase.org/reports/FBgn0021825.html	http://www.omim.org/entry/607376	Dynactin 2, p50 subunit (DCTN2-p50).
104393	CG11202	org-1	Negative		-	Negative		-	Negative		http://flybase.org/reports/FBgn0021767.html	http://www.omim.org/entry/602054	optomotor-blind-related-gene-1 (org-1).
107193	CG4143	mbf1	Negative		-	Negative		-	Negative		http://flybase.org/reports/FBgn0262732.html	http://www.omim.org/entry/605107	multiprotein bridging factor 1 (mbf1).
110187	CG1951	CG1951	Negative		-	Negative		-	Negative		http://flybase.org/reports/FBgn0039623.html	http://www.omim.org/entry/616365
107820	CG12262	CG12262	Negative		-	Negative		-	Negative		http://flybase.org/reports/FBgn0035811.html	http://www.omim.org/entry/607008
100051	CG17121	CG17121	Negative		-	Negative		-	Negative		http://flybase.org/reports/FBgn0039043.html	http://www.omim.org/entry/608989
100106	CG4930	EndoGI	Negative		-	Negative		-	Negative		http://flybase.org/reports/FBgn0028515.html		Endonuclease G inhibitor (EndoGI).
100608	CG3139	Syt1	Negative		-	Negative		-	Negative		http://flybase.org/reports/FBgn0004242.html	http://www.omim.org/entry/185605	Synaptotagmin 1 (Syt1).
100072	CG43386	CG43386	Negative		-	Negative		-	Negative		http://flybase.org/reports/FBgn0263216.html		No human ortholog.
100034	CG5304	dmGlut	Negative		-	Negative		-	Negative		http://flybase.org/reports/FBgn0010497.html	http://www.omim.org/entry/611034	Dietary and metabolic glutamate transporter (dmGlut).
100024	CG14085	CG14085	Negative		-	Negative		-	Negative		http://flybase.org/reports/FBgn0036859.html	http://www.omim.org/entry/617266
100006	CG33172	CG33172	Negative		-	Negative		-	Negative		http://flybase.org/reports/FBgn0053172.html	http://www.omim.org/entry/606031
100090	CG5842	nan	Negative		-	Negative		-	Negative		http://flybase.org/reports/FBgn0036414.html	http://www.omim.org/entry/606679	nanchung (nan).
100069	CG2053	CG2053	Negative		-	Negative		-	Negative		http://flybase.org/reports/FBgn0039887.html	http://www.omim.org/entry/612054
100053	CG6149	CG6149	Negative		-	Negative		-	Negative		http://flybase.org/reports/FBgn0036158.html	http://www.omim.org/entry/608514
106092	CG8224	babo	Negative		-	Negative		-	Negative		http://flybase.org/reports/FBgn0011300.html	http://www.omim.org/entry/190181	baboon (babo).
106095	CG8844	ND-PDSW	Negative		-	Negative		-	Negative		http://flybase.org/reports/FBgn0021967.html	http://www.omim.org/entry/603843	NADH dehydrogenase (ubiquinone) PDSW subunit (ND-PDSW).
100440	CG9964	Cyp309a1	Negative		-	Negative		-	Negative		http://flybase.org/reports/FBgn0031432.html	http://www.omim.org/entry/606534	Cyp309a1 (Cyp309a1).
100424	CG8091	Dronc	Negative		-	Negative		-	Negative		http://flybase.org/reports/FBgn0026404.html	http://www.omim.org/entry/602664	Death regulator Nedd2-like caspase (Dronc).
100499	CG2052	dati	Negative		-	Negative		-	Negative		http://flybase.org/reports/FBgn0262636.html		datilografo (dati).
109217	CG34063	mt:ND2	Negative		-	Negative		-	Negative		http://flybase.org/reports/FBgn0013680.html	http://www.omim.org/entry/516001	mitochondrial NADH-ubiquinone oxidoreductase chain 2 (mt:ND2).
100751	CG11274	SRm160	Negative		-	Negative		-	Negative		http://flybase.org/reports/FBgn0036340.html	http://www.omim.org/entry/605975	SRm160 (SRm160).
106701	CG4013	Smr	Negative		-	Negative		-	Negative		http://flybase.org/reports/FBgn0265523.html	http://www.omim.org/entry/600849	Smrter (Smr).
108396	CG4547	Atx-1	Negative		-	Negative		-	Negative		http://flybase.org/reports/FBgn0029907.html	http://www.omim.org/entry/601556	Ataxin 1 (Atx-1).
110341	CG5495	Txl	Negative		-	Negative		-	Negative		http://flybase.org/reports/FBgn0035631.html	http://www.omim.org/entry/603049	Thioredoxin-like (Txl).
107979	CG34372	CG34372	Negative		-	Positive		No	Negative		http://flybase.org/reports/FBgn0264339.html	http://www.omim.org/entry/614573
103572	CG8385	Arf79F	Negative		-	Negative		-	Negative		http://flybase.org/reports/FBgn0010348.html	http://www.omim.org/entry/103180	ADP ribosylation factor at 79F (Arf79F).
100421	CG5732	Gld2	Negative		-	Negative		-	Negative		http://flybase.org/reports/FBgn0038934.html	http://www.omim.org/entry/614121	GLD2 poly(A) polymerase (Gld2).
107368	CG11416	uri	Negative		-	Negative		-	Negative		http://flybase.org/reports/FBgn0035025.html	http://www.omim.org/entry/603494	unconventional prefoldin RPB5 interactor (uri).
107227	CG7175	mTerf5	Negative		-	Negative		-	Negative		http://flybase.org/reports/FBgn0038584.html		mitochondrial transcription termination factor 5 (mTerf5). No human ortholog.
109821	CG18362	Mondo	Negative		-	Negative		-	Negative		http://flybase.org/reports/FBgn0032940.html	http://www.omim.org/entry/608090	Mondo (Mondo).
108400	CG11290	enok	Negative		-	Negative		-	Negative		http://flybase.org/reports/FBgn0034975.html	http://www.omim.org/entry/601408	enoki mushroom (enok).
109828	CG8301	CG8301	Negative		-	Negative		-	Negative		http://flybase.org/reports/FBgn0037717.html
110354	CG1965	CG1965	Negative		-	Negative		-	Negative		http://flybase.org/reports/FBgn0037466.html		Human PAX3 and PAX7 binding protein 1 (PAXBP1) ortholog.
109248	CG33503	Cyp12d1-d	Negative		-	Negative		-	Negative		http://flybase.org/reports/FBgn0053503.html	http://www.omim.org/entry/126065	Cyp12d1-d (Cyp12d1-d).
100395	CG8573	su(Hw)	Negative		-	Negative		-	Negative		http://flybase.org/reports/FBgn0003567.html		suppressor of Hairy wing (su(Hw)).
109880	CG18582	mbt	Negative		-	Negative		-	Negative		http://flybase.org/reports/FBgn0025743.html	http://www.omim.org/entry/605451	mushroom bodies tiny (mbt).
106779	CG11466	Cyp9f2	Negative		-	Negative		-	Negative		http://flybase.org/reports/FBgn0038037.html	http://www.omim.org/entry/124010	Cyp9f2 (Cyp9f2).
106677	CG7488	CG7488	Negative		-	Negative		-	Negative		http://flybase.org/reports/FBgn0038106.html	http://www.omim.org/entry/607435
109771	CG8587	Cyp301a1	Negative		-	Negative		-	Negative		http://flybase.org/reports/FBgn0033753.html	http://www.omim.org/entry/606530	Cyp301a1 (Cyp301a1).
107898	CG6802	Cyp313a4	Negative		-	Negative		-	Negative		http://flybase.org/reports/FBgn0038076.html	http://www.omim.org/entry/107910	Cyp313a4 (Cyp313a4).
100598	CG3578	bi	Negative		-	Positive		No	Negative		http://flybase.org/reports/FBgn0000179.html	http://www.omim.org/entry/600747	bifid (bi). Alias optomotor blind (omb).	http://www.iiserpune.ac.in/rnai/uploads/research/173/pptx/ec10c_CG3578_omb.pptx
100507	CG13279	Cyt-b5-r	Negative		-	Negative		-	Negative		http://flybase.org/reports/FBgn0000406.html	http://www.omim.org/entry/606148	Cytochrome b5-related (Cyt-b5-r).
109807	CG12220	mRpL32	Negative		-	Positive		No	Negative		http://flybase.org/reports/FBgn0039835.html	http://www.omim.org/entry/611839	mitochondrial ribosomal protein L32 (mRpL32).	http://www.iiserpune.ac.in/rnai/uploads/research/174/pptx/ce5dd_CG12220_mRpL32.pptx
100762	CG11502	svp	Negative		-	Positive		No	Negative		http://flybase.org/reports/FBgn0003651.html	http://www.omim.org/entry/132890	seven up (svp).
101749	CG1577	mRpL52	Negative		-	Negative		-	Negative		http://flybase.org/reports/FBgn0033208.html	http://www.omim.org/entry/611856	mitochondrial ribosomal protein L52 (mRpL52). Shows overgrowth but tumor size less than positive control.
103577	CG4625	Dhap-at	Negative		-	Negative		-	Negative		http://flybase.org/reports/FBgn0040212.html	http://www.omim.org/entry/602744	Dihydroxyacetone phosphate acyltransferase (Dhap-at).
105321	CG8693	Mal-A4	Negative		-	Negative		-	Negative		http://flybase.org/reports/FBgn0033294.html	http://www.omim.org/entry/104614	Maltase A4 (Mal-A4).
104562	CG9946	eIF-2alpha	Negative		-	Negative		-	Negative		http://flybase.org/reports/FBgn0261609.html	http://www.omim.org/entry/603907	eukaryotic translation Initiation Factor 2alpha (eIF-2alpha).
104680	CG3001	Hex-A	Negative		-	Negative		-	Negative		http://flybase.org/reports/FBgn0001186.html	http://www.omim.org/entry/138079	Hexokinase A (Hex-A).
107476	CG14667	CG14667	Negative		-	Negative		-	Negative		http://flybase.org/reports/FBgn0037317.html
106429	CG31013	CG31013	Negative		-	Negative		-	Negative		http://flybase.org/reports/FBgn0051013.html	http://www.omim.org/entry/176710
106244	CG3709	CG3709	Negative		-	Negative		-	Negative		http://flybase.org/reports/FBgn0031227.html	http://www.omim.org/entry/612787
100587	CG1007	emc	Negative		-	Negative		-	Negative		http://flybase.org/reports/FBgn0000575.html	http://www.omim.org/entry/600581	extra macrochaetae (emc).
110517	CG12399	Mad	Negative		-	Negative		-	Negative		http://flybase.org/reports/FBgn0011648.html	http://www.omim.org/entry/601595	Mothers against dpp (Mad).
110397	CG5586	Tusp	Negative		-	Negative		-	Negative		http://flybase.org/reports/FBgn0039530.html		Tusp (Tusp). Human tubby like protein 4 (TULP4) ortholog. HGNC:15530.
110572	CG7643	Msp1	Negative		-	Negative		-	Negative		http://flybase.org/reports/FBgn0000063.html	http://www.omim.org/entry/604092	Monopolar spindle 1 (Msp1).
108832	CG8887	ash1	Negative		-	Negative		-	Negative		http://flybase.org/reports/FBgn0005386.html	http://www.omim.org/entry/607999	absent, small, or homeotic discs 1 (ash1).
103352	CG4202	Sas10	Negative		-	Negative		-	Negative		http://flybase.org/reports/FBgn0029755.html	http://www.omim.org/entry/611614	Something about silencing 10 (Sas10).
105585	CG17031	Ref2	Negative		-	Negative		-	Negative		http://flybase.org/reports/FBgn0032439.html	http://www.omim.org/entry/604171	RNA and export factor binding protein 2 (Ref2).
107051	CG30011	gem	Negative		-	Positive		No	Negative		http://flybase.org/reports/FBgn0050011.html	http://www.omim.org/entry/189889	gemini (gem).
106754	CG15440	CG15440	Negative		-	Negative		-	Negative		http://flybase.org/reports/FBgn0031607.html		Human tRNA selenocysteine 1 associated protein 1 (TRNAU1AP) ortholog.
101512	CG6103	CrebB	Negative		-	Positive		No	Negative		http://flybase.org/reports/FBgn0265784.html	http://www.omim.org/entry/123810	Cyclic-AMP response element binding protein B (CrebB).
100969	CG33957	plp	Negative		-	Negative		-	Negative		http://flybase.org/reports/FBgn0086690.html	http://www.omim.org/entry/605925	Pericentrin-like protein (plp).
100002	CG3936	Notch	Negative		-	Negative		-	Negative		http://flybase.org/reports/FBgn0004647.html	http://www.omim.org/entry/190198	Notch (Notch).
100573	CG8978	Arpc1	Negative		-	Negative		-	Negative		http://flybase.org/reports/FBgn0001961.html	http://www.omim.org/entry/604220	Actin-related protein 2/3 complex, subunit 1 (Arpc1).
101858	CG30445	Tdc1	Negative		-	Negative		-	Negative		http://flybase.org/reports/FBgn0259977.html	http://www.omim.org/entry/107930	Tyrosine decarboxylase 1 (Tdc1).
106642	CG9375	Ras85D	Negative		-	Negative		-	Negative		http://flybase.org/reports/FBgn0003205.html	http://www.omim.org/entry/190070	Ras oncogene at 85D (Ras85D).
102076	CG5738	lolal	Negative		-	Negative		-	Negative		http://flybase.org/reports/FBgn0022238.html	http://www.omim.org/entry/604084	lola-like (lolal). Low homology score.
101213	CG4740	AttC	Negative		-	Negative		-	Negative		http://flybase.org/reports/FBgn0041579.html		Attacin-C (AttC).
108679	CG34403	pan	Negative		-	Negative		-	Negative		http://flybase.org/reports/FBgn0085432.html	http://www.omim.org/entry/602228	pangolin (pan).
105119	CG17712	CG17712	Negative		-	Negative		-	Negative		http://flybase.org/reports/FBgn0027597.html		Human glucose-fructose oxidoreductase domain containing 1 (GFOD1) ortholog. HGNC:21096.
107332	CG4337	mtSSB	Negative		-	Negative		-	Negative		http://flybase.org/reports/FBgn0010438.html	http://www.omim.org/entry/600439	mitochondrial single stranded DNA-binding protein (mtSSB).
103338	CG2135	betaGlu	Negative		-	Negative		-	Negative		http://flybase.org/reports/FBgn0039874.html	http://www.omim.org/entry/611499	beta glucuronidase (betaGlu).
110410	CG9323	CG9323	Negative		-	Negative		-	Negative		http://flybase.org/reports/FBgn0032883.html	http://www.omim.org/entry/612767
105107	CG3249	spoon	Negative		-	Negative		-	Negative		http://flybase.org/reports/FBgn0263987.html	http://www.omim.org/entry/602449	spoonbill (spoon).
106119	CG17603	Taf1	Negative		-	Negative		-	Negative		http://flybase.org/reports/FBgn0010355.html	http://www.omim.org/entry/607798	TBP-associated factor 1 (Taf1).
106175	CG6007	GatA	Negative		-	Negative		-	Negative		http://flybase.org/reports/FBgn0260779.html	http://www.omim.org/entry/617209	Glutamyl-tRNA amidotransferase, subunit A (GatA).
103423	CG5045	CG5045	Negative		-	Negative		-	Negative		http://flybase.org/reports/FBgn0032229.html	http://www.omim.org/entry/601119
105768	CG4866	CG4866	Negative		-	Negative		-	Negative		http://flybase.org/reports/FBgn0034232.html	http://www.omim.org/entry/612980
103926	CG5546	MED19	Negative		-	Negative		-	Positive		http://flybase.org/reports/FBgn0036761.html	http://omim.org/entry/612385	Mediator complex subunit 19 (MED19).
103232	CG11085	CG11085	Negative		-	Negative		-	Negative		http://flybase.org/reports/FBgn0030408.html	http://www.omim.org/entry/604823
103231	CG6570	ladybird late	Negative		-	Negative		-	Negative		http://flybase.org/reports/FBgn0008651.html	http://www.omim.org/entry/604255	ladybird late (lbl).
103426	CG1107	aux	Negative		-	Negative		-	Negative		http://flybase.org/reports/FBgn0037218.html	http://www.omim.org/entry/602052	auxilin (aux).
105729	CG9353	mRpL 54	Negative		-	Negative		-	Negative		http://flybase.org/reports/FBgn0034579.html	http://www.omim.org/entry/611858	mitochondrial ribosomal protein L54 (mRpL 54).
107304	CG3780	Spx	Negative		-	Negative		-	Positive		http://flybase.org/reports/FBgn0015818.html	http://omim.org/entry/605593	Spliceosomal protein on the X (Spx).
107206	CG3071	CG3071	Negative		-	Positive		No	Negative		http://flybase.org/reports/FBgn0023527.html	http://www.omim.org/entry/616194
105771	CG12531	CG12531	Negative		-	Negative		-	Negative		http://flybase.org/reports/FBgn0031064.html	http://www.omim.org/entry/615720
107869	CG10431	CG10431	Negative		-	Positive		No	Negative		http://flybase.org/reports/FBgn0032730.html	http://www.omim.org/entry/609518
105662	CG7494	mRpL1	Negative		-	Negative		-	Negative		http://flybase.org/reports/FBgn0037566.html	http://www.omim.org/entry/611821	mitochondrial ribosomal protein L1 (mRpL1).
101023	CG15077	Cyp12b2	Negative		-	Negative		-	Negative		http://flybase.org/reports/FBgn0034387.html	http://www.omim.org/entry/609506	Cyp12b2 (Cyp12b2).
107069	CG4237	ArfGAP1	Negative		-	Negative		-	Negative		http://flybase.org/reports/FBgn0020655.html	http://www.omim.org/entry/608377	ADP-ribosylation factor GTPase activating protein 1 (ArfGAP1).
107050	CG4647	mRpL49	Negative		-	Negative		-	Negative		http://flybase.org/reports/FBgn0030433.html	http://www.omim.org/entry/606866	mitochondrial ribosomal protein L49 (mRpL49).
107086	CG3910	mtTFB2	Negative		-	Negative		-	Negative		http://flybase.org/reports/FBgn0037778.html	http://www.omim.org/entry/607055	mitochondrial transcription factor B2 (mtTFB2).
108259	CG10603	mRpL13	Negative		-	Negative		-	Negative		http://flybase.org/reports/FBgn0032720.html	http://www.omim.org/entry/610200	mitochondrial ribosomal protein L13 (mRpL13).
108212	CG15191	e(y)2	Negative		-	Negative		-	Negative		http://flybase.org/reports/FBgn0000618.html		enhancer of yellow 2 (e(y)2). Human ENY2, transcription and export complex 2 subunit (ENY2) ortholog.
110327	CG13922	mRpL46	Negative		-	Negative		-	Negative		http://flybase.org/reports/FBgn0035272.html	http://www.omim.org/entry/611851	mitochondrial ribosomal protein L46 (mRpL46).
106006	CG3597	CG3597	Negative		-	Negative		-	Negative		http://flybase.org/reports/FBgn0031417.html	http://www.omim.org/entry/606377
107827	CG32708	CG32708	Negative		-	Negative		-	Negative		http://flybase.org/reports/FBgn0052708.html		Human activator of basal transcription 1 (ABT1) ortholog. HGNC:17369.
105678	CG9015	en	Negative		-	Negative		-	Negative		http://flybase.org/reports/FBgn0000577.html	http://www.omim.org/entry/131310	engrailed (en).
109612	CG13624	REPTOR	Negative		-	Negative		-	Negative		http://flybase.org/reports/FBgn0039209.html	http://www.omim.org/entry/617109	Repressed by TOR (REPTOR).
107091	CG8961	tef	Negative		-	Negative		-	Negative		http://flybase.org/reports/FBgn0086350.html		teflon (tef). No human ortholog.
100215	CG5518	sda	Negative		-	Negative		-	Negative		http://flybase.org/reports/FBgn0015541.html	http://www.omim.org/entry/138297	slamdance (sda).
104926	CG11294	CG11294	Negative		-	Negative		-	Negative		http://flybase.org/reports/FBgn0030058.html
106601	CG8478	CG8478	Negative		-	Negative		-	Negative		http://flybase.org/reports/FBgn0037746.html
104963	CG33323	Fer1	Negative		-	Negative		-	Negative		http://flybase.org/reports/FBgn0037475.html	http://www.omim.org/entry/607194	48 related 1 (Fer1).
107794	CG3132	Ect3	Negative		-	Negative		-	Negative		http://flybase.org/reports/FBgn0260746.html		Ectoderm-expressed 3 (Ect3). Human galactosidase beta 1 like (GLB1L) ortholog. HGNC:28129.
108250	CG6144	CG6144	Negative		-	Negative		-	Negative		http://flybase.org/reports/FBgn0032259.html	http://www.omim.org/entry/613304
108328	CG18476	CG18476	Negative		-	Negative		-	Negative		http://flybase.org/reports/FBgn0037931.html		Human zinc finger protein 658B (pseudogene) (ZNF658B) ortholog. HGNC:32033.
105995	CG12373	mRpL18	Negative		-	Negative		-	Negative		http://flybase.org/reports/FBgn0026741.html	http://www.omim.org/entry/611831	mitochondrial ribosomal protein L18 (mRpL18).
106645	CG5753	stau	Negative		-	Negative		-	Negative		http://flybase.org/reports/FBgn0003520.html	http://www.omim.org/entry/605920	staufen (stau).
107813	CG4599	Tpr2	Negative		-	Positive	http://www.iiserpune.ac.in/rnai/uploads/research/252/images/df4e0_YKI_KK107813.jpg	No	Negative		http://flybase.org/reports/FBgn0032586.html	http://omim.org/entry/601964	Tetratricopeptide repeat protein 2 (Tpr2)
108221	CG5695	jar	Negative		-	Negative		-	Negative		http://flybase.org/reports/FBgn0011225.html	http://www.omim.org/entry/600970	jaguar (jar).
103145	CG5714	ecd	Negative		-	Negative		-	Negative		http://flybase.org/reports/FBgn0000543.html	http://www.omim.org/entry/616464	ecdysoneless (ecd).
108239	CG11988	neur	Negative		-	Positive		No	Negative		http://flybase.org/reports/FBgn0002932.html	http://www.omim.org/entry/615893	neuralized (neur).
107828	CG9008	CG9008	Negative		-	Negative		-	Negative		http://flybase.org/reports/FBgn0028540.html		No human ortholog.
101146	CG5182	Pk34A	Negative		-	Negative		-	Negative		http://flybase.org/reports/FBgn0028410.html	http://www.omim.org/entry/606784	Pk34A (Pk34A).
104922	CG5093	Doc3	Negative		-	Negative		-	Negative		http://flybase.org/reports/FBgn0035954.html	http://www.omim.org/entry/602427	Dorsocross3 (Doc3).
107151	CG8208	MBD-like	Negative		-	Negative		-	Negative		http://flybase.org/reports/FBgn0027950.html	http://www.omim.org/entry/603547	Methyl-CpG binding domain protein-like (MBD-like).
108854	CG3766	scat	Negative		-	Negative		-	Negative		http://flybase.org/reports/FBgn0011232.html	http://www.omim.org/entry/614633	scattered (scat).
109663	CG17342	Lk6	Negative		-	Negative		-	Negative		http://flybase.org/reports/FBgn0017581.html	http://www.omim.org/entry/606724	Lk6 kinase (Lk6).
108317	CG42708	GLS	Negative		-	Negative		-	Negative		http://flybase.org/reports/FBgn0261625.html	http://www.omim.org/entry/138280	Glutaminase (GLS).
108325	CG1600	Drat	Negative		-	Negative		-	Negative		http://flybase.org/reports/FBgn0033188.html		Death resistor Adh domain containing target (Drat).
106650	CG5703	ND-24	Negative		-	Negative		-	Negative		http://flybase.org/reports/FBgn0030853.html	http://www.omim.org/entry/600532	NADH dehydrogenase (ubiquinone) 24 kDa subunit (ND-24).
105019	CG15504	dmrt99B	Negative		-	Negative		-	Negative		http://flybase.org/reports/FBgn0039683.html	http://www.omim.org/entry/614804	doublesex-Mab related 99B (dmrt99B).
105687	CG2262	Smox	Negative		-	Negative		-	Negative		http://flybase.org/reports/FBgn0025800.html	http://www.omim.org/entry/603109	Smad on X (Smox).
109666	CG3534	CG3534	Negative		-	Negative		-	Negative		http://flybase.org/reports/FBgn0038463.html	http://www.omim.org/entry/604049
108074	CG6535	tefu	Negative		-	Negative		-	Negative		http://flybase.org/reports/FBgn0045035.html	http://www.omim.org/entry/607585	telomere fusion (tefu).
105617	CG5826	Prx3	Negative		-	Negative		-	Negative		http://flybase.org/reports/FBgn0038519.html	http://www.omim.org/entry/604769	Peroxiredoxin 3 (Prx3).
103548	CG11759	Kap3	Negative		-	Positive		No	Negative		http://flybase.org/reports/FBgn0028421.html	http://www.omim.org/entry/601836	Kinesin associated protein 3 (Kap3 ).
107130	CG10079	Egfr	Negative		-	Negative		-	Positive		http://flybase.org/reports/FBgn0003731.html	http://www.omim.org/entry/600543	Epidermal growth factor receptor (Egfr).
104675	CG9774	Rok	Negative		-	Negative		-	Negative		http://flybase.org/reports/FBgn0026181.html	http://www.omim.org/entry/604002	Rho kinase (Rok).
109491	CG3619	Dl	Negative		-	Negative		-	Negative		http://flybase.org/reports/FBgn0000463.html	http://www.omim.org/entry/606582	Delta (Dl).
102314	CG11269	CG11269	Negative		-	Negative		-	Negative		http://flybase.org/reports/FBgn0034700.html	http://www.omim.org/entry/617098
100728	CG3209	CG3209	Negative		-	Negative		-	Negative		http://flybase.org/reports/FBgn0034971.html	http://www.omim.org/entry/608143
104350	CG5887	Desat1	Negative		-	Positive		No	Negative		http://flybase.org/reports/FBgn0086687.html	http://www.omim.org/entry/604031	Desaturase 1 (Desat1).
108185	CG9743	CG9743	Negative		-	Negative		-	Negative		http://flybase.org/reports/FBgn0039756.html	http://www.omim.org/entry/604031
105956	cg3299	Dm-vincp	Negative		-			-					Not set up with Yki and SOCS
106099	CG5525	CCT4	Negative		-	Negative		-	Negative		http://flybase.org/reports/FBgn0032444.html	http://omim.org/entry/605142	Chaperonin containing TCP1 subunit 4 (CCT4).
106685	CG6957	Oscillin	Negative		-	Negative		-	Negative		http://flybase.org/reports/FBgn0031717.html	http://www.omim.org/entry/613222	Oscillin (Oscillin).
110584	CG42277	rn	Negative		-	Negative		-	Negative		http://flybase.org/reports/FBgn0267337.html		rotund (rn).
105782	CG11382	CG11382	Negative		-	Negative		-	Negative		http://flybase.org/reports/FBgn0040367.html		No human ortholog.
101368	CG1637	CG1637	Negative		-	Negative		-	Negative		http://flybase.org/reports/FBgn0030245.html	http://www.omim.org/entry/610490
101501	CG9802	SMC3	Negative		-	Negative		-	Negative		http://flybase.org/reports/FBgn0015615.html	http://www.omim.org/entry/606062	Structural maintenance of chromosomes 3 (SMC3).
101476	CG7470	CG7470	Negative		-	Negative		-	Negative		http://flybase.org/reports/FBgn0037146.html	http://www.omim.org/entry/138250
101393	CG10214	CG10214	Negative		-	Negative		-	Negative		http://flybase.org/reports/FBgn0039115.html	http://www.omim.org/entry/607149
101428	CG42311	grh	Negative		-	Negative		-	Negative		http://flybase.org/reports/FBgn0259211.html	http://www.omim.org/entry/609786	grainy head (grh).
101376	CG4551	Dyrk2	Negative		-	Negative		-	Negative		http://flybase.org/reports/FBgn0016930.html	http://www.omim.org/entry/609181	Dual-specificity tyrosine phosphorylation-regulated kinase 2 (Dyrk2).
102434	CG7077	rdhB	Negative		-	Negative		-	Negative		http://flybase.org/reports/FBgn0038946.html	http://www.omim.org/entry/616159	retinol dehydrogenase B (rdhB).
101433	CG6523	CG6523	Negative		-	Negative		-	Negative		http://flybase.org/reports/FBgn0032509.html	http://www.omim.org/entry/612754
101644	CG8733	Cyp305a1	Negative		-	Negative		-	Negative		http://flybase.org/reports/FBgn0036910.html	http://www.omim.org/entry/601258	Cyp305a1 (Cyp305a1).
103989	CG31874	CG31874	Negative		-	Negative		-	Negative		http://flybase.org/reports/FBgn0051874.html	http://www.omim.org/entry/136850
106562	CG8893	Gapdh2	Negative		-	Negative		-	Negative		http://flybase.org/reports/FBgn0001092.html	http://www.omim.org/entry/138400	Glyceraldehyde 3 phosphate dehydrogenase 2 (Gapdh2).
105406	CG9701	CG9701	Negative		-	Positive		No	Negative		http://flybase.org/reports/FBgn0036659.html	http://www.omim.org/entry/617060
110212	CG8288	mRpL3	Negative		-	Negative		-	Negative		http://flybase.org/reports/FBgn0030686.html	http://www.omim.org/entry/607118	mitochondrial ribosomal protein L3 (mRpL3).
101623	CG4105	Cyp4e3	Negative		-	Negative		-	Negative		http://flybase.org/reports/FBgn0015035.html	http://www.omim.org/entry/608614	Cytochrome P450-4e3 (Cyp4e3).
105946	CG12238	e(y)3	Negative		-	Negative		-	Negative		http://flybase.org/reports/FBgn0087008.html	http://www.omim.org/entry/613069	enhancer of yellow 3 (e(y)3).
106932	CG30372	Asap	Negative		-	Negative		-	Negative		http://flybase.org/reports/FBgn0050372.html	http://www.omim.org/entry/603817	ArfGAP with SH3 domain, ankyrin repeat and PH domain (Asap).
107709	CG4567	ico	Negative		-	Negative		-	Negative		http://flybase.org/reports/FBgn0263133.html	http://www.omim.org/entry/606639	iconoclast (ico).
108004	CG6650	CG6650	Negative		-	Negative		-	Negative		http://flybase.org/reports/FBgn0036402.html	http://www.omim.org/entry/611861
109538	CG5799	dve	Negative		-	Negative		-	Negative		http://flybase.org/reports/FBgn0020307.html	http://www.omim.org/entry/602075	Defective proventriculus (dve).
108065	CG6050	EfTuM	Negative		-	Negative		-	Negative		http://flybase.org/reports/FBgn0024556.html	http://www.omim.org/entry/602389	Elongation factor Tu mitochondrial (EfTuM).
101656	CG18124	mTTF	Negative		-	Negative		-	Negative		http://flybase.org/reports/FBgn0028530.html		mitochondrial transcription termination factor (mTTF).
107785	CG1447	Ptx1	Negative		-	Negative		-	Negative		http://flybase.org/reports/FBgn0020912.html	http://www.omim.org/entry/601542	Ptx1 (Ptx1).
101506	CG33002	mRpL27	Negative		-	Negative		-	Negative		http://flybase.org/reports/FBgn0053002.html	http://www.omim.org/entry/611837	mitochondrial ribosomal protein L27 (mRpL27).
102656	CG15807	Cyp313a5	Negative		-	Negative		-	Negative		http://flybase.org/reports/FBgn0038005.html	http://www.omim.org/entry/604087	Cyp313a5 (Cyp313a5).
101423	CG14048	mRpL14	Negative		-	Negative		-	Negative		http://flybase.org/reports/FBgn0040389.html	http://www.omim.org/entry/611827	mitochondrial ribosomal protein L14 (mRpL14).
101530	CG18377	Cyp49a1	Negative		-	Negative		-	Negative		http://flybase.org/reports/FBgn0033524.html	http://www.omim.org/entry/126065	Cyp49a1 (Cyp49a1).
106354	CG10842	Cyp4p1	Negative		-	Negative		-	Negative		http://flybase.org/reports/FBgn0015037.html	http://www.omim.org/entry/124075	Cytochrome P450-4p1 (Cyp4p1).
109467	CG9307	Cht5	Negative		-	Negative		-	Negative		http://flybase.org/reports/FBgn0038180.html	http://www.omim.org/entry/606080	Chitinase 5 (Cht5).
108102	CG42366	CG42366	Negative		-	Positive		No	Negative		http://flybase.org/reports/FBgn0259712.html	http://www.omim.org/entry/612325
110514	CG12131	Adam	Negative		-	Negative		-	Negative		http://flybase.org/reports/FBgn0027619.html	http://www.omim.org/entry/603910	Adam (Adam).
109338	CG10664	COX4	Negative		-	Negative		-	Negative		http://flybase.org/reports/FBgn0032833.html	http://www.omim.org/entry/123864	Cytochrome c oxidase subunit 4 (COX4).
105395	CG11660	RIOK1	Negative		-	Negative		-	Negative		http://flybase.org/reports/FBgn0036187.html		RIO kinase 1 (RIOK1). Human RIO kinase 1 (RIOK1) ortholog. HGNC:18656.
106822	CG12244	lic	Negative		-	Negative		-	Negative		http://flybase.org/reports/FBgn0261524.html	http://www.omim.org/entry/601254	licorne (lic).
105292	CG9151	acj6	Negative		-	Negative		-	Negative		http://flybase.org/reports/FBgn0000028.html	http://www.omim.org/entry/113725	abnormal chemosensory jump 6 (acj6).
102856	CG9920	CG9920	Negative		-	Negative		-	Negative		http://flybase.org/reports/FBgn0038200.html	http://www.omim.org/entry/600141
105249	CG2984	Pp2C1	Negative		-	Positive		No	Negative		http://flybase.org/reports/FBgn0022768.html	http://www.omim.org/entry/605100	Protein phosphatase 2C (Pp2C1).
104638	CG31875	CG31875	Negative		-	Negative		-	Negative		http://flybase.org/reports/FBgn0051875.html	http://www.omim.org/entry/607675
106419	CG4095	CG4095	Negative		-	Negative		-	Negative		http://flybase.org/reports/FBgn0029890.html	http://www.omim.org/entry/136850
106285	CG17453	Cyp317a1	Negative		-	Negative		-	Negative		http://flybase.org/reports/FBgn0033982.html	http://www.omim.org/entry/274180	Cyp317a1 (Cyp317a1).
102773	CG1924	CG1924	Negative		-	Negative		-	Negative		http://flybase.org/reports/FBgn0030377.html	http://www.omim.org/entry/114217
101758	CG1098	Madm	Negative		-	Negative		-	Negative		http://flybase.org/reports/FBgn0027497.html	http://www.omim.org/entry/606010	MLF1-adaptor molecule (Madm).
107508	CG6889	tara	Negative		-	Negative		-	Negative		http://flybase.org/reports/FBgn0040071.html		taranis (tara).
103544	CG11909	tobi	Negative		-	Negative		-	Negative		http://flybase.org/reports/FBgn0261575.html		target of brain insulin (tobi). Human KIAA1161 (KIAA1161) ortholog.
104598	CG12020	CG12020	Negative		-	Negative		-	Negative		http://flybase.org/reports/FBgn0035273.html		Human DnaJ heat shock protein family (Hsp40) member C18 (DNAJC18) ortholog.
103638	CG2713	ttm50	Negative		-	Negative		-	Negative		http://flybase.org/reports/FBgn0250874.html	http://www.omim.org/entry/607381
104121	CG5653	CG5653	Negative		-	Negative		-	Negative		http://flybase.org/reports/FBgn0035943.html
104618	CG10578	DnaJ-1	Negative		-	Negative		-	Negative		http://flybase.org/reports/FBgn0263106.html	http://www.omim.org/entry/611327	DnaJ-like-1 (DnaJ-1).
101543	CG12128	CG12128	Negative		-	Negative		-	Negative		http://flybase.org/reports/FBgn0033473.html		Human SPOUT domain containing methyltransferase 1 (SPOUT1) ortholog. HGNC:26933.
103490	CG10477	CG10477	Negative		-	Negative		-	Negative		http://flybase.org/reports/FBgn0035661.html
100553	CG11971	E(var)3-9	Negative		-	Negative		-	Negative		http://flybase.org/reports/FBgn0260243.html	http://www.omim.org/entry/616085	Enhancer of variegation 3-9 (E(var)3-9).
101488	CG1057	Mediator complex subunit 31	Negative		-	Negative		-	Negative		http://flybase.org/reports/FBgn0037262.html
101558	CG2986	Ribosomal protein S21	Negative		-	Negative		-	Negative		http://flybase.org/reports/FBgn0015521.html
102638	CG33007	Activated Cdc42 kinase-like	Negative		-	Negative		-	Negative		http://flybase.bio.indiana.edu/cgi-bin/uniq.html?caller=genejump&context=CG43741
101493	CG10009	Noa36	Negative		-	Negative		-	Negative		http://flybase.org/reports/FBgn0026400.html	http://omim.org/entry/609550
102646	CG5150	ALKALINE PHOSPHATASE, INTESTINAL; ALPI	Negative		-	Negative		-	Negative		http://flybase.bio.indiana.edu/cgi-bin/uniq.html?caller=genejump&context=CG5150
105109	CG9279	protein_coding_gene	Negative		-	Negative		-	Negative		http://flybase.bio.indiana.edu/cgi-bin/uniq.html?caller=genejump&context=CG9279	http://omim.org/entry/601143
109018	CG34340	protein_coding_gene	Negative		-	Negative		-	Negative		http://flybase.bio.indiana.edu/cgi-bin/uniq.html?caller=genejump&context=CG34340
101377	CG4608	branchless	Negative		-	Negative		-	Negative		http://flybase.bio.indiana.edu/cgi-bin/uniq.html?caller=genejump&context=CG4608
108954	CG12390	defective in the avoidance of repellents	Negative		-	Negative		-	Negative
102516	CG13796	protein_coding_gene	Negative		-	Negative		-	Negative
101375	CG4764	Vacuolar protein sorting 29	Negative		-	Negative		-	Negative
101346	CG5502	Ribosomal protein L4	Negative		-	Negative		-	Negative
100703	CG4904	Proteasome ?6 subunit	Negative		-	Negative		-	Negative
101374	CG3198	protein_coding_gene	Negative		-	Negative		-	Negative
109982	CG17397	Mediator complex subunit 21	Negative		-	Negative		-	Negative
110487	CG34345	CG34345	Negative		-	Negative		-	Negative		http://flybase.org/reports/FBgn0085374.html	http://www.omim.org/entry/176710
105108	CG9450	Tudor (Tud)	Negative		-	Negative		-	Negative		http://flybase.org/reports/FBgn0003891.html	http://www.omim.org/entry/611200
103984	CG14882	CG14882	Negative		-	Negative		-	Negative		http://flybase.org/reports/FBgn0038429.html	http://www.omim.org/entry/602568
104515	CG14032	cypa4ac1	Negative		-	Negative		-	Negative		http://flybase.org/reports/FBgn0031693.html	http://www.omim.org/entry/608614	Cyp4ac1 (Cyp4ac1).
105746	CG10699	Lim3	Negative		-	Negative		-	Negative		http://flybase.org/reports/FBgn0002023.html	http://www.omim.org/entry/600577	Lim3 (Lim3).
104488	CG10184	CG10184	Negative		-	Negative		-	Negative		http://flybase.org/reports/FBgn0039094.html		No human ortholog.
110409	CG5247	Irbp	Negative		-	Negative		-	Negative		http://flybase.org/reports/FBgn0011774.html	http://www.omim.org/entry/152690	inverted repeat binding protein (Irbp).
104499	CG4205	Fdx1	Negative		-	Negative		-	Negative		http://flybase.org/reports/FBgn0011769.html	http://www.omim.org/entry/614585	Ferredoxin (Fdx1).
105121	CG3845	NAT1	Negative		-	Negative		-	Negative		http://flybase.org/reports/FBgn0010488.html	http://www.omim.org/entry/602325	NAT1 (NAT1).
105707	CG14838	CG14838	Negative		-	Negative		-	Negative		http://flybase.org/reports/FBgn0035799.html		Human WD repeat domain 63 (WDR63) ortholog. HGNC:30711.
105825	CG9143	CG9143	Negative		-	Negative		-	Negative		http://flybase.org/reports/FBgn0034496.html	http://www.omim.org/entry/606181
104458	CG8302	cytochrome P450	Negative		-	Negative		-	Negative		http://flybase.org/reports/FBgn0034053.html
103284	CG14879	CG14879	Negative		-	Negative		-	Negative		http://flybase.org/reports/FBgn0038419.html		No human ortholog.
105763	CG17737	eIF1	Negative		-	Negative		-	Negative		http://flybase.org/reports/FBgn0035423.html		eukaryotic translation initiation factor 1 (eIF1). Human eukaryotic translation initiation factor 1B (EIF1B) ortholog. HGNC:30792.
106220	CG8696	Mal-A1	Negative		-	Negative		-	Negative		http://flybase.org/reports/FBgn0002570.html	http://www.omim.org/entry/104614	Maltase A1 (Mal-A1).
104540	CG13551	CG13551	Negative		-	Negative		-	Negative		http://flybase.org/reports/FBgn0040660.html	http://www.omim.org/entry/614981
103975	CG3466	Cyp4d2	Negative		-	Negative		-	Negative		http://flybase.org/reports/FBgn0011576.html	http://www.omim.org/entry/608614	cytochrome P450-4D2 (Cyp4d2).
104058	CG32405	Cpr65Av	Negative		-	Negative		-	Negative		http://flybase.org/reports/FBgn0052405.html		Cuticular protein 65Av (Cpr65Av). No human ortholog.
105106	CG12264	CG12264	Negative		-	Negative		-	Negative		http://flybase.org/reports/FBgn0032393.html	http://www.omim.org/entry/603485
107308	CG17642	mRpL48	Negative		-	Negative		-	Negative		http://flybase.org/reports/FBgn0031357.html	http://www.omim.org/entry/611853	mitochondrial ribosomal protein L48 (mRpL48).
102660	CG10140	protein_coding_gene	Negative		-	Negative		-	Negative
104130	CG3360	Cyp313a1	Negative		-	Negative		-	Negative		http://flybase.org/reports/FBgn0038236.html	http://www.omim.org/entry/605207	Cyp313a1 (Cyp313a1).
107313	CG7583	CtBP	Negative		-	Negative		-	Negative		http://flybase.org/reports/FBgn0020496.html	http://www.omim.org/entry/602618	C-terminal Binding Protein (CtBP).
108994	CG2488	(6-4)-photolyase	Negative		-	Negative		-	Negative
104492	CG12096	CG12096	Negative		-	Negative		-	Negative		http://flybase.org/reports/FBgn0030457.html	http://www.omim.org/entry/604452
102664	CG13597	testis-specifically expressed bromodomain containing protein-1	Negative		-	Negative		-	Negative
110768	CG2028	CkIalpha	Negative		-	Negative		-	Negative		http://flybase.org/reports/FBgn0015024.html	http://www.omim.org/entry/600505	Casein kinase Ialpha (CkIalpha).
100238	CG15128	CG15128	Negative		-	Negative		-	Negative		http://flybase.org/reports/FBgn0034467.html	http://www.omim.org/entry/617095	Low DIOPT score.
101337	CG7977	Ribosomal protein L23A	Negative		-	Negative		-	Negative
100202	CG4465	CG4465	Negative		-	Negative		-	Negative		http://flybase.org/reports/FBgn0038750.html	http://www.omim.org/entry/602608
100801	CG15432	protein_coding_gene	Negative		-	Negative		-	Negative
110621	CG2899	ksr	Negative		-	Negative		-	Negative		http://flybase.org/reports/FBgn0015402.html	http://www.omim.org/entry/601132	kinase suppressor of ras (ksr).
101340	CG1938	Dynein light intermediate chain	Negative		-	Negative		-	Negative
100318	CG10391	Cyp310a1	Negative		-	Negative		-	Negative		http://flybase.org/reports/FBgn0032693.html	http://www.omim.org/entry/606534	Cyp310a1 (Cyp310a1).
101306	CG12075	protein_coding_gene	Negative		-	Negative		-	Negative
101367	CG11985	rotein_coding_gene	Negative		-	Negative		-	Negative
107042	CG7028	CG7028	Negative		-	Negative		-	Negative		http://flybase.org/reports/FBgn0027587.html	http://www.omim.org/entry/602338
101515	CG12975	protein_coding_gene	Negative		-	Negative		-	Negative		http://flybase.org/reports/FBgn0037061.html
100204	CG10267	Zif	Negative		-	Negative		-	Negative		http://flybase.org/reports/FBgn0037446.html		Zinc-finger protein (Zif).
108190	CG8889	Metallophosphoesterase	Negative		-	Negative		-	Negative		http://flybase.org/reports/FBgn0259985.html
100186	CG32181	CG32181	Negative		-	Negative		-	Negative		http://flybase.org/reports/FBgn0052181.html		No human ortholog.
102402	CG6770	protein_coding_gene	Negative		-	Negative		-	Negative		http://flybase.org/reports/FBgn0032400.html
101871	CG6272	Irbp18	Negative		-	Negative		-	Negative		http://flybase.org/reports/FBgn0036126.html	http://www.omim.org/entry/138972	Inverted repeat binding protein 18 kDa (Irbp18).
108999	CG5413	Cellular Repressor of E1A-stimulated Genes	Negative		-	Negative		-	Negative		http://flybase.org/reports/FBgn0025456.html
103513	CG3324	Pkg21D	Negative		-	Negative		-	Negative		http://flybase.org/reports/FBgn0000442.html	http://www.omim.org/entry/601591	cGMP-dependent protein kinase 21D (Pkg21D).
102659	CG34374	Rap GTPase activating protein 1	Negative		-	Negative		-	Negative		http://flybase.org/reports/FBgn0264895.html
100240	CG15591	Osi8	Negative		-	Negative		-	Negative		http://flybase.org/reports/FBgn0037415.html		Osiris 8 (Osi8). No human ortholog.
102406	CG2216	Ferritin 1 heavy chain homologue	Negative		-	Negative		-	Negative
102652	CG9525	protein_coding_gene	Negative		-	Negative		-	Negative		http://flybase.org/reports/FBgn0032080.html
101319	CG3500	protein_coding_gene	Negative		-	Negative		-	Negative		http://flybase.org/reports/FBgn0034849.html
101454	CG17060	Rab10	Negative		-	Negative		-	Negative		http://flybase.org/reports/FBgn0015789.html
100305	CG2102	cas	Negative		-	Negative		-	Negative		http://flybase.org/reports/FBgn0004878.html	http://www.omim.org/entry/609895	castor (cas).
100203	CG15820	CG15820	Negative		-	Negative		-	Negative		http://flybase.org/reports/FBgn0035312.html		Human serine hydrolase like 2 (SERHL2) ortholog. HGNC:29446.
110632	CG2244	MTA1-like	Negative		-	Negative		-	Negative		http://flybase.org/reports/FBgn0027951.html	http://www.omim.org/entry/609050	Metastasis associated 1-like (MTA1-like).
100253	CG3853	Glut3	Negative		-	Negative		-	Negative		http://flybase.org/reports/FBgn0015230.html	http://www.omim.org/entry/605245	Glucose transporter type 3 (Glut3).
100207	CG16800	CG16800	Negative		-	Negative		-	Negative		http://flybase.org/reports/FBgn0032462.html		No human ortholog.
100194	CG9649	CG9649	Negative		-	Negative		-	Negative		http://flybase.org/reports/FBgn0038211.html	http://www.omim.org/entry/613878	Low DIOPT score.
100270	CG8801	Non1	Negative		-	Negative		-	Negative		http://flybase.org/reports/FBgn0028473.html		Novel nucleolar protein 1 (Non1). Human GTP binding protein 4 (GTPBP4) ortholog. HGNC:21535.
103655	CG10447	Nf-YB	Negative		-	Negative		-	Negative		http://flybase.org/reports/FBgn0032816.html	http://www.omim.org/entry/189904	nuclear factor Y-box B (Nf-YB).
100192	CG14227	CG14227	Negative		-	Negative		-	Negative		http://flybase.org/reports/FBgn0031058.html
100181	CG34143	Ir10a	Negative		-	Negative		-	Negative		http://flybase.org/reports/FBgn0083979.html	http://www.omim.org/entry/610659	Ionotropic receptor 10a (Ir10a). Low DIOPT score.
100239	CG10750	CG10750	Negative		-	Negative		-	Negative		http://flybase.org/reports/FBgn0032769.html		Human cilia and flagella associated protein 73 (CFAP73) ortholog. HGNC:37100.
103489	CG14031	Cyp4ac3	Negative		-	Negative		-	Negative		http://flybase.org/reports/FBgn0034420.html	http://www.omim.org/entry/608614	Cyp4ac3 (Cyp4ac3).
100252	CG10345	CG10345	Negative		-	Negative		-	Negative		http://flybase.org/reports/FBgn0027562.html	http://www.omim.org/entry/602257
100235	CG8902	Nuf2	Negative		-	Negative		-	Negative		http://flybase.org/reports/FBgn0031886.html	http://www.omim.org/entry/613798	Nuf2 (Nuf2).
100255	CG11196	Dic3	Negative		-	Negative		-	Negative		http://flybase.org/reports/FBgn0033248.html	http://www.omim.org/entry/606794	Dicarboxylate carrier 3 (Dic3).
100269	CG3724	Pgd	Negative		-	Negative		-	Negative		http://flybase.org/reports/FBgn0004654.html	http://www.omim.org/entry/172200	Phosphogluconate dehydrogenase (Pgd).
100191	CG1979	CG1979	Negative		-	Negative		-	Negative		http://flybase.org/reports/FBgn0026563.html		No human ortholog.
100330	CG18522	AOX1	Negative		-	Negative		-	Negative		http://flybase.org/reports/FBgn0267408.html	http://www.omim.org/entry/602841	Aldehyde oxidase 1 (AOX1).
100199	CG33522	scaf6	Negative		-	Negative		-	Negative		http://flybase.org/reports/FBgn0261872.html		SR-related CTD associated factor 6 (scaf6). Human calcium homeostasis endoplasmic reticulum protein (CHERP) ortholog. HGNC:16930.
100185	CG8673	CG8673	Negative		-	Negative		-	Negative		http://flybase.org/reports/FBgn0031986.html	http://www.omim.org/entry/603018
100301	CG1650	unpg	Negative		-	Negative		-	Negative		http://flybase.org/reports/FBgn0015561.html	http://www.omim.org/entry/603354	unplugged (unpg).
103517	CG33213	CG33213	Negative		-	Negative		-	Negative		http://flybase.org/reports/FBgn0053213.html
100258	CG3078	CG3078	Negative		-	Negative		-	Negative		http://flybase.org/reports/FBgn0023524.html	http://www.omim.org/entry/608204
100260	CG10952	eag	Negative		-	Negative		-	Negative		http://flybase.org/reports/FBgn0000535.html	http://www.omim.org/entry/605716	ether a go-go (eag).
100249	CG3679	CG3679	Negative		-	Negative		-	Negative		http://flybase.org/reports/FBgn0027521.html		No human ortholog.
101737	CG5206	bon	Negative		-	Negative		-	Negative		http://flybase.org/reports/FBgn0023097.html	http://www.omim.org/entry/605769	bonus (bon).
100278	CG8635	CG8635	Negative		-	Negative		-	Negative		http://flybase.org/reports/FBgn0033317.html		Human zinc finger CCCH-type containing 15 (ZC3H15) ortholog. HGNC:29528.
100187	CG31679	Tengl3	Negative		-	Negative		-	Negative		http://flybase.org/reports/FBgn0051679.html	http://www.omim.org/entry/600440	Testis EndoG-Like 3 (Tengl3).
100267	CG5231	Las	Negative		-	Negative		-	Negative		http://flybase.org/reports/FBgn0029158.html	http://www.omim.org/entry/607031	Lipoic acid synthase (Las).
100201	CG1978	Or45a	Negative		-	Negative		-	Negative		http://flybase.org/reports/FBgn0033404.html		Odorant receptor 45a (Or45a). No human ortholog.
100243	CG30428	CG30428	Negative		-	Negative		-	Negative		http://flybase.org/reports/FBgn0050428.html	http://www.omim.org/entry/610673	Low DIOPT score.
100247	CG34389	cv-c	Negative		-	Negative		-	Negative		http://flybase.org/reports/FBgn0086901.html	http://www.omim.org/entry/604258	crossveinless c (cv-c).
100257	CG16910	key	Negative		-	Negative		-	Negative		http://flybase.org/reports/FBgn0041205.html	http://www.omim.org/entry/300248	kenny (key).
101694	CG7184	Mkrn1	Negative		-	Negative		-	Negative		http://flybase.org/reports/FBgn0029152.html	http://www.omim.org/entry/607754	Makorin 1 (Mkrn1).
101723	CG1644	Cyp6t1	Negative		-	Negative		-	Negative		http://flybase.org/reports/FBgn0031182.html	http://www.omim.org/entry/274180	Cyp6t1 (Cyp6t1).
100188	CG31077	CG31077	Negative		-	Negative		-	Negative		http://flybase.org/reports/FBgn0051077.html	http://www.omim.org/entry/602108	Low DIOPT score.
110672	CG9045	Myb	Negative		-	Negative		-	Negative		http://flybase.org/reports/FBgn0002914.html	http://www.omim.org/entry/159405	Myb oncogene-like (Myb).
107044	CG12176	Lig4	Negative		-	Negative		-	Negative		http://flybase.org/reports/FBgn0030506.html	http://www.omim.org/entry/601837	ligase4 (Lig4).
110494	CG33950	trol	Negative		-	Negative		-	Negative		http://flybase.org/reports/FBgn0267911.html	http://www.omim.org/entry/142461	terribly reduced optic lobes (trol).
101505	CG4859	Mmp1	Negative		-	Negative		-	Negative		http://flybase.org/reports/FBgn0035049.html	http://www.omim.org/entry/600754	Matrix metalloproteinase 1 (Mmp1).
106147	CG17149	Su(var)3-3	Negative		-	Positive	http://www.iiserpune.ac.in/rnai/uploads/research/450/images/d1c0d_Su(var)3-3-(KK106147-Yki).png	No	Negative		http://flybase.org/reports/FBgn0260397.html	http://www.omim.org/entry/609132	Suppressor of variegation 3-3 (Su(var)3-3). Human lysine demethylase 1A (KDM1A) ortholog. HGNC:29079.
102265	CG7802	neo	Negative		-	Negative		-	Negative		http://flybase.org/reports/FBgn0039704.html		neyo (neo).
109929	CG15113	5-HT1B	Negative		-	Negative		-	Negative		http://flybase.org/reports/FBgn0263116.html	http://www.omim.org/entry/109760	5-hydroxytryptamine (serotonin) receptor 1B (5-HT1B).
110177	CG6875	asp	Negative		-	Negative		-	Negative		http://flybase.org/reports/FBgn0000140.html	http://www.omim.org/entry/605481	abnormal spindle (asp).
104472	CG31637	CG31637	Negative		-	Negative		-	Negative		http://flybase.org/reports/FBgn0051637.html	http://www.omim.org/entry/605294
106640	CG30104	NT5E-2	Negative		-	Negative		-	Negative		http://flybase.org/reports/FBgn0050104.html	http://www.omim.org/entry/129190	Ecto-5'-nucleotidase 2 (NT5E-2).
104804	CG12073	5-HT7	Negative		-	Positive	http://www.iiserpune.ac.in/rnai/uploads/research/458/images/4e495_5-HT7-(KK104804-Yki).png	No	Negative		http://flybase.org/reports/FBgn0004573.html	http://www.omim.org/entry/182137	5-hydroxytryptamine (serotonin) receptor 7 (5-HT7). Human 5-hydroxytryptamine receptor 7 (HTR7) ortholog. HGNC:5302.
100095	CG10449	Catsup	Negative		-	Negative		-	Negative		http://flybase.org/reports/FBgn0002022.html	http://omim.org/entry/601416	Catecholamines up (Catsup).
104396	CG10954	Arpc2	Negative		-	Negative		-	Negative		http://flybase.org/reports/FBgn0032859.html	http://www.omim.org/entry/604224	Actin-related protein 2/3 complex, subunit 2 (Arpc2).
107757	CG8445	calypso	Negative		-	Negative		-	Negative		http://flybase.org/reports/FBgn0262166.html	http://www.omim.org/entry/603089	calypso (calypso).
100856	CG6433	qua	Negative		-	Negative		-	Negative		http://flybase.org/reports/FBgn0003187.html	http://www.omim.org/entry/613397	quail (qua).
109033	CG5991	CG5991	Negative		-	Negative		-	Negative		http://flybase.org/reports/FBgn0026576.html	http://www.omim.org/entry/612770
104775	CG9907	para	Negative		-	Negative		-	Negative		http://flybase.org/reports/FBgn0264255.html	http://www.omim.org/entry/182390	paralytic (para).
105507	CG7131	CG7131	Negative		-	Negative		-	Negative		http://flybase.org/reports/FBgn0038598.html		Human stabilizer of axonemal microtubules 2 (SAXO2) ortholog. HGNC:33727.
102481	CG34384	protein_coding_gene	Negative		-	Negative		-	Negative		http://flybase.org/reports/FBgn0085413.html
102667	CG14990	protein_coding_gene	Negative		-	Negative		-	Negative		http://flybase.org/reports/FBgn0035496.html
108941	CG10582	Sex-lethal interactor	Negative		-	Negative		-	Negative		http://flybase.org/reports/FBgn0028402.html
100814	CG7013	Mesencephalic astrocyte-derived neurotrophic factor ortholog	Negative		-	Negative		-	Negative		http://flybase.org/reports/FBgn0027095.html
101521	CG7238	septin interacting protein 1	Negative		-	Negative		-	Negative		http://flybase.org/reports/FBgn0024191.html
100479	CG31561	Osiris 16	Negative		-	Negative		-	Negative		http://flybase.org/reports/FBgn0051561.html
101528	CG31184	Lsm3	Negative		-	Negative		-	Negative		http://flybase.org/reports/FBgn0051184.html
102375	CG3931	Rrp4	Negative		-	Negative		-	Negative		http://flybase.org/reports/FBgn0034879.html
108998	CG9739	frizzled 2	Negative		-	Negative		-	Negative		http://flybase.org/reports/FBgn0016797.html
101307	CG30036	protein_coding_gene	Negative		-	Negative		-	Negative		http://flybase.org/reports/FBgn0050036.html
109909	CG6896	MYPT-75D	Negative		-	Negative		-	Negative		http://flybase.org/reports/FBgn0036801.html
102519	CG14210	protein_coding_gene	Negative		-	Negative		-	Negative		http://flybase.org/reports/FBgn0031040.html
100681	CG16916	Regulatory particle triple-A ATPase 3	Negative		-	Negative		-	Negative		http://flybase.org/reports/FBgn0028686.html
101320	CG32656	Mucin 11A	Negative		-	Negative		-	Negative		http://flybase.org/reports/FBgn0052656.html
102658	CG14269	protein_coding_gene	Negative		-	Negative		-	Negative		http://flybase.org/reports/FBgn0052656.html
106734	CG3594	CG3594	Negative		-	Negative		-	Negative		http://flybase.org/reports/FBgn0035063.html
107403	CG15753	Neto	Negative		-	Negative		-	Negative		http://flybase.org/reports/FBgn0265416.html	http://www.omim.org/entry/607974	Neuropilin and tolloid-like (Neto). Alias CG 44328.
107409	CG15370	CG15370	Negative		-	Positive		No	Negative		http://flybase.org/reports/FBgn0030107.html		No human ortholog.
103398	CG31860	ZnT33D	Negative		-	Positive		No	Negative		http://flybase.org/reports/FBgn0051860.html	http://www.omim.org/entry/602878	Zinc transporter 33D (ZnT33D).
103221	CG15645	cerv	Negative		-	Negative		-	Negative		http://flybase.org/reports/FBgn0030657.html	http://www.omim.org/entry/617246	cervantes (cerv).
103292	CG18444	alphaTry	Negative		-	Negative		-	Negative		http://flybase.org/reports/FBgn0003863.html		alphaTrypsin (alphaTry).
107353	CG7408	CG7408	Negative		-	Negative		-	Negative		http://flybase.org/reports/FBgn0036765.html	http://www.omim.org/entry/610009
105730	CG7787	CG7787	Negative		-	Negative		-	Negative		http://flybase.org/reports/FBgn0032020.html	http://www.omim.org/entry/603417
104490	CG3161	Vha16-1	Negative		-	Negative		-	Negative		http://flybase.org/reports/FBgn0262736.html	http://www.omim.org/entry/108745	Vacuolar H+ ATPase 16kD subunit 1 (Vha16-1).
110421	CG4973	mdlc	Negative		-	Negative		-	Negative		http://flybase.org/reports/FBgn0038772.html	http://www.omim.org/entry/300951	midlife crisis (mdlc). Human ring finger protein 113A (RNF113A) ortholog. HGNC:12974.
102435	CG10126	CG10126	Negative		-	Negative		-	Negative		http://flybase.org/reports/FBgn0038088.html		Human calcyphosine like (CAPSL) ortholog. HGNC:28375.
102742	CG15503	CheB93a	Negative		-	Positive		No	Negative		http://flybase.org/reports/FBgn0038888.html		Chemosensory protein B 93a (CheB93a). No human ortholog.
105735	CG1276	TfIIEbeta	Negative		-	Negative		-	Negative		http://flybase.org/reports/FBgn0015829.html	http://www.omim.org/entry/189964	Transcription factor IIEbeta (TfIIEbeta).
103968	CG33017	CG33017	Negative		-	Negative		-	Negative		http://flybase.org/reports/FBgn0053017.html
106791	CG32600	dpr8	Negative		-	Negative		-	Negative		http://flybase.org/reports/FBgn0052600.html		defective proboscis extension response 8 (dpr8). No human ortholog.
103910	CG6752	CG6752	Negative		-	Negative		-	Negative		http://flybase.org/reports/FBgn0038296.html	http://www.omim.org/entry/614472
107298	CG17947	alpha-Cat	Negative		-	Negative		-	Negative		http://flybase.org/reports/FBgn0010215.html	http://www.omim.org/entry/114025	alpha-Catenin (alpha-Cat).
106096	CG18143	DhpD	Negative		-	Negative		-	Negative		http://flybase.org/reports/FBgn0261436.html	http://www.omim.org/entry/139260	Dihydropterin deaminase (DhpD).
106204	CG12396	Nnp-1	Negative		-	Negative		-	Negative		http://flybase.org/reports/FBgn0022069.html	http://www.omim.org/entry/610653	Nnp-1 (Nnp-1).
106758	CG8189	ATPsynB	Negative		-	Negative		-	Negative		http://flybase.org/reports/FBgn0019644.html	http://www.omim.org/entry/603270	ATP synthase, subunit B (ATPsynB). Not set with EGFR.
108841	CG34438	Cap-G	Negative		-	Negative		-	Negative		http://flybase.org/reports/FBgn0259876.html	http://www.omim.org/entry/606280	Chromosome associated protein G (Cap-G).
106068	CG3757	y	Negative		-	Negative		-	Negative		http://flybase.org/reports/FBgn0004034.html		yellow (y).
110384	CG14804	Vps26	Negative		-	Negative		-	Negative		http://flybase.org/reports/FBgn0014411.html	http://www.omim.org/entry/610027	Vacuolar protein sorting 26 (Vps26).
106771	CG7291	Npc2a	Negative		-	Negative		-	Negative		http://flybase.org/reports/FBgn0031381.html	http://www.omim.org/entry/601015	Niemann-Pick type C-2a (Npc2a).
109187	CG7637	CG7637	Negative		-	Negative		-	Negative		http://flybase.org/reports/FBgn0033548.html	http://omim.org/entry/606471
107345	CG1785	CG1785	Negative		-	Negative		-	Negative		http://flybase.org/reports/FBgn0030061.html	http://www.omim.org/entry/605691
106082	CG14050	CG14050	Negative		-	Negative		-	Negative		http://flybase.org/reports/FBgn0040392.html		No human ortholog.
101856	CG31321	CG31321	Negative		-	Negative		-	Negative		http://flybase.org/reports/FBgn0051321.html	http://www.omim.org/entry/608956
107854	CG4984	CG4984	Negative		-	Negative		-	Negative		http://flybase.org/reports/FBgn0034267.html	http://www.omim.org/entry/602334
105422	CG9148	scf	Negative		-	Negative		-	Negative		http://flybase.org/reports/FBgn0025682.html	http://www.omim.org/entry/603420	supercoiling factor (scf).
107272	CG18549	CG18549	Negative		-	Negative		-	Negative		http://flybase.org/reports/FBgn0038053.html		Human major facilitator superfamily domain containing 11 (MFSD11) ortholog. HGNC:25458.
107378	CG30417	tbrd-3	Negative		-	Positive		No	Negative		http://flybase.org/reports/FBgn0050417.html	http://www.omim.org/entry/608749	testis-specifically expressed bromodomain containing protein-3 (tbrd-3).
108892	CG15706	CG15706	Negative		-	Negative		-	Negative		http://flybase.org/reports/FBgn0034093.html		Human major facilitator superfamily domain containing 6 like (MFSD6L) ortholog. HGNC:26656.
106122	CG31999	CG31999	Negative		-	Negative		-	Negative		http://flybase.org/reports/FBgn0051999.html	http://www.omim.org/entry/135821
104286	CG11306	CG11306	Negative		-	Negative		-	Negative		http://flybase.org/reports/FBgn0037108.html	http://www.omim.org/entry/613666
100200	CG1697	rho-4	Negative		-	Positive		No	Negative		http://flybase.org/reports/FBgn0030318.html	http://www.omim.org/entry/608962	rhomboid-4 (rho-4).
105627	CG12913	CG12913	Negative		-	Negative		-	Negative		http://flybase.org/reports/FBgn0033500.html	http://www.omim.org/entry/616616
101686	CG6992	glutamate receptor IIA	Negative		-	Negative		-	Negative		http://flybase.org/reports/FBgn0004620.html
104028	CG3832	Phm	Negative		-	Negative		-	Negative		http://flybase.org/reports/FBgn0019948.html	http://www.omim.org/entry/170270	peptidylglycine alpha-hydroxylating monooxygenase (Phm).
102982	CG30361	mtt	Negative		-	Negative		-	Negative		http://flybase.org/reports/FBgn0050361.html	http://www.omim.org/entry/601116	mangetout (mtt).
103812	CG6210	wls	Negative		-	Negative		-	Negative		http://flybase.org/reports/FBgn0036141.html	http://www.omim.org/entry/611514	wntless (wls).
108071	CG9554	eya	Negative		-	Negative		-	Negative		http://flybase.org/reports/FBgn0000320.html	http://www.omim.org/entry/601654	Eyes absent (eya).
100976	CG9550	CG9550	Negative		-	Negative		-	Negative		http://flybase.org/reports/FBgn0031826.html
106054	CG5161	Trs20	Negative		-	Negative		-	Negative		http://flybase.org/reports/FBgn0266724.html	http://www.omim.org/entry/300202	TRAPP subunit 20 ortholog (S. cerevisiae) (Trs20).
108019	CG8442	GluRIA	Negative		-	Negative		-	Negative		http://flybase.org/reports/FBgn0004619.html	http://www.omim.org/entry/305915	Glutamate receptor IA (GluRIA).
106086	CG3929	dx	Negative		-	Negative		-	Negative		http://flybase.org/reports/FBgn0000524.html	http://www.omim.org/entry/602582	deltex (dx).
101538	CG2621	sgg	Negative		-	Positive	http://www.iiserpune.ac.in/rnai/uploads/research/538/images/3f81b_GSK3B.jpg	No	Negative		http://flybase.org/reports/FBgn0003371.html	http://omim.org/entry/605004	shaggy (sgg).
108220	CG1520	Wiskott-Aldrich syndrome protein	Negative		-	Negative		-	Negative		http://flybase.org/reports/FBgn0024273.html
106255	CG7125	PKD	Negative		-	Negative		-	Negative		http://flybase.org/reports/FBgn0038603.html	http://www.omim.org/entry/607077	protein kinase D (PKD).
101445	CG1403	Sep-01	Negative		-	Negative		-	Negative		http://flybase.org/reports/FBgn0011710.html	http://www.omim.org/entry/601506	Septin-1 (Sep1).
102137	CG1638	CG1638	Negative		-	Negative		-	Negative		http://flybase.org/reports/FBgn0039855.html	http://www.omim.org/entry/300862
104773	CG2902	Nmdar1	Negative		-	Negative		-	Negative		http://flybase.org/reports/FBgn0010399.html	http://www.omim.org/entry/138249	NMDA receptor 1 (Nmdar1).
107180	CG12002	Pxn	Negative		-	Negative		-	Negative		http://flybase.org/reports/FBgn0011828.html	http://www.omim.org/entry/605158	Peroxidasin (Pxn).
104371	CG3159	Eaat2	Negative		-	Positive		No	Negative		http://flybase.org/reports/FBgn0026438.html	http://www.omim.org/entry/600300	Excitatory amino acid transporter 2 (Eaat2).
100268	CG32146	dlp	Negative		-	Negative		-	Negative		http://flybase.org/reports/FBgn0041604.html	http://www.omim.org/entry/300168	dally-like (dlp).
103435	CG13575	CG13575	Negative		-	Negative		-	Negative		http://flybase.org/reports/FBgn0034996.html
106381	CG13758	Pdfr	Negative		-	Negative		-	Negative		http://flybase.org/reports/FBgn0260753.html	http://www.omim.org/entry/114131	Pigment-dispersing factor receptor (Pdfr).
100296	CG5373	Pi3K59F	Negative		-	Negative		-	Negative		http://flybase.org/reports/FBgn0015277.html	http://www.omim.org/entry/602609	Phosphotidylinositol 3 kinase 59F (Pi3K59F).
101786	CG6788	CG6788	Negative		-	Negative		-	Negative		http://flybase.org/reports/FBgn0030880.html	http://www.omim.org/entry/605776
109274	CG1725	dlg1	Negative		-	Negative		-	Negative		http://flybase.org/reports/FBgn0001624.html	http://www.omim.org/entry/601014	discs large 1 (dlg1).
105747	CG32858	sn	Negative		-	Negative		-	Negative		http://flybase.org/reports/FBgn0003447.html	http://www.omim.org/entry/602689	singed (sn).
101578	CG32191	CG32191	Negative		-	Negative		-	Negative		http://flybase.org/reports/FBgn0052191.html	http://www.omim.org/entry/610009	Alias CG5584.
106174	CG12072	wts	Positive	http://www.iiserpune.ac.in/rnai/uploads/research/556/images/ba91d_Wts.jpg	No	Positive		No	Negative		http://flybase.org/reports/FBgn0011739.html	http://omim.org/entry/603473	warts (wts).
102152	CG5192	Rh6	Negative		-	Negative		-	Negative		http://flybase.org/reports/FBgn0019940.html	http://www.omim.org/entry/606665	Rhodopsin 6 (Rh6).
110708	CG8422	Dh44-R1	Negative		-	Negative		-	Negative		http://flybase.org/reports/FBgn0033932.html	http://www.omim.org/entry/602034	Diuretic hormone 44 receptor 1 (Dh44-R1).
108614	CG31111	CG31111	Negative		-	Negative		-	Negative		http://flybase.org/reports/FBgn0051111.html	http://www.omim.org/entry/610614
104008	CG9710	nudC	Negative		-	Negative		-	Negative		http://flybase.org/reports/FBgn0021768.html	http://www.omim.org/entry/610325	nudC (nudC).
104946	CG4139	Karl	Negative		-	Negative		-	Negative		http://flybase.org/reports/FBgn0030334.html	http://www.omim.org/entry/107740	Karl (Karl).
108690	CG16884	CG16884	Negative		-	Negative		-	Negative		http://flybase.org/reports/FBgn0028544.html
110185	CG10011	CG10011	Negative		-	Negative		-	Negative		http://flybase.org/reports/FBgn0039590.html		Human ankyrin repeat domain 50 (ANKRD50) ortholog. HGNC:29223.
107523	CG14406	CG14406	Negative		-	Negative		-	Negative		http://flybase.org/reports/FBgn0030435.html		No human ortholog.
104959	CG10498	Cdk2	Negative		-	Negative		-	Negative		http://flybase.org/reports/FBgn0004107.html	http://www.omim.org/entry/116953	Cyclin-dependent kinase 2 (Cdk2).
103571	CG9643	CG9643	Negative		-	Negative		-	Negative		http://flybase.org/reports/FBgn0031485.html		Human EEF1A lysine methyltransferase 2 (EEF1AKMT2) ortholog. HGNC:33787.
103657	CG31450	mRpS18A	Negative		-	Negative		-	Negative		http://flybase.org/reports/FBgn0051450.html	http://www.omim.org/entry/611981	mitochondrial ribosomal protein S18A (mRpS18A).
108847	CG4152	Mtr4	Negative		-	Negative		-	Negative		http://flybase.org/reports/FBgn0001986.html		Mtr4 helicase (Mtr4). Human Ski2 like RNA helicase 2 (SKIV2L2) ortholog. HGNC:18734.
105689	CG13000	CG13000	Negative		-	Negative		-	Negative		http://flybase.org/reports/FBgn0030807.html		No human ortholog.
104661	CG17290	CG17290	Negative		-	Negative		-	Negative		http://flybase.org/reports/FBgn0034201.html		No human ortholog.
105630	CG5483	Lrrk	Negative		-	Negative		-	Negative		http://flybase.org/reports/FBgn0038816.html	http://www.omim.org/entry/610986	Leucine-rich repeat kinase (Lrrk).
109660	CG9539	Sec61alpha	Negative		-	Negative		-	Negative		http://flybase.org/reports/FBgn0086357.html		Sec61 alpha subunit (Sec61alpha). Human Sec61 translocon alpha 2 subunit (SEC61A2) ortholog. HGNC:17702.
106814	CG7626	Spt5	Negative		-	Negative		-	Negative		http://flybase.org/reports/FBgn0040273.html	http://www.omim.org/entry/602102	Spt5 (Spt5).
108882	CG8900	RpS18	Negative		-	Negative		-	Negative		http://flybase.org/reports/FBgn0010411.html	http://www.omim.org/entry/180473	Ribosomal protein S18 (RpS18).
105446	CG1791	CG1791	Negative		-	Negative		-	Negative		http://flybase.org/reports/FBgn0030163.html	http://www.omim.org/entry/603874
108874	CG2469	Ctr9	Negative		-	Negative		-	Negative		http://flybase.org/reports/FBgn0035205.html	http://www.omim.org/entry/609366	Ctr9 (Ctr9).
108567	CG8858	CG8858	Negative		-	Negative		-	Negative		http://flybase.org/reports/FBgn0033698.html	http://www.omim.org/entry/616694
105496	CG13389	RpS13	Negative		-	Negative		-	Negative		http://flybase.org/reports/FBgn0010265.html	http://www.omim.org/entry/180476	Ribosomal protein S13 (RpS13).
106382	CG6187	RluA-2	Negative		-	Negative		-	Negative		http://flybase.org/reports/FBgn0032256.html		RluA-2 (RluA-2). Human RNA pseudouridylate synthase domain containing 2 (RPUSD2) ortholog. HGNC:24180.
106435	CG9368	CG9368	Negative		-	Negative		-	Negative		http://flybase.org/reports/FBgn0036890.html		No human ortholog.
106373	CG14095	CG14095	Negative		-	Negative		-	Negative		http://flybase.org/reports/FBgn0036870.html		No human ortholog.
100096	CG3905	Su(z)2	Negative		-	Negative		-	Negative		http://flybase.org/reports/FBgn0265623.html	http://www.omim.org/entry/600346	Suppressor of zeste 2 (Su(z)2).
108720	CG6583	CG6583	Negative		-	Negative		-	Negative		http://flybase.org/reports/FBgn0032420.html		No human ortholog.
106397	CG7334	Sugb	Negative		-	Negative		-	Negative		http://flybase.org/reports/FBgn0036191.html		Sugar baby (Sugb). Human major facilitator superfamily domain containing 6 like (MFSD6L) ortholog. HGNC:26656.
100163	CG11221	CG11221	Negative		-	Negative		-	Negative		http://flybase.org/reports/FBgn0031855.html		Human SH3 domain binding kinase 1 (SBK1) ortholog. HGNC:17699.
108904	CG15100	MetRS	Negative		-	Negative		-	Negative		http://flybase.org/reports/FBgn0034401.html	http://www.omim.org/entry/156560	Methionyl-tRNA synthetase (MetRS).
108851	CG5748	Hsf	Negative		-	Positive		No	Negative		http://flybase.org/reports/FBgn0001222.html	http://www.omim.org/entry/140580	Heat shock factor (Hsf).
106337	CG14184	CG14184	Negative		-	Negative		-	Negative		http://flybase.org/reports/FBgn0036932.html	http://www.omim.org/entry/613510
108888	CG9181	Ptp61F	Negative		-	Positive	http://www.iiserpune.ac.in/rnai/uploads/research/594/images/747c9_YKI_108888.jpg	No	Negative		http://flybase.org/reports/FBgn0267487.html	http://www.omim.org/entry/176885	Protein tyrosine phosphatase 61F (Ptp61F).
100078	CG5490	Tl	Negative		-	Negative		-	Negative		http://flybase.org/reports/FBgn0262473.html	http://www.omim.org/entry/300365	Tl (Toll).
108559	CG11877	Atg14	Negative		-	Negative		-	Negative		http://flybase.org/reports/FBgn0039636.html	http://www.omim.org/entry/613515	Autophagy-related 14 (Atg14).
102741	CG31313	CG31313	Negative		-	Negative		-	Negative		http://flybase.org/reports/FBgn0051313.html		No human ortholog.
107052	CG3962	Keap1	Negative		-	Negative		-	Negative		http://flybase.org/reports/FBgn0038475.html	http://www.omim.org/entry/606016	Keap1 (Keap1).
107220	CG31324	CG31324	Negative		-	Negative		-	Negative		http://flybase.org/reports/FBgn0051324.html		No human ortholog.
109135	cG3884	-	Negative		-			-
102857	CG6048	CG6048	Negative		-	Negative		-	Negative		http://flybase.org/reports/FBgn0029827.html
107784	CG10130	Sec61beta	Negative		-	Negative		-	Positive		http://flybase.org/reports/FBgn0010638.html	http://www.omim.org/entry/609214	Sec61 beta subunit (Sec61beta).
101365	CG1086	Glut1	Negative		-	Negative		-	Negative		http://flybase.org/reports/FBgn0264574.html	http://www.omim.org/entry/138170	Glucose transporter 1 (Glut1).
105652	CG3793	CG3793	Negative		-	Negative		-	Negative		http://flybase.org/reports/FBgn0028507.html	http://www.omim.org/entry/610286
103399	cg7479	Leucyl-tRNA synthetase	Negative		-			-
103632	CG12141	LysRS	Negative		-	Negative		-	Negative		http://flybase.org/reports/FBgn0027084.html	http://www.omim.org/entry/601421	Lysyl-tRNA synthetase (LysRS).
110412	CG15481	Ski6	Negative		-	Negative		-	Negative		http://flybase.org/reports/FBgn0032487.html	http://www.omim.org/entry/606491	Ski6 (Ski6).
101384	CG7971	-	Negative		-			-
105672	Cg12413	-	Negative		-			-
104949	CG43065	bru2	Negative		-	Negative		-	Negative		http://flybase.org/reports/FBgn0262475.html	http://www.omim.org/entry/602538	bruno 2 (bru2).
102736	cg1873	Elongation factor 1?100E	Negative		-			-
100309	CG31155	Rpb7	Negative		-	Negative		-	Negative		http://flybase.org/reports/FBgn0051155.html	http://www.omim.org/entry/602013	Rpb7 (Rpb7).
104089	CG7438	Myo31DF	Positive	http://www.iiserpune.ac.in/rnai/uploads/research/616/images/f8df0_Myo31DG-(KK104089-EGFR).png	No	Negative		-	Negative		http://flybase.org/reports/FBgn0086347.html	http://www.omim.org/entry/606539	Myosin 31DF (Myo31DF). Human myosin ID (MYO1D) ortholog. HGNC:7598.
102446	CG43164	nw	Negative		-	Negative		-	Negative		http://flybase.org/reports/FBgn0283508.html	http://www.omim.org/entry/167770	narrow (nw). Low DIOPT.
103406	CG10212	SMC2	Negative		-	Negative		-	Negative		http://flybase.org/reports/FBgn0027783.html	http://www.omim.org/entry/605576	Structural maintenance of chromosomes 2 (SMC2).
103906	CG3715	Shc	Negative		-	Negative		-	Negative		http://flybase.org/reports/FBgn0015296.html	http://www.omim.org/entry/600560	SHC-adaptor protein (Shc).
105855	CG3524	FASN2	Negative		-	Positive		No	Negative		http://flybase.org/reports/FBgn0042627.html	http://www.omim.org/entry/600212	Fatty acid synthase 2 (FASN2).
103359	CG1907	CG1907	Negative		-	Negative		-	Negative		http://flybase.org/reports/FBgn0039674.html	http://www.omim.org/entry/604165
105157	CG32417	Myt1	Negative		-	Negative		-	Negative		http://flybase.org/reports/FBgn0040298.html	http://www.omim.org/entry/602474
105780	CG6034	CG6034	Negative		-	Negative		-	Negative		http://flybase.org/reports/FBgn0036750.html	http://www.omim.org/entry/613081
104533	CG33472	qvr	Negative		-	Negative		-	Negative		http://flybase.org/reports/FBgn0260499.html		quiver (qvr). No human ortholog.
107352	CG3273	sced	Negative		-	Negative		-	Negative		http://flybase.org/reports/FBgn0013732.html		scrambled (sced). No human ortholog.
106186	CG15266	l(2)35Cc	Negative		-	Negative		-	Negative		http://flybase.org/reports/FBgn0259982.html	http://www.omim.org/entry/300234	lethal (2) 35Cc (l(2)35Cc).
105837	CG33208	Mical	Negative		-	Negative		-	Negative		http://flybase.org/reports/FBgn0053208.html	http://www.omim.org/entry/608881	Molecule interacting with CasL (Mical).
110485	CG7460	CG7460	Negative		-	Negative		-	Negative		http://flybase.org/reports/FBgn0036749.html	http://www.omim.org/entry/615853
107314	CG3924	Chi	Negative		-	Negative		-	Negative		http://flybase.org/reports/FBgn0013764.html	http://www.omim.org/entry/603450	Chip (Chi).
105149	CG10565	http://flybase.org/reports/FBgn0037051.html	Negative		-	Negative		-	Negative		http://flybase.org/reports/FBgn0037051.html	http://www.omim.org/entry/605502
106200	CG3051	AMPKalpha	Negative		-	Negative		-	Negative		http://flybase.org/reports/FBgn0023169.html	http://www.omim.org/entry/600497	AMP-activated protein kinase ? subunit (AMPKalpha)
107907	CG9160	ND-ACP	Negative		-	Negative		-	Negative		http://flybase.org/reports/FBgn0011361.html	http://www.omim.org/entry/603836	NADH dehydrogenase (ubiquinone) acyl carrier protein (ND-ACP).
106169	CG7066	Sbp2	Negative		-	Negative		-	Negative		http://flybase.org/reports/FBgn0087039.html	http://www.omim.org/entry/607693	SECIS-binding protein 2 (Sbp2).
105769	CG11015	COX5B	Negative		-	Negative		-	Negative		http://flybase.org/reports/FBgn0031830.html	http://www.omim.org/entry/123866	Cytochrome c oxidase subunit 5B (COX5B).
106191	CG3776	CG3776	Negative		-	Negative		-	Negative		http://flybase.org/reports/FBgn0035088.html	http://www.omim.org/entry/617267
103416	CG8174	SRPK	Negative		-	Positive	http://www.iiserpune.ac.in/rnai/uploads/research/636/images/c627e_KK103416.jpg	No	Negative		http://flybase.org/reports/FBgn0026370.html	http://www.omim.org/entry/601939	SR Protein Kinase (SRPK).
100617	CG10340	CG10340	Negative		-	Negative		-	Negative		http://flybase.org/reports/FBgn0022344.html	http://www.omim.org/entry/608917
104031	CG12766	CG12766	Negative		-	Negative		-	Negative		http://flybase.org/reports/FBgn0035476.html	http://www.omim.org/entry/103830
110476	CG11360	CG11360	Negative		-	Negative		-	Negative		http://flybase.org/reports/FBgn0039920.html	http://www.omim.org/entry/611005
103964	CG10755	Cyp4ae1	Negative		-	Negative		-	Negative		http://flybase.org/reports/FBgn0015036.html	http://www.omim.org/entry/608614	Cytochrome P450-4ae1 (Cyp4ae1).
103276	CG2064	CG2064	Negative		-	Negative		-	Negative		http://flybase.org/reports/FBgn0033205.html	http://www.omim.org/entry/607849
104489	CG8057	alc	Negative		-	Negative		-	Negative		http://flybase.org/reports/FBgn0260972.html	http://www.omim.org/entry/602740	alicorn (alc).
104445	CG1869	Cht7	Negative		-	Negative		-	Negative		http://flybase.org/reports/FBgn0035398.html	http://www.omim.org/entry/606080	Chitinase 7 (Cht7).
107364	CG32499	Cda4	Negative		-	Negative		-	Negative		http://flybase.org/reports/FBgn0052499.html		Chitin deacetylase-like 4 (Cda4). No human ortholog.
105201	CG1130	scrt	Negative		-	Positive	http://www.iiserpune.ac.in/rnai/uploads/research/645/images/891da_KK105201.jpg	No	Negative		http://flybase.org/reports/FBgn0004880.html	http://www.omim.org/entry/605858	scratch (scrt).
104557	CG14704	PGRP-LB	Negative		-	Negative		-	Negative		http://flybase.org/reports/FBgn0037906.html	http://www.omim.org/entry/608199	Peptidoglycan recognition protein LB (PGRP-LB).
106185	CG10052	Rx	Negative		-	Negative		-	Negative		http://flybase.org/reports/FBgn0020617.html	http://www.omim.org/entry/601881	Retinal Homeobox (Rx).
105781	CG10243	Cyp6a19	Negative		-	Negative		-	Negative		http://flybase.org/reports/FBgn0033979.html	http://www.omim.org/entry/274180	Cyp6a19 (Cyp6a19).
103934	CG3270	CG3270	Negative		-	Negative		-	Negative		http://flybase.org/reports/FBgn0033093.html	http://www.omim.org/entry/613622
107267	CG5642	eIF3l	Negative		-	Negative		-	Negative		http://flybase.org/reports/FBgn0036258.html		eukaryotic translation initiation factor 3 subunit l (eIF3l). Human eukaryotic translation initiation factor 3 subunit L (EIF3L) ortholog. HGNC:18138.
104051	CG6620	aurB	Negative		-	Negative		-	Negative		http://flybase.org/reports/FBgn0024227.html	http://www.omim.org/entry/603495	aurora B (aurB).
106217	CG5227	sdk	Negative		-	Negative		-	Negative		http://flybase.org/reports/FBgn0021764.html	http://www.omim.org/entry/607217	sidekick (sdk).
105179	CG10654	CG10654	Negative		-	Negative		-	Negative		http://flybase.org/reports/FBgn0036294.html
100241	CG15035	CG15035	Negative		-	Negative		-	Negative		http://flybase.org/reports/FBgn0029949.html	http://www.omim.org/entry/609668
100206	CG32751	CG32751	Negative		-	Negative		-	Negative		http://flybase.org/reports/FBgn0052751.html	http://www.omim.org/entry/609019
100261	CG11921	fd96Ca	Negative		-	Negative		-	Negative		http://flybase.org/reports/FBgn0004897.html		forkhead domain 96Ca (fd96Ca). Human forkhead box B2 (FOXB2) ortholog.
100218	CG32849	Hex-t2	Negative		-	Negative		-	Negative		http://flybase.org/reports/FBgn0042710.html	http://www.omim.org/entry/138079	Hex-t2 (Hex-t2).
106910	CG8289	CG8289	Negative		-	Negative		-	Negative		http://flybase.org/reports/FBgn0030854.html
104974	CG14358	CCHa1	Negative		-	Negative		-	Negative		http://flybase.org/reports/FBgn0038199.html		CCHamide-1 (CCHa1). No human ortholog.
106249	CG9423	Kap-alpha3	Negative		-	Negative		-	Negative		http://flybase.org/reports/FBgn0027338.html	http://www.omim.org/entry/602970	karyopherin alpha3 (Kap-alpha3)
103207	CG11529	CG11529	Negative		-	Negative		-	Negative		http://flybase.org/reports/FBgn0036264.html		No human ortholog.
105821	CG31743	CG31743	Negative		-	Negative		-	Negative		http://flybase.org/reports/FBgn0032618.html	http://www.omim.org/entry/610128
108855	CG3194	Hsepi	Negative		-	Negative		-	Negative		http://flybase.org/reports/FBgn0033087.html	http://www.omim.org/entry/612134	Heparan sulfate C5-epimerase (Hsepi).
100223	CG4725	CG4725	Negative		-	Negative		-	Negative		http://flybase.org/reports/FBgn0039022.html	http://www.omim.org/entry/610145
106005	CG17349	CG17349	Negative		-	Negative		-	Negative		http://flybase.org/reports/FBgn0032771.html		Human PARK2 coregulated like (PACRGL) ortholog. HGNC:28442.
107049	CG9735	TrpRS	Negative		-	Negative		-	Negative		http://flybase.org/reports/FBgn0010803.html	http://www.omim.org/entry/191050	Tryptophanyl-tRNA synthetase (TrpRS).
100237	CG2528	CG2528	Negative		-	Negative		-	Negative		http://flybase.org/reports/FBgn0032969.html	http://www.omim.org/entry/600400
108875	CG8397	CG8397	Negative		-	Negative		-	Negative		http://flybase.org/reports/FBgn0034066.html		Human ER membrane protein complex subunit 7 (EMC7) ortholog. HGNC:24301.
110608	CG8256	Gpo-1	Negative		-	Negative		-	Negative		http://flybase.org/reports/FBgn0022160.html	http://www.omim.org/entry/138430	Glycerophosphate oxidase-1 (Gpo-1).
108839	CG5380	CG5380	Negative		-	Negative		-	Negative		http://flybase.org/reports/FBgn0038951.html		Human RNA polymerase III subunit F (POLR3F) ortholog. HGNC:15763.
107453	CG33278	CG33278	Negative		-	Negative		-	Negative		http://flybase.org/reports/FBgn0053278.html
101887	CG9653	brk	Positive	http://www.iiserpune.ac.in/rnai/uploads/research/672/images/8d266_101887KK.jpg	No	Positive	http://www.iiserpune.ac.in/rnai/uploads/research/672/images/b87f5_KK101887.jpg	No	Negative		http://flybase.org/reports/FBgn0024250.html		brinker (brk). No human ortholog.
100227	CG7670	WRNexo	Negative		-	Positive		No	Negative		http://flybase.org/reports/FBgn0038608.html	http://www.omim.org/entry/604611	WRN exonuclease (WRNexo).
100389	CG5034	GATAd	Negative		-	Negative		-	Negative		http://flybase.org/reports/FBgn0032223.html	http://www.omim.org/entry/600576	GATAd (GATAd).
106011	CG32570	TwdlY	Negative		-	Negative		-	Negative		http://flybase.org/reports/FBgn0052570.html		TweedleY (TwdlY). No human ortholog.
100251	CG15757	Cpr12A	Negative		-	Positive		No	Negative		http://flybase.org/reports/FBgn0030494.html		Cuticular protein 12A (Cpr12A). No human ortholog.
107075	CG7993	Non3	Negative		-	Negative		-	Negative		http://flybase.org/reports/FBgn0038585.html		Novel nucleolar protein 3 (Non3). Human ribosome production factor 2 homolog (RPF2). HGNC:20870.
100234	CG13078	CG13078	Negative		-	Negative		-	Negative		http://flybase.org/reports/FBgn0032809.html		Human cytochrome b561 family member D1 (CYB561D1) ortholog. HGNC:26804.
107641	CG3050	Cyp6d5	Negative		-	Negative		-	Negative		http://flybase.org/reports/FBgn0038194.html	http://www.omim.org/entry/274180	Cyp6d5 (Cyp6d5).
107769	CG31224	CG31224	Negative		-	Negative		-	Negative		http://flybase.org/reports/FBgn0051224.html
100190	CG31755	SoYb	Negative		-	Negative		-	Negative		http://flybase.org/reports/FBgn0051755.html		Sister of Yb (SoYb). Human tudor domain containing 12 (TDRD12) ortholog. HGNC:25044.
108192	CG13833	CG13833	Negative		-	Negative		-	Negative		http://flybase.org/reports/FBgn0039040.html	http://www.omim.org/entry/608989
100208	CG18745	CG18745	Negative		-	Negative		-	Negative		http://flybase.org/reports/FBgn0042102.html		Human arrestin domain containing 4 (ARRDC4) ortholog. HGNC:28087.
105562	CG3244	Clect27	Negative		-	Negative		-	Negative		http://flybase.org/reports/FBgn0031629.html	http://www.omim.org/entry/153240	C-type lectin 27kD (Clect27). Low DIOPT score.
100248	CG5866	CG5866	Negative		-	Negative		-	Negative		http://flybase.org/reports/FBgn0038508.html		No human ortholog.
108604	CG15629	CG15629	Negative		-	Negative		-	Negative		http://flybase.org/reports/FBgn0031630.html	http://www.omim.org/entry/607599
100184	CG18649	CG18649	Negative		-	Negative		-	Negative		http://flybase.org/reports/FBgn0036469.html		No human ortholog.
108085	CG3885	Sec3	Negative		-	Negative		-	Negative		http://flybase.org/reports/FBgn0266669.html	http://www.omim.org/entry/607879	Secretory 3 (Sec3).
104701	CG4803	Takl2	Negative		-	Negative		-	Negative		http://flybase.org/reports/FBgn0039015.html	http://www.omim.org/entry/602614	Tak1-like 2 (Takl2).
105595	CG13417	Gr93a	Negative		-	Negative		-	Negative		http://flybase.org/reports/FBgn0041229.html		Gustatory receptor 93a (Gr93a). No human ortholog.
100256	CG9582	CG9582	Negative		-	Negative		-	Negative		http://flybase.org/reports/FBgn0032090.html	http://www.omim.org/entry/607571
105551	CG10912	CG10912	Negative		-	Negative		-	Negative		http://flybase.org/reports/FBgn0034296.html		No human ortholog.
103641	CG5876	heix	Negative		-	Negative		-	Negative		http://flybase.org/reports/FBgn0028375.html	http://www.omim.org/entry/611632	heixuedian (heix).
106629	CG4882	CG4882	Negative		-	Negative		-	Negative		http://flybase.org/reports/FBgn0025336.html	http://www.omim.org/entry/611989
106628	CG1464	ey	Negative		-	Negative		-	Negative		http://flybase.org/reports/FBgn0005558.html	http://www.omim.org/entry/607108	eyeless (ey).
107818	CG18273	CG18273	Negative		-	Negative		-	Negative		http://flybase.org/reports/FBgn0029525.html		No human ortholog.
100221	CG7800	CG7800	Negative		-	Negative		-	Negative		http://flybase.org/reports/FBgn0037552.html	http://www.omim.org/entry/603029	Low DIOPT score.
105580	CG12010	CG12010	Negative		-	Negative		-	Negative		http://flybase.org/reports/FBgn0035443.html		Human permatogenesis associated 5 like 1 (SPATA5L1) ortholog. HGNC:28762.
105587	CG9733	CG9733	Negative		-	Negative		-	Negative		http://flybase.org/reports/FBgn0039759.html		No human ortholog.
110630	CG3350	bigmax	Negative		-	Negative		-	Negative		http://flybase.org/reports/FBgn0039509.html	http://www.omim.org/entry/602976	bigmax (bigmax).
106631	CG6012	CG6012	Negative		-	Negative		-	Negative		http://flybase.org/reports/FBgn0032615.html		Human hydroxysteroid dehydrogenase like 1 (HSDL1) ortholog. HGNC:16475.
105966	CG13957	SWIP	Negative		-	Negative		-	Negative		http://flybase.org/reports/FBgn0053287.html	http://www.omim.org/entry/615748	Strumpellin and WASH-interacting protein (SWIP).
110802	CG7113	scu	Negative		-	Positive		No	Negative		http://flybase.org/reports/FBgn0021765.html	http://www.omim.org/entry/300256	scully (scu).
108422	CG4491	noc	Negative		-	Negative		-	Negative		http://flybase.org/reports/FBgn0005771.html	http://www.omim.org/entry/613902	no ocelli (noc).
106031	CG15646	CG15646	Negative		-	Negative		-	Negative		http://flybase.org/reports/FBgn0030665.html		No human ortholog.
100198	CG31976	ovm	Negative		-	Negative		-	Negative		http://flybase.org/reports/FBgn0051976.html		oven mitt (ovm). No human ortholog.
107985	CG3216	CG3216	Negative		-	Negative		-	Negative		http://flybase.org/reports/FBgn0034568.html	http://www.omim.org/entry/108960
107526	CG13024	CG13024	Negative		-	Negative		-	Negative		http://flybase.org/reports/FBgn0036665.html
101410	CG6852	CG6852	Negative		-	Negative		-	Negative		http://flybase.org/reports/FBgn0036665.html	http://www.omim.org/entry/606820
107974	CG31235	CG31235	Negative		-	Negative		-	Negative		http://flybase.org/reports/FBgn0051235.html	http://www.omim.org/entry/616157
107422	CG11567	Cpr	Negative		-	Negative		-	Negative		http://flybase.org/reports/FBgn0015623.html	http://www.omim.org/entry/124015	Cytochrome P450 reductase (Cpr).
108162	CG16965	CG16965	Negative		-	Negative		-	Negative		http://flybase.org/reports/FBgn0032387.html	http://www.omim.org/entry/617032
108556	CG7842	beg	Negative		-	Negative		-	Negative		http://flybase.org/reports/FBgn0036691.html	http://www.omim.org/entry/614479	bad egg (beg).
108615	CG7033	CCT2	Negative		-	Negative		-	Negative		http://flybase.org/reports/FBgn0030086.html	http://www.omim.org/entry/605139	Chaperonin containing TCP1 subunit 2 (CCT2).
110170	CG8282	Snx6	Negative		-	Negative		-	Negative		http://flybase.org/reports/FBgn0032005.html	http://www.omim.org/entry/606098	Sorting nexin 6 (Snx6).
103417	CG6975	gigas	Negative		-			-	Negative
103622	CG31852	Tap42	Positive	http://www.iiserpune.ac.in/rnai/uploads/research/721/images/84540_KK103622.jpg	Yes	Negative		-	Negative		http://flybase.org/reports/FBgn0051852.html	http://omim.org/entry/300139	Two A-associated protein of 42kDa (Tap42).
109783	CG16827	ItgaPS4	Negative		-	Negative		-	Negative		http://flybase.org/reports/FBgn0034005.html	http://www.omim.org/entry/192975	Integrin alphaPS4 subunit (ItgaPS4).
104179	CG2699	Pi3K21B	Negative		-	Negative		-	Positive		http://flybase.org/reports/FBgn0020622.html	http://www.omim.org/entry/606076	Pi3K21B (Pi3K21B).
109881	CG10697	Ddc	Negative		-	Negative		-	Negative		http://flybase.org/reports/FBgn0000422.html	http://www.omim.org/entry/107930	Dopa decarboxylase (Ddc).
101407	CG4356	mAChR-A	Negative		-	Positive		No	Negative		http://flybase.org/reports/FBgn0000037.html	http://www.omim.org/entry/118510	muscarinic Acetylcholine Receptor, A-type (mAChR-A).
103385	CG5452	dnk	Negative		-	Negative		-	Negative		http://flybase.org/reports/FBgn0022338.html	http://www.omim.org/entry/188250	deoxynucleoside kinase (dnk).
106757	CG6455	Mitofilin	Negative		-	Negative		-	Negative		http://flybase.org/reports/FBgn0019960.html	http://www.omim.org/entry/600378	Mitofilin (Mitofilin).
107207	CG4012	gek	Negative		-	Negative		-	Negative		http://flybase.org/reports/FBgn0023081.html	http://www.omim.org/entry/603412	genghis khan (gek).
108356	CG9374	Lkb1	Negative		-	Negative		-	Negative		http://flybase.org/reports/FBgn0038167.html	http://www.omim.org/entry/602216	Lkb1 kinase (Lkb1).
107927	CG6930	l(3)neo38	Negative		-	Negative		-	Negative		http://flybase.org/reports/FBgn0265276.html		lethal (3) neo38 (l(3)neo38).
106049	CG1828	dre4	Negative		-	Negative		-	Negative		http://flybase.org/reports/FBgn0002183.html	http://www.omim.org/entry/605012	dre4 (dre4).
106712	CG9357	Cht8	Negative		-	Negative		-	Negative		http://flybase.org/reports/FBgn0034580.html	http://www.omim.org/entry/601525	Chitinase 8 (Cht8).
110353	CG11186	toy	Negative		-	Negative		-	Negative		http://flybase.org/reports/FBgn0019650.html	http://www.omim.org/entry/607108	twin of eyeless (toy).
109278	CG34069	mt:CoII	Negative		-	Negative		-	Negative		http://flybase.org/reports/FBgn0013675.html	http://www.omim.org/entry/516040	mitochondrial Cytochrome c oxidase subunit II (mt:CoII).
109263	CG34089	mt:ND6	Negative		-	Negative		-	Negative		http://flybase.org/reports/FBgn0013685.html	http://www.omim.org/entry/516006	mitochondrial NADH-ubiquinone oxidoreductase chain 6 (mt:ND6). Low DIOPT score.
109812	CG1210	Pdk1	Negative		-	Negative		-	Negative		http://flybase.org/reports/FBgn0020386.html	http://www.omim.org/entry/605213	Phosphoinositide-dependent kinase 1 (Pdk1). Human 3-phosphoinositide dependent protein kinase 1 (PDPK1) ortholog. OMIM: 605213.
101117	CG12028	dib	Negative		-	Negative		-	Negative		http://flybase.org/reports/FBgn0000449.html	http://www.omim.org/entry/126065	disembodied (dib).
107939	CG42256	Dscam2	Negative		-	Negative		-	Negative		http://flybase.org/reports/FBgn0265296.html	http://www.omim.org/entry/602523	Down syndrome cell adhesion molecule 2 (Dscam2).
106753	CG4307	ATPsynO	Negative		-	Negative		-	Negative		http://flybase.org/reports/FBgn0016691.html	http://www.omim.org/entry/600828	ATP synthase, oligomycin sensitivity conferring protein (ATPsynO).
106170	CG4199	CG4199	Negative		-	Negative		-	Negative		http://flybase.org/reports/FBgn0025628.html	http://www.omim.org/entry/617298
108123	CG16728	Git	Negative		-	Negative		-	Negative		http://flybase.org/reports/FBgn0033539.html	http://www.omim.org/entry/608564	G protein-coupled receptor kinase interacting ArfGAP (Git).
106043	CG1041	CRAT	Negative		-	Negative		-	Negative		http://flybase.org/reports/FBgn0037440.html	http://www.omim.org/entry/600184	Carnitine O-Acetyl-Transferase (CRAT).
107935	CG18783	CG18783	Negative		-	Negative		-	Negative		http://flybase.org/reports/FBgn0266445.html		Alias CG45075. No human ortholog.
109790	CG34356	bma	Negative		-	Negative		-	Negative		http://flybase.org/reports/FBgn0085385.html	http://www.omim.org/entry/616365	black match (bma).
108359	CG6578	phm	Negative		-	Negative		-	Negative		http://flybase.org/reports/FBgn0004959.html	http://www.omim.org/entry/608055	phantom (phm).
100517	CG7409	CG7409	Negative		-	Negative		-	Negative		http://flybase.org/reports/FBgn0035817.html	http://www.omim.org/entry/602179
100449	CG8565	CG8565	Negative		-	Negative		-	Negative		http://flybase.org/reports/FBgn0030697.html		Human SRSF protein kinase 3 (SRPK3) ortholog. HGNC:11402.
100778	CG8069	Phax	Negative		-	Negative		-	Negative		http://flybase.org/reports/FBgn0033380.html	http://www.omim.org/entry/604924	Phosphorylated adaptor for RNA export (Phax).
107381	CG1786	Cyp318a1	Negative		-	Negative		-	Negative		http://flybase.org/reports/FBgn0030369.html	http://www.omim.org/entry/604087	Cyp318a1 (Cyp318a1). Human cytochrome P450 family 46 subfamily A member 1 (CYP46A1) ortholog. OMIM: 604087.
110395	CG1749	Uba5	Negative		-	Negative		-	Negative		http://flybase.org/reports/FBgn0030305.html	http://www.omim.org/entry/610552	Ubiquitin activating enzyme 5 (Uba5). Human ubiquitin like modifier activating enzyme 5 (UBA5) ortholog. OMIM:610552.
100522	CG31021	CG31021	Negative		-	Negative		-	Negative		http://flybase.org/reports/FBgn0051021.html	http://www.omim.org/entry/176710
108620	CG32435	chb	Negative		-	Negative		-	Negative		http://flybase.org/reports/FBgn0021760.html	http://www.omim.org/entry/605852	chromosome bows (chb).
108385	CG7601	CG7601	Negative		-	Negative		-	Negative		http://flybase.org/reports/FBgn0027583.html	http://www.omim.org/entry/616160
107194	CG5893	D	Negative		-	Negative		-	Negative		http://flybase.org/reports/FBgn0000411.html	http://www.omim.org/entry/604974	Dichaete (D).
106700	CG10396	COX4L	Negative		-	Negative		-	Negative		http://flybase.org/reports/FBgn0033020.html	http://www.omim.org/entry/123864	Cytochrome c oxidase subunit 4-like (COX4L).
108383	CG12534	Alr	Negative		-	Negative		-	Negative		http://flybase.org/reports/FBgn0031068.html	http://www.omim.org/entry/600924	Augmenter of liver regeneration (Alr).
106083	CG2887	CG2887	Negative		-	Negative		-	Negative		http://flybase.org/reports/FBgn0030207.html	http://www.omim.org/entry/611328
100189	CG4058	Nep4	Negative		-	Negative		-	Negative		http://flybase.org/reports/FBgn0038818.html		Neprilysin 4 (Nep4). Human membrane metalloendopeptidase like 1 (MMEL1) ortholog. HGNC:14668.
109834	CG17612	CG17612	Negative		-	Negative		-	Negative		http://flybase.org/reports/FBgn0031597.html
108376	CG5705	mRF1	Negative		-	Negative		-	Negative		http://flybase.org/reports/FBgn0032486.html	http://www.omim.org/entry/613542	mitochondrial translation release factor 1 (mRF1).
106704	CG15514	CG15514	Negative		-	Negative		-	Negative		http://flybase.org/reports/FBgn0039712.html		No human ortholog.
106181	CG8704	dpn	Negative		-	Negative		-	Negative		http://flybase.org/reports/FBgn0010109.html	http://www.omim.org/entry/139605	deadpan (dpn).
106759	CG17903	Cyt-c-p	Negative		-	Negative		-	Negative		http://flybase.org/reports/FBgn0000409.html	http://www.omim.org/entry/123970	Cytochrome c proximal (Cyt-c-p).
106695	CG3608	Adck	Negative		-	Negative		-	Negative		http://flybase.org/reports/FBgn0035039.html		aarF domain containing kinase (Adck). Human aarF domain containing kinase 1 (ADCK1) ortholog. HGNC:19038.
107902	CG4163	Cyp303a1	Negative		-	Negative		-	Negative		http://flybase.org/reports/FBgn0001992.html	http://www.omim.org/entry/123930	Cyp303a1 (Cyp303a1).
106741	CG3301	CG3301	Negative		-	Negative		-	Negative		http://flybase.org/reports/FBgn0038878.html	http://www.omim.org/entry/616159
108143	CG10478	alphaKap4	Negative		-	Negative		-	Negative		http://flybase.org/reports/FBgn0035657.html	http://www.omim.org/entry/602970	alphaKaryopherin-4 (alphaKap4).
106091	CG12233	l(1)G0156	Negative		-	Negative		-	Negative		http://flybase.org/reports/FBgn0027291.html	http://www.omim.org/entry/601149	lethal (1) G0156 (l(1)G0156).
106774	CG5408	trbl	Negative		-	Negative		-	Negative		http://flybase.org/reports/FBgn0028978.html	http://www.omim.org/entry/609462	tribbles (trbl).
106632	CG6948	Clc	Negative		-	Negative		-	Negative		http://flybase.org/reports/FBgn0024814.html	http://www.omim.org/entry/118960	Clathrin light chain (Clc).
105324	CG18741	Dop1R2	Negative		-	Negative		-	Negative		http://flybase.org/reports/FBgn0266137.html	http://www.omim.org/entry/109630	Dopamine 1-like receptor 2 (Dop1R2).
100277	CG4043	Rrp46	Negative		-	Negative		-	Negative		http://flybase.org/reports/FBgn0037815.html	http://www.omim.org/entry/606492
108925	CG6172	vnd	Negative		-	Negative		-	Negative		http://flybase.org/reports/FBgn0261930.html	http://www.omim.org/entry/604612	ventral nervous system defective (vnd).
104132	CG12275	RpS10a	Negative		-	Negative		-	Negative		http://flybase.org/reports/FBgn0027494.html	http://www.omim.org/entry/603632	Ribosomal protein S10a (RpS10a).
109398	CG9699	Sep-04	Negative		-	Negative		-	Negative		http://flybase.org/reports/FBgn0259923.html	http://www.omim.org/entry/603696	Septin 4 (Sep4).
101238	CG10101	Ir84a	Negative		-	Negative		-	Negative		http://flybase.org/reports/FBgn0037501.html		Ionotropic receptor 84a (Ir84a).
108797	CG7145	P5CDh1	Negative		-	Negative		-	Negative		http://flybase.org/reports/FBgn0037138.html	http://www.omim.org/entry/606811	delta-1-Pyrroline-5-carboxylate dehydrogenase 1 (P5CDh1).
110152	CG5992	Adgf-A	Negative		-	Negative		-	Negative		http://flybase.org/reports/FBgn0036752.html	http://www.omim.org/entry/607575	Adenosine deaminase-related growth factor A (Adgf-A).
110125	CG17170	su(f)	Negative		-	Negative		-	Negative		http://flybase.org/reports/FBgn0003559.html	http://www.omim.org/entry/600367	suppressor of forked (su(f)).
101084	CG7627	CG7627	Negative		-	Negative		-	Negative		http://flybase.org/reports/FBgn0032026.html	http://www.omim.org/entry/605250
102171	CG5338	RpS19b	Negative		-	Negative		-	Negative		http://flybase.org/reports/FBgn0039129.html	http://www.omim.org/entry/603474	Ribosomal protein S19b (RpS19b).
102804	CG13995	CG13995	Negative		-	Negative		-	Negative		http://flybase.org/reports/FBgn0031770.html
102192	CG3915	Drl-2	Negative		-	Negative		-	Negative		http://flybase.org/reports/FBgn0033791.html	http://www.omim.org/entry/600524	Derailed 2 (Drl-2).
102039	CG32540	CCKLR-17D3	Negative		-	Negative		-	Negative		http://flybase.org/reports/FBgn0030954.html	http://www.omim.org/entry/118444	Cholecystokinin-like receptor at 17D3 (CCKLR-17D3).
110479	CG8646	CG8646	Negative		-	Negative		-	Negative		http://flybase.org/reports/FBgn0033763.html	http://www.omim.org/entry/610009
110022	CG13579	CG13579	Negative		-	Negative		-	Negative		http://flybase.org/reports/FBgn0035010.html
106187	CG7951	sima	Negative		-	Negative		-	Negative		http://flybase.org/reports/FBgn0266411.html	http://www.omim.org/entry/603348	similar (sima).
106570	CG11348	nAChRbeta1	Negative		-	Negative		-	Negative		http://flybase.org/reports/FBgn0000038.html	http://www.omim.org/entry/100710	nicotinic Acetylcholine Receptor beta 1 (nAChRbeta1).
101845	CG8985	MsR1	Negative		-	Negative		-	Negative		http://flybase.org/reports/FBgn0035331.html		Myosuppressin receptor 1 (MsR1).
102221	CG30092	jbug	Negative		-	Negative		-	Negative		http://flybase.org/reports/FBgn0028371.html	http://www.omim.org/entry/300017	jitterbug (jbug).
100157	CG11390	EbpIII	Positive		Yes	Negative		-	Negative		http://flybase.org/reports/FBgn0011695.html		Ejaculatory bulb protein III (EbpIII). No human ortholog.
110734	CG16912	TyrRS-m	Negative		-	Negative		-	Negative		http://flybase.org/reports/FBgn0035064.html	http://www.omim.org/entry/610957	Tyrosyl-tRNA synthetase, mitochondrial (TyrRS-m).
100153	CG42674	CG42674	Negative		-	Negative		-	Negative		http://flybase.org/reports/FBgn0261556.html	http://www.omim.org/entry/611101
102320	CG4982	CG4982	Negative		-	Negative		-	Negative		http://flybase.org/reports/FBgn0036598.html		No human ortholog.
103612	CG11780	beta4GalT7	Negative		-	Negative		-	Negative		http://flybase.org/reports/FBgn0039258.html	http://www.omim.org/entry/604327	beta-4-galactosyltransferase 7 (beta4GalT7).
100175	CG5224	GstE11	Negative		-	Negative		-	Negative		http://flybase.org/reports/FBgn0034354.html		Glutathione S transferase E11 (GstE11).
108967	CG17084	mthl9	Negative		-	Negative		-	Negative		http://flybase.org/reports/FBgn0035131.html		methuselah-like 9 (mthl9).
101051	CG14387	d-cup	Negative		-	Positive		No	Negative		http://flybase.org/reports/FBgn0038089.html		davis-cup (d-cup). Human EF-hand calcium binding domain 1 (EFCAB1) ortholog. HGNC:25678.
102219	CG15115	CG15115	Negative		-	Negative		-	Negative		http://flybase.org/reports/FBgn0034413.html		No human ortholog.
110781	CG18769	MCU	Negative		-	Negative		-	Negative		http://flybase.org/reports/FBgn0042185.html	http://www.omim.org/entry/614197	Mitochondrial calcium uniporter (MCU).
100137	CG5623	CG5623	Negative		-	Negative		-	Negative		http://flybase.org/reports/FBgn0038357.html		No human ortholog.
101153	CG9138	uif	Negative		-	Negative		-	Negative		http://flybase.org/reports/FBgn0031879.html	http://www.omim.org/entry/611691	uninflatable (uif).
100225	CG10725	CG10725	Negative		-	Negative		-	Negative		http://flybase.org/reports/FBgn0036362.html		No human ortholog.
101145	CG9317	CarT	Negative		-	Negative		-	Negative		http://flybase.org/reports/FBgn0032879.html	http://www.omim.org/entry/604842	Carcinine transporter (CarT).
102151	CG17814	Peritrophin-15a	Negative		-	Negative		-	Negative		http://flybase.org/reports/FBgn0040959.html		Peritrophin-15a (Peritrophin-15a). No human ortholog.
108048	CG16992	mthl6	Negative		-	Negative		-	Negative		http://flybase.org/reports/FBgn0035789.html		methuselah-like 6 (mthl6). No human ortholog.
101198	CG7201	CG7201	Negative		-	Negative		-	Negative		http://flybase.org/reports/FBgn0035865.html		No human ortholog.
101184	CG15343	CG15343	Negative		-	Negative		-	Negative		http://flybase.org/reports/FBgn0030029.html	http://www.omim.org/entry/603287
109888	CG33080	CG33080	Negative		-	Negative		-	Negative		http://flybase.org/reports/FBgn0053080.html		Human KIAA1161 (KIAA1161) ortholog. HGNC:19918.
102358	CG30411	CG30411	Negative		-	Negative		-	Negative		http://flybase.org/reports/FBgn0050411.html		No human ortholog.
100213	CG18262	CG18262	Negative		-	Negative		-	Negative		http://flybase.org/reports/FBgn0030012.html
107344	CG11579	arm	Negative		-	Negative		-	Negative		http://flybase.org/reports/FBgn0000117.html	http://www.omim.org/entry/116806	armadillo (arm).
101288	CG7138	r2d2	Negative		-	Negative		-	Negative		http://flybase.org/reports/FBgn0031951.html	http://www.omim.org/entry/605920	r2d2 (r2d2).
102226	CG6457	yip7	Negative		-	Negative		-	Negative		http://flybase.org/reports/FBgn0040060.html	http://www.omim.org/entry/176820	yippee interacting protein 7 (yip7).
102362	CGnone	-			-	Negative		-	Negative
108103	CG16947	CG16947	Negative		-	Negative		-	Negative		http://flybase.org/reports/FBgn0031816.html	http://www.omim.org/entry/607680
107572	CG3157	gammaTub23C	Negative		-	Negative		-	Negative		http://flybase.org/reports/FBgn0260639.html	http://www.omim.org/entry/605785	gamma-Tubulin at 23C (gammaTub23C).
110076	CG17161	grapes			-			-	Negative
108340	CG31812	CG31812	Negative		-	Negative		-	Negative		http://flybase.org/reports/FBgn0051812.html	http://www.omim.org/entry/608753
101275	CG34395	nub	Negative		-	Negative		-	Negative		http://flybase.org/reports/FBgn0085424.html	http://www.omim.org/entry/164175	nubbin (nub).
102128	CG8757	CG8757	Negative		-	Negative		-	Negative		http://flybase.org/reports/FBgn0036380.html	http://www.omim.org/entry/616159
108709	CG8864	Cyp28a5	Negative		-	Negative		-	Negative		http://flybase.org/reports/FBgn0028940.html	http://www.omim.org/entry/274180	Cyp28a5 (Cyp28a5).
102201	CG14935	Mal-B2	Negative		-	Negative		-	Negative		http://flybase.org/reports/FBgn0032382.html	http://www.omim.org/entry/104614	Maltase B2 (Mal-B2).
101090	CG8276	bin3	Negative		-	Positive	http://www.iiserpune.ac.in/rnai/uploads/research/829/images/be2aa_KK101090.jpg	No	Negative		http://flybase.org/reports/FBgn0263144.html	http://www.omim.org/entry/611478	bicoid-interacting protein 3 (bin3).	http://www.iiserpune.ac.in/rnai/uploads/research/829/pptx/a23de_Bicoid-Interacting-Protein-3.pptx
108254	CG17090	Hipk	Negative		-	Negative		-	Negative		http://flybase.org/reports/FBgn0035142.html	http://www.omim.org/entry/606868	homeodomain interacting protein kinase (Hipk).
101252	CG1619	Hmr	Negative		-	Negative		-	Negative		http://flybase.org/reports/FBgn0001206.html		Hybrid male rescue (Hmr).
106823	CG8055	shrb	Negative		-	Negative		-	Negative		http://flybase.org/reports/FBgn0086656.html	http://www.omim.org/entry/610897	shrub (shrb).
108205	CG7006	CG7006	Negative		-	Negative		-	Negative		http://flybase.org/reports/FBgn0039233.html		Human NIP7, nucleolar pre-rRNA processing protein (NIP7) ortholog. HGNC:24328.
107803	CG12767	Dlip3	Negative		-	Negative		-	Negative		http://flybase.org/reports/FBgn0040465.html		Dorsal interacting protein 3 (Dlip3). No human ortholog.
107059	CG17166	mRpL39	Negative		-	Negative		-	Negative		http://flybase.org/reports/FBgn0036462.html	http://www.omim.org/entry/611845	mitochondrial ribosomal protein L39 (mRpL39).
110468	CG7433	Gabat	Negative		-	Negative		-	Negative		http://flybase.org/reports/FBgn0036927.html	http://www.omim.org/entry/137150	gamma-aminobutyric acid transaminase (Gabat).
102374	CG13388	Akap200	Negative		-	Negative		-	Negative		http://flybase.org/reports/FBgn0027932.html		A kinase anchor protein 200 (Akap200). No human ortholog.
100326	CG7417	Tab2	Negative		-	Negative		-	Negative		http://flybase.org/reports/FBgn0086358.html	http://www.omim.org/entry/300480	TAK1-associated binding protein 2 (Tab2).
100945	CG32436	CG32436	Negative		-	Negative		-	Negative		http://flybase.org/reports/FBgn0052436.html		No human ortholog.
103725	CG8866	protein_coding_gene	Negative		-	Negative		-	Negative		http://flybase.org/reports/FBgn0037679.html	http://www.omim.org/entry/613472
109854	CG13415	Cby	Negative		-	Negative		-	Negative		http://flybase.org/reports/FBgn0067317.html	http://www.omim.org/entry/607757	Chibby (Cby).
110090	CG17654	Eno	Negative		-	Negative		-	Negative		http://flybase.org/reports/FBgn0000579.html	http://www.omim.org/entry/172430	Enolase (Eno).
109169	CG6782	sea	Negative		-	Negative		-	Negative		http://flybase.org/reports/FBgn0037912.html	http://www.omim.org/entry/190315	scheggia (sea).
100136	CG3421	RhoGAP93B	Negative		-	Negative		-	Negative		http://flybase.org/reports/FBgn0038853.html	http://www.omim.org/entry/615880	Rho GTPase activating protein at 93B (RhoGAP93B).
102153	CG4558	CG4558	Negative		-	Negative		-	Negative		http://flybase.org/reports/FBgn0029914.html		No human ortholog.
100216	CG2104	CG2104	Negative		-	Negative		-	Negative		http://flybase.org/reports/FBgn0037365.html	http://www.omim.org/entry/600756
104199	CG4398	jtb	Negative		-	Negative		-	Negative		http://flybase.org/reports/FBgn0034126.html		jetboil (jtb). No human ortholog.
100993	CG13251	CG13251	Negative		-	Negative		-	Negative		http://flybase.org/reports/FBgn0037014.html		Human coiled-coil domain containing 66 (CCDC66) ortholog. HGNC:27709.
103044	CG9619	Gbs-76A	Negative		-	Negative		-	Negative		http://flybase.org/reports/FBgn0036862.html	http://www.omim.org/entry/603326	Glycogen binding subunit 76A (Gbs-76A).
110445	CG3480	mip130	Negative		-	Negative		-	Negative		http://flybase.org/reports/FBgn0023509.html	http://www.omim.org/entry/609375	Myb-interacting protein 130 (mip130).
109095	CG33695	CG33695	Negative		-	Negative		-	Negative		http://flybase.org/reports/FBgn0052831.html	http://www.omim.org/entry/617215
101143	CG12754	Or42b	Negative		-	Negative		-	Negative		http://flybase.org/reports/FBgn0033043.html		Odorant receptor 42b (Or42b). No human ortholog.
103061	CG14309	CG14309			-	Positive		No	Negative		http://flybase.org/reports/FBgn0038611.html	http://www.omim.org/entry/613469	Human heparanase 2 (inactive) (HPSE2) ortholog. HGNC:18374.
101265	CG31920	CG31920	Negative		-	Negative		-	Negative		http://flybase.org/reports/FBgn0264086.html		Alias CG43755. No human ortholog.
110359	CG8309	Tango7	Negative		-	Negative		-	Negative		http://flybase.org/reports/FBgn0033902.html	http://www.omim.org/entry/609641	Transport and Golgi organization 7 (Tango7).
100159	CG18285	igl	Negative		-	Negative		-	Negative		http://flybase.org/reports/FBgn0013467.html	http://www.omim.org/entry/608621	igloo (igl).
101280	CG13162	ana3	Negative		-	Negative		-	Negative		http://flybase.org/reports/FBgn0266111.html	http://www.omim.org/entry/610436	anastral spindle 3 (ana3).
101274	CG12078	CG12078	Negative		-	Negative		-	Negative		http://flybase.org/reports/FBgn0035426.html	http://www.omim.org/entry/610684
103141	CG8882	eIF3i	Negative		-	Positive		No	Negative		http://flybase.org/reports/FBgn0015834.html	http://www.omim.org/entry/603911	eukaryotic translation initiation factor 3 subunit i (eIF3i).
103597	CG3497	Su(H)	Negative		-	Negative		-	Negative		http://flybase.org/reports/FBgn0004837.html	http://www.omim.org/entry/147183	Suppressor of Hairless (Su(H)).
110340	CG1554	RpII215	Negative		-	Negative		-	Negative		http://flybase.org/reports/FBgn0003277.html	http://www.omim.org/entry/180660	RNA polymerase II 215kD subunit (RpII215).
109070	CG14724	COX5A	Negative		-	Negative		-	Negative		http://flybase.org/reports/FBgn0019624.html	http://www.omim.org/entry/603773	Cytochrome c oxidase subunit 5A (COX5A).
110344	CG32701	l(1)G0320	Negative		-	Negative		-	Negative		http://flybase.org/reports/FBgn0028327.html	http://www.omim.org/entry/600868	lethal (1) G0320 (l(1)G0320).
108186	CG17686	DIP1	Negative		-	Negative		-	Negative		http://flybase.org/reports/FBgn0024807.html	http://www.omim.org/entry/601218	DISCO Interacting Protein 1 (DIP1).
102329	CG42242	beat-VII	Negative		-	Negative		-	Negative		http://flybase.org/reports/FBgn0250908.html	http://www.omim.org/entry/609938	beat-VII (beat-VII). Low DIOPT score.
102127	CG32700	CG32700	Negative		-	Negative		-	Negative		http://flybase.org/reports/FBgn0267253.html		No human ortholog.
109838	CG4385	S	Negative		-	Negative		-	Negative		http://flybase.org/reports/FBgn0003310.html		Star (S). No human ortholog.
101161	CG14617	Cp110	Negative		-	Negative		-	Negative		http://flybase.org/reports/FBgn0031191.html	http://www.omim.org/entry/609544	Centriolar coiled coil protein 110kDa (Cp110).
101257	CG12169	Ppm1	Negative		-	Negative		-	Negative		http://flybase.org/reports/FBgn0035143.html	http://www.omim.org/entry/606108	Ppm1 (Ppm1).
102147	CG14456	CG14456	Negative		-	Negative		-	Negative		http://flybase.org/reports/FBgn0037176.html		No human ortholog.
101126	CG4875	Rcp	Negative		-	Negative		-	Negative		http://flybase.org/reports/FBgn0030801.html	http://www.omim.org/entry/606121	Receptor component protein (Rcp).
109418	CG3576	schlank	Negative		-	Negative		-	Negative		http://flybase.org/reports/FBgn0040918.html	http://www.omim.org/entry/615335	schlank (schlank).
100160	CG31882	CG31882	Negative		-	Negative		-	Negative		http://flybase.org/reports/FBgn0051882.html		No human ortholog.
103039	CG3870	RabX1	Negative		-	Negative		-	Negative		http://flybase.org/reports/FBgn0015372.html	http://www.omim.org/entry/605694	RabX1 (RabX1).
100991	CG14024	CG14024	Negative		-	Negative		-	Negative		http://flybase.org/reports/FBgn0031697.html	http://www.omim.org/entry/610191
100231	CG2269	CG2269	Negative		-	Negative		-	Negative		http://flybase.org/reports/FBgn0033484.html		No human ortholog.
104830	CG8886	l(2)05714	Negative		-	Negative		-	Negative		http://flybase.org/reports/FBgn0010607.html		lethal (2) 05714 (l(2)05714). No human ortholog.
100913	CG13484	CG13484	Negative		-	Negative		-	Negative		http://flybase.org/reports/FBgn0036406.html		No human ortholog.
110151	CG11799	FoxK	Negative		-	Negative		-	Negative		http://flybase.org/reports/FBgn0036134.html	http://www.omim.org/entry/147685	Forkhead box K (FoxK).
101094	CG13309	vlc	Negative		-	Negative		-	Negative		http://flybase.org/reports/FBgn0259978.html	http://www.omim.org/entry/103180	vulcan (vlc). No human ortholog.
110453	CG10053	CG10053	Negative		-	Negative		-	Negative		http://flybase.org/reports/FBgn0037490.html		Human G-patch domain containing 11 (GPATCH11) ortholog. HGNC:26768.
102005	CG12026	Tmhs	Negative		-	Negative		-	Negative		http://flybase.org/reports/FBgn0262624.html	http://www.omim.org/entry/610240	Tetraspan membrane protein in hair cell stereocilia (Tmhs).
102924	CG9906	Cnx14D	Negative		-	Negative		-	Negative		http://flybase.org/reports/FBgn0264077.html	http://www.omim.org/entry/114217	Calnexin 14D (Cnx14D).
102905	CG33512	dpr4	Negative		-	Negative		-	Negative		http://flybase.org/reports/FBgn0053512.html		defective proboscis extension response 4 (dpr4). Low DIOPT score.
102012	CG9881	Arpc5	Negative		-	Negative		-	Negative		http://flybase.org/reports/FBgn0031437.html	http://www.omim.org/entry/604227	Actin-related protein 2/3 complex, subunit 5 (Arpc5).
110259	CG10833	Cyp28d1	Negative		-	Negative		-	Negative		http://flybase.org/reports/FBgn0031689.html	http://www.omim.org/entry/274180	Cyp28d1 (Cyp28d1).
101962	CG4795	Cpn	Negative		-	Negative		-	Negative		http://flybase.org/reports/FBgn0261714.html		Calphotin (Cpn).
100694	CG8038	CG8038	Negative		-	Negative		-	Negative		http://flybase.org/reports/FBgn0035831.html	http://www.omim.org/entry/606114
100838	CG32816	CG32816	Positive		No	Positive		No	Negative		http://flybase.org/reports/FBgn0052816.html		No human ortholog.
110784	CG1449	zfh2	Negative		-	Negative		-	Negative		http://flybase.org/reports/FBgn0004607.html	http://www.omim.org/entry/606940	Zn finger homeodomain 2 (zfh2).
102954	CG42248	CG42248	Negative		-	Negative		-	Negative		http://flybase.org/reports/FBgn0264449.html		Human pleckstrin homology, MyTH4 and FERM domain containing H1 (PLEKHH1) ortholog. HGNC:17733.
102014	CG14808	Scgdelta	Negative		-	Negative		-	Negative		http://flybase.org/reports/FBgn0025391.html	http://www.omim.org/entry/601411	Sarcoglycan delta (Scgdelta).
102006	CG7187	Ssdp	Negative		-	Negative		-	Negative		http://flybase.org/reports/FBgn0011481.html	http://www.omim.org/entry/607389	Sequence-specific single-stranded DNA-binding protein (Ssdp).
100711	CG9943	Surf1	Negative		-	Negative		-	Negative		http://flybase.org/reports/FBgn0029117.html	http://www.omim.org/entry/185620	Surfeit 1 (Surf1).
100822	CG6439	CG6439	Negative		-	Negative		-	Negative		http://flybase.org/reports/FBgn0038922.html	http://www.omim.org/entry/604526
101901	CG34109	CG34109	Negative		-	Negative		-	Negative		http://flybase.org/reports/FBgn0083945.html		No human ortholog.
110304	CG10270	D19B	Negative		-	Negative		-	Negative		http://flybase.org/reports/FBgn0022699.html		D19B (D19B).
100747	CG13369	CG13369	Negative		-	Negative		-	Negative		http://flybase.org/reports/FBgn0025640.html	http://www.omim.org/entry/611132
101974	CG30067	Obp50a	Negative		-	Negative		-	Negative		http://flybase.org/reports/FBgn0050067.html		Odorant-binding protein 50a (Obp50a). No human ortholog.
102008	CG14997	CG14997	Negative		-	Negative		-	Negative		http://flybase.org/reports/FBgn0035515.html		Human sulfide quinone reductase-like (yeast) (SQRDL) ortholog. HGNC:20390.
100761	CG7375	UbcE2M	Negative		-	Negative		-	Negative		http://flybase.org/reports/FBgn0035853.html	http://www.omim.org/entry/603173	Ubiquitin conjugating enzyme E2M (UbcE2M).
100651	CG11321	LUBEL	Negative		-	Negative		-	Negative		http://flybase.org/reports/FBgn0031857.html	http://www.omim.org/entry/612487	Linear Ubiquitin E3 ligase (LUBEL).
102066	CG6738	CG6738	Negative		-	Negative		-	Negative		http://flybase.org/reports/FBgn0039053.html	http://www.omim.org/entry/104620
104282	CG10933	Dlish	Negative		-	Negative		-	Negative		http://flybase.org/reports/FBgn0034264.html		Dachs ligand with SH3s (Dlish).
100632	CG17530	GstE6	Negative		-	Negative		-	Negative		http://flybase.org/reports/FBgn0034264.html	http://www.omim.org/entry/600436	Glutathione S transferase E6 (GstE6).
100693	CG11901	EF1gamma	Negative		-	Negative		-	Negative		http://flybase.org/reports/FBgn0029176.html	http://www.omim.org/entry/130593	eukaryotic translation elongation factor 1 gamma (EF1gamma).
100752	CG7039	Arfrp1	Negative		-	Negative		-	Negative		http://flybase.org/reports/FBgn0030088.html	http://www.omim.org/entry/604699	ADP-ribosylation factor related protein 1 (Arfrp1).
100730	CG4742	mRpL22	Negative		-	Negative		-	Negative		http://flybase.org/reports/FBgn0030786.html	http://www.omim.org/entry/611835	mitochondrial ribosomal protein L22 (mRpL22).
100740	CG11958	Cnx99A	Negative		-	Negative		-	Negative		http://flybase.org/reports/FBgn0015622.html	http://www.omim.org/entry/114217	Calnexin 99A (Cnx99A).
102052	CG3401	betaTub60D	Negative		-	Negative		-	Negative		http://flybase.org/reports/FBgn0003888.html	http://www.omim.org/entry/615103	beta-Tubulin at 60D (betaTub60D).
102021	CG10930	PpY-55A	Negative		-	Negative		-	Negative		http://flybase.org/reports/FBgn0003140.html	http://www.omim.org/entry/600590	Protein phosphatase Y at 55A (PpY-55A).
100842	CG10702	CG10702	Negative		-	Negative		-	Negative		http://flybase.org/reports/FBgn0032752.html	http://www.omim.org/entry/147671
100883	CG11155	CG11155	Negative		-	Negative		-	Negative		http://flybase.org/reports/FBgn0039927.html	http://www.omim.org/entry/600283
101948	CG6096	E(spl)m5-HLH	Negative		-	Negative		-	Negative		http://flybase.org/reports/FBgn0002631.html	http://www.omim.org/entry/609970	Enhancer of split m5, helix-loop-helix (E(spl)m5-HLH).
102093	CG6893	CG6893	Negative		-	Negative		-	Negative		http://flybase.org/reports/FBgn0036807.html	http://www.omim.org/entry/606794
100835	CG13190	cutoff	Negative		-	Positive		No	Negative		http://flybase.org/reports/FBgn0260932.html	http://www.omim.org/entry/605996	cutoff (cuff).
100748	CG8357	Drep1	Negative		-	Positive		No	Negative		http://flybase.org/reports/FBgn0025592.html	http://www.omim.org/entry/604440	DNA fragmentation factor-related protein 1 (Drep1).
100863	CG13850	CG13850	Negative		-	Negative		-	Negative		http://flybase.org/reports/FBgn0038961.html	http://www.omim.org/entry/611325
101908	CG14023	Ncoa6	Negative		-	Negative		-	Negative		http://flybase.org/reports/FBgn0031698.html	http://www.omim.org/entry/605299
100686	CG5970	cbc	Negative		-	Negative		-	Negative		http://flybase.org/reports/FBgn0033842.html	http://www.omim.org/entry/608757	crowded by cid (cbc).
102101	CG3218	fs(1)K10	Negative		-	Positive		No	Negative		http://flybase.org/reports/FBgn0000810.html		female sterile (1) K10 (fs(1)K10).
100851	CG6765	CG6765	Negative		-	Negative		-	Negative		http://flybase.org/reports/FBgn0035903.html
103809	CG9244	Acon	Negative		-	Negative		-	Negative		http://flybase.org/reports/FBgn0010100.html	http://www.omim.org/entry/100850	Aconitase (Acon).
104330	CG7622	RpL36	Negative		-	Negative		-	Negative		http://flybase.org/reports/FBgn0002579.html		Ribosomal protein L36 (RpL36). Human ribosomal protein L36 (RPL36) ortholog.
103738	CG13849	Nop56	Negative		-	Negative		-	Negative		http://flybase.org/reports/FBgn0038964.html
103501	CG32856	CG32856	Negative		-	Negative		-	Negative		http://flybase.org/reports/FBgn0052856.html		No human ortholog.
103021	CG12994	CG12994	Negative		-	Negative		-	Negative		http://flybase.org/reports/FBgn0040877.html	http://www.omim.org/entry/603401	Low DIOPT score.
102040	CG10946	dpr14	Negative		-	Negative		-	Negative		http://flybase.org/reports/FBgn0029974.html		defective proboscis extension response 14 (dpr14).
100879	CG12159	CG12159	Negative		-	Negative		-	Negative		http://flybase.org/reports/FBgn0033232.html		Human family with sequence similarity 174 member A (FAM174A) ortholog.
102062	CG11455	ND-15	Negative		-	Negative		-	Negative		http://flybase.org/reports/FBgn0031228.html	http://www.omim.org/entry/603847	NADH dehydrogenase (ubiquinone) 15 kDa subunit (ND-15).
100722	CG4035	eIF-4E	Negative		-	Negative		-	Negative		http://flybase.org/reports/FBgn0015218.html	http://www.omim.org/entry/133440	Eukaryotic initiation factor 4E (eIF-4E).
101999	CG9901	Arp2	Negative		-	Negative		-	Negative		http://flybase.org/reports/FBgn0011742.html	http://www.omim.org/entry/604221	Actin-related protein 2 (Arp2).
103710	CG10228	Pcf11	Negative		-	Negative		-	Negative		http://flybase.org/reports/FBgn0264962.html	http://www.omim.org/entry/608876	Protein 1 of cleavage and polyadenylation factor 1 (Pcf11).
103764	CG1311	CG1311	Negative		-	Negative		-	Negative		http://flybase.org/reports/FBgn0035523.html	http://www.omim.org/entry/606105
104332	CG13603	CG13603	Negative		-	Negative		-	Negative		http://flybase.org/reports/FBgn0039135.html		Human transmembrane protein 179 (TMEM179) ortholog.
103008	CG7118	Jon66Ci	Negative		-	Negative		-	Negative		http://flybase.org/reports/FBgn0035886.html		Jonah 66Ci (Jon66Ci).
102016	CG1519	Prosalpha7	Negative		-	Negative		-	Negative		http://flybase.org/reports/FBgn0023175.html	http://www.omim.org/entry/176843	Proteasome alpha7 subunit (Prosalpha7).
102038	CG9728	PH4alphaNE1	Negative		-	Negative		-	Negative		http://flybase.org/reports/FBgn0039780.html	http://www.omim.org/entry/176710	prolyl-4-hydroxylase-alpha NE1 (PH4alphaNE1).
103528	CG14959	ckd	Negative		-	Negative		-	Negative		http://flybase.org/reports/FBgn0035427.html		cracked (ckd). No human ortholog.
104254	CG7526	frac	Negative		-	Negative		-	Negative		http://flybase.org/reports/FBgn0035798.html	http://www.omim.org/entry/120577	faulty attraction (frac).
101990	CG12000	Prosbeta7	Negative		-	Negative		-	Positive		http://flybase.org/reports/FBgn0250746.html	http://www.omim.org/entry/602177	Proteasome beta7 subunit (Prosbeta7).
102010	CG13628	Rpb10	Negative		-	Negative		-	Negative		http://flybase.org/reports/FBgn0039218.html	http://www.omim.org/entry/601189	Rpb10 (Rpb10).
103734	CG11132	DMAP1	Negative		-	Negative		-	Negative		http://flybase.org/reports/FBgn0034537.html	http://www.omim.org/entry/605077	DNA methyltransferase 1 associated protein 1 (DMAP1).
105887	CG8211	IntS2	Negative		-	Negative		-	Negative		http://flybase.org/reports/FBgn0030858.html	http://www.omim.org/entry/611346	Integrator 2 (IntS2).
102056	CG13862	CG13862	Negative		-	Negative		-	Negative		http://flybase.org/reports/FBgn0038942.html
100474	CG12869	CG12869	Negative		-	Negative		-	Negative		http://flybase.org/reports/FBgn0033943.html	http://www.omim.org/entry/600568
103700	CG4598	CG4598	Negative		-	Negative		-	Negative		http://flybase.org/reports/FBgn0032160.html	http://www.omim.org/entry/600305
101971	CG9147	CG9147	Negative		-	Negative		-	Negative		http://flybase.org/reports/FBgn0031774.html		Human chromosome 5 open reading frame 63 (C5orf63) ortholog.
100878	CG6763	CG6763	Negative		-	Negative		-	Negative		http://flybase.org/reports/FBgn0039069.html	http://www.omim.org/entry/608860
103728	CG6937	CG6937	Negative		-	Negative		-	Negative		http://flybase.org/reports/FBgn0038989.html	http://www.omim.org/entry/611970
103782	CG8849	mRpL24	Negative		-	Negative		-	Negative		http://flybase.org/reports/FBgn0031651.html	http://www.omim.org/entry/611836	mitochondrial ribosomal protein L24 (mRpL24).
101010	CG31510	CG31510	Negative		-	Positive	http://www.iiserpune.ac.in/rnai/uploads/research/971/images/de70e_CG31510-(KK101010-Yki).png	No	Negative		http://flybase.org/reports/FBgn0051510.html		No human ortholog.
105610	CG1227	CG1227	Negative		-	Negative		-	Negative		http://flybase.org/reports/FBgn0037491.html	http://www.omim.org/entry/604719
104092	CG31020	spdo	Negative		-	Negative		-	Negative		http://flybase.org/reports/FBgn0260440.html		sanpodo (spdo).
110662	CG2995	G9a	Negative		-	Positive	http://www.iiserpune.ac.in/rnai/uploads/research/975/images/ac0ac_G9a-(KK110662-Yki).png	No	Negative		http://flybase.org/reports/FBgn0040372.html	http://www.omim.org/entry/604599	G9a (G9a). Human euchromatic histone lysine methyltransferase 2 (EHMT2). HGNC:14129.
106824	CG10579	Eip63E	Negative		-	Negative		-	Negative		http://flybase.org/reports/FBgn0005640.html	http://www.omim.org/entry/610679	Ecdysone-induced protein 63E (Eip63E).
106290	CG8479	Opa1	Negative		-	Negative		-	Negative		http://flybase.org/reports/FBgn0261276.html	http://www.omim.org/entry/605290	Optic atrophy 1 (Opa1).
107406	CG15247	CG15247	Negative		-	Negative		-	Negative		http://flybase.org/reports/FBgn0030156.html
110278	CG2087	PEK	Negative		-	Negative		-	Negative		http://flybase.org/reports/FBgn0037327.html	http://www.omim.org/entry/604032	pancreatic eIF-2 alpha kinase (PEK).
102303	CG6936	mth	Negative		-	Negative		-	Negative		http://flybase.org/reports/FBgn0023000.html		Methuselah (mth). Human adhesion G protein-coupled receptor F5 (ADGRF5) ortholog. HGNC:19030.
102015	CG9067	CG9067	Negative		-	Negative		-	Negative		http://flybase.org/reports/FBgn0033605.html	http://www.omim.org/entry/610970
107970	CG4843	Tm2	Negative		-	Negative		-	Negative		http://flybase.org/reports/FBgn0004117.html	http://www.omim.org/entry/191030	Tropomyosin 2 (Tm2).
106433	CG33261	Trl	Negative		-	Positive		No	Negative		http://flybase.org/reports/FBgn0013263.html		Trithorax-like (Trl).
101287	CG2750	CG2750	Negative		-	Negative		-	Negative		http://flybase.org/reports/FBgn0030376.html
101525	CG18361	dsh	Negative		-	Negative		-	Negative		http://flybase.org/reports/FBgn0000499.html	http://www.omim.org/entry/602151	dishevelled (dsh).
105638	CG11183	Dcp1	Negative		-	Negative		-	Negative		http://flybase.org/reports/FBgn0034921.html	http://www.omim.org/entry/609843	Decapping protein 1 (Dcp1).
107434	CG4313	CG4313	Negative		-	Negative		-	Negative		http://flybase.org/reports/FBgn0025632.html	http://www.omim.org/entry/606383
104691	CG3839	l(1)sc	Negative		-	Negative		-	Negative		http://flybase.org/reports/FBgn0002561.html	http://www.omim.org/entry/100790	lethal of scute (l(1)sc).
106120	CG4233	Got2	Negative		-	Negative		-	Negative		http://flybase.org/reports/FBgn0001125.html	http://www.omim.org/entry/138150	Glutamate oxaloacetate transaminase 2 (Got2).
100753	CG34399	Nox	Negative		-	Negative		-	Negative		http://flybase.org/reports/FBgn0085428.html	http://www.omim.org/entry/606572	NADPH oxidase (Nox).
103410	CG8789	wnd	Negative		-	Negative		-	Negative		http://flybase.org/reports/FBgn0036896.html	http://www.omim.org/entry/604915	wallenda (wnd).
105333	CG8859	Cyp6g2	Negative		-	Negative		-	Negative		http://flybase.org/reports/FBgn0033696.html	http://www.omim.org/entry/274180	Cyp6g2 (Cyp6g2).
104496	CG17870	14-3-3zeta	Negative		-	Negative		-	Negative		http://flybase.org/reports/FBgn0004907.html	http://www.omim.org/entry/601288	14-3-3zeta (14-3-3zeta).
106845	CG15224	CkIIbeta	Negative		-	Negative		-	Negative		http://flybase.org/reports/FBgn0000259.html	http://www.omim.org/entry/115441	Casein kinase II beta subunit (CkIIbeta).
103579	CG8536	beta4GalNAcTA	Negative		-	Negative		-	Negative		http://flybase.org/reports/FBgn0027538.html	http://www.omim.org/entry/604013	beta4GalNAcTA (beta4GalNAcTA).
103969	CG17928	CG17928	Negative		-	Negative		-	Negative		http://flybase.org/reports/FBgn0032603.html	http://www.omim.org/entry/606148
104116	CG17137	Porin2	Negative		-	Negative		-	Negative		http://flybase.org/reports/FBgn0069354.html	http://www.omim.org/entry/610029	Porin2 (Porin2).
105732	CG34412	Tlk	Negative		-	Negative		-	Negative		http://flybase.org/reports/FBgn0086899.html	http://www.omim.org/entry/608439	Tousled-like kinase (Tlk).
100068	CG13495	Gr58b	Negative		-	Negative		-	Negative		http://flybase.org/reports/FBgn0041238.html		Gustatory receptor 58b (Gr58b). No human ortholog.
100101	CG9437	hng1	Negative		-			-	Negative		http://flybase.org/reports/FBgn0034599.html		hinge1 (hng1). No human ortholog.
100057	CG11767	Or24a	Negative		-	Negative		-	Negative		http://flybase.org/reports/FBgn0026394.html		Odorant receptor 24a (Or24a). No human ortholog.
100038	CG5958	CG5958	Negative		-	Negative		-	Negative		http://flybase.org/reports/FBgn0031913.html		Human alpha tocopherol transfer protein like (TTPAL) ortholog. HGNC:16114.
100047	CG14685	Cap-H2	Negative		-	Negative		-	Negative		http://flybase.org/reports/FBgn0037831.html	http://www.omim.org/entry/611230	Chromosome associated protein H2 (Cap-H2).
100086	CG31862	CG31862	Negative		-	Negative		-	Negative		http://flybase.org/reports/FBgn0051862.html		No human ortholog.
100058	CG32553	CG32553	Negative		-	Negative		-	Negative		http://flybase.org/reports/FBgn0052553.html		No human ortholog.
100102	CG8947	26-29-p	Negative		-	Negative		-	Negative		http://flybase.org/reports/FBgn0250848.html		26-29kD-proteinase (26-29-p).
100091	CG11619	CG11619	Negative		-	Negative		-	Negative		http://flybase.org/reports/FBgn0036836.html	http://www.omim.org/entry/614124
100003	CG31991	mdy	Negative		-	Negative		-	Negative		http://flybase.org/reports/FBgn0004797.html	http://www.omim.org/entry/604900	midway (mdy).
100046	CG31121	CG31121	Negative		-	Negative		-	Negative		http://flybase.org/reports/FBgn0051121.html	http://www.omim.org/entry/605460
100621	CG2968	CG2968	Negative		-	Negative		-	Negative		http://flybase.org/reports/FBgn0028342.html	http://www.omim.org/entry/603150	ATP synthase, delta subunit (TPsyndelta).
100100	CG17028	CG17028	Negative		-	Negative		-	Negative		http://flybase.org/reports/FBgn0036552.html	http://www.omim.org/entry/602064
100008	CG6724	CG6724	Negative		-	Negative		-	Negative		http://flybase.org/reports/FBgn0032298.html	http://www.omim.org/entry/616620
100033	CG10232	CG10232	Negative		-	Negative		-	Negative		http://flybase.org/reports/FBgn0039108.html		No human ortholog.
100041	CG13155	CG13155	Negative		-	Negative		-	Negative		http://flybase.org/reports/FBgn0033723.html		No human ortholog.
100104	CG6193	Apc2	Negative		-	Negative		-	Negative		http://flybase.org/reports/FBgn0026598.html	http://www.omim.org/entry/612034	Adenomatous polyposis coli 2 (Apc2).
100039	CG17348	drl	Negative		-	Negative		-	Negative		http://flybase.org/reports/FBgn0015380.html	http://www.omim.org/entry/600524	derailed (drl).
106873	CG8527	ppk23	Negative		-	Negative		-	Negative		http://flybase.org/reports/FBgn0030844.html		pickpocket 23 (ppk23).
100080	CG4168	CG4168	Negative		-	Negative		-	Negative		http://flybase.org/reports/FBgn0028888.html
100056	CG8328	E(spl)mdelta-HLH	Negative		-	Negative		-	Negative		http://flybase.org/reports/FBgn0002734.html	http://www.omim.org/entry/610331	Enhancer of split mdelta, helix-loop-helix (E(spl)mdelta-HLH).
100099	CG5440	CG5440	Negative		-	Negative		-	Negative		http://flybase.org/reports/FBgn0031331.html	http://www.omim.org/entry/604151
109256	CG30489	Cyp12d1-p	Negative		-	Negative		-	Negative		http://flybase.org/reports/FBgn0050489.html	http://www.omim.org/entry/606530	Cyp12d1-p (Cyp12d1-p).
102348	CG3315	TrxT	Negative		-	Negative		-	Negative		http://flybase.org/reports/FBgn0029752.html	http://www.omim.org/entry/187700	Thioredoxin T (TrxT).
101020	CG11828	CG11828	Negative		-	Negative		-	Negative		http://flybase.org/reports/FBgn0039616.html	http://www.omim.org/entry/176710
104905	CG30360	Mal-A6	Negative		-	Negative		-	Negative		http://flybase.org/reports/FBgn0050360.html	http://www.omim.org/entry/104614	Maltase A6 (Mal-A6).
110214	CG1973	yata	Negative		-	Negative		-	Negative		http://flybase.org/reports/FBgn0260990.html	http://www.omim.org/entry/607982	yata (yata).
109295	CG11033	Kdm2	Negative		-	Negative		-	Negative		http://flybase.org/reports/FBgn0037659.html	http://www.omim.org/entry/605657	Lysine (K)-specific demethylase 2 (Kdm2).
102366	CG3719	CG3719	Negative		-	Negative		-	Negative		http://flybase.org/reports/FBgn0024986.html	http://www.omim.org/entry/609063
101201	CG18231	CG18231	Negative		-	Negative		-	Negative		http://flybase.org/reports/FBgn0036796.html	http://www.omim.org/entry/176710
102146	CG12299	CG12299	Negative		-	Negative		-	Negative		http://flybase.org/reports/FBgn0032295.html
101116	CG7069	CG7069	Negative		-	Negative		-	Negative		http://flybase.org/reports/FBgn0038952.html	http://www.omim.org/entry/179050
100982	CG10093	Cyp313a3	Negative		-	Negative		-	Negative		http://flybase.org/reports/FBgn0038007.html	http://www.omim.org/entry/604087	Cyp313a3 (Cyp313a3).
100061	CG32644	Mur11Da	Negative		-	Negative		-	Negative		http://flybase.org/reports/FBgn0052644.html		Mucin related 11Da (Mur11Da). No human ortholog.
110454	CG1333	Ero1L	Negative		-	Negative		-	Negative		http://flybase.org/reports/FBgn0261274.html	http://www.omim.org/entry/615437	Endoplasmic reticulum oxidoreductin-1-like (Ero1L).
101097	CG12229	CG12229	Negative		-	Negative		-	Negative		http://flybase.org/reports/FBgn0036723.html	http://www.omim.org/entry/179050
100054	CG16710	CG16710	Negative		-	Negative		-	Negative		http://flybase.org/reports/FBgn0039101.html
100977	CG5154	Idgf5	Negative		-	Negative		-	Negative		http://flybase.org/reports/FBgn0064237.html	http://www.omim.org/entry/600031	imaginal disc growth factor 5 (Idgf5).
100064	CG9064	Ucp4C	Negative		-	Negative		-	Negative		http://flybase.org/reports/FBgn0031757.html	http://www.omim.org/entry/613725	Ucp4C (Ucp4C).
109640	CG5444	Taf4	Negative		-	Negative		-	Negative		http://flybase.org/reports/FBgn0010280.html	http://www.omim.org/entry/601689	TBP-associated factor 4 (Taf4).
100007	CG10137	CG10137	Negative		-	Negative		-	Negative		http://flybase.org/reports/FBgn0032800.html	http://www.omim.org/entry/616690
110348	CG31368	CG31368	Negative		-	Negative		-	Negative		http://flybase.org/reports/FBgn0051368.html	http://www.omim.org/entry/610548
110317	CG3086	MAPk-Ak2	Negative		-	Positive		No	Negative		http://flybase.org/reports/FBgn0013987.html	http://www.omim.org/entry/602130	MAP kinase activated protein-kinase-2 (MAPk-Ak2).
102340	CG2889	CG2889	Negative		-	Negative		-	Negative		http://flybase.org/reports/FBgn0030206.html
104881	CG8567	Deaf1	Negative		-	Negative		-	Negative		http://flybase.org/reports/FBgn0013799.html	http://www.omim.org/entry/602635	Deformed epidermal autoregulatory factor-1 (Deaf1).
101120	CG17110	CG17110	Negative		-	Negative		-	Negative		http://flybase.org/reports/FBgn0039050.html	http://www.omim.org/entry/104620
103029	CG15738	sicily	Negative		-	Negative		-	Negative		http://flybase.org/reports/FBgn0030352.html	http://www.omim.org/entry/612392	severe impairment of CI with lengthened youth (sicily).
105284	CG1320	mRpL23	Negative		-	Negative		-	Negative		http://flybase.org/reports/FBgn0035335.html	http://www.omim.org/entry/600789	mitochondrial ribosomal protein L23 (mRpL23).
109655	CG4170	vig	Negative		-	Negative		-	Negative		http://flybase.org/reports/FBgn0024183.html	http://www.omim.org/entry/607378	vasa intronic gene (vig).
103665	CG5393	apt	Negative		-	Negative		-	Negative		http://flybase.org/reports/FBgn0015903.html		apontic (apt).
110444	CG2543	CG2543	Negative		-	Negative		-	Negative		http://flybase.org/reports/FBgn0030407.html	http://www.omim.org/entry/136510
104716	CG3019	su(w[a])	Negative		-	Negative		-	Negative		http://flybase.org/reports/FBgn0003638.html	http://www.omim.org/entry/601945	suppressor of white-apricot (su(w[a]).
110692	CG6428	CG6428	Negative		-	Negative		-	Negative		http://flybase.org/reports/FBgn0029689.html		Human asparaginase (ASPG) ortholog. HGNC:20123.
100205	CG31269	CG31269	Negative		-	Negative		-	Negative		http://flybase.org/reports/FBgn0051269.html
100182	CG2120	CG2120	Negative		-	Negative		-	Negative		http://flybase.org/reports/FBgn0030005.html	http://www.omim.org/entry/601069
101096	CG14030	Bub1	Negative		-	Negative		-	Negative		http://flybase.org/reports/FBgn0031696.html	http://www.omim.org/entry/602452	Bub1 kinase (Bub1).
102843	CG4706	CG4706	Negative		-	Negative		-	Negative		http://flybase.org/reports/FBgn0037862.html	http://www.omim.org/entry/100850
101212	CG31414	Gba1b	Negative		-	Negative		-	Negative		http://flybase.org/reports/FBgn0051414.html	http://www.omim.org/entry/606463	Glucocerebrosidase 1b (Gba1b). Alias CG10299 and CG31414.
104569	CG5680	bsk	Negative		-	Negative		-	Negative		http://flybase.org/reports/FBgn0000229.html	http://www.omim.org/entry/601158	basket (bsk).
101734	CG4264	Hsc70-4	Negative		-	Negative		-	Negative		http://flybase.org/reports/FBgn0266599.html	http://www.omim.org/entry/600816	Heat shock protein cognate 4 (Hsc70-4).
100999	CG4839	CG4839	Negative		-	Negative		-	Negative		http://flybase.org/reports/FBgn0032187.html	http://www.omim.org/entry/176894
106329	CG4488	Wee1	Negative		-	Negative		-	Negative		http://flybase.org/reports/FBgn0011737.html	http://www.omim.org/entry/193525	Wee1 kinase (Wee1).
104180	CG6816	Cyp18a1	Negative		-	Negative		-	Negative		http://flybase.org/reports/FBgn0010383.html	http://www.omim.org/entry/610670	Cytochrome P450-18a1 (Cyp18a1).
104187	CG31159	mRRF2	Negative		-	Negative		-	Negative		http://flybase.org/reports/FBgn0051159.html	http://www.omim.org/entry/606544	mitochondrial ribosome recycling factor 2 (mRRF2).
110342	CG10895	lok	Negative		-	Negative		-	Negative		http://flybase.org/reports/FBgn0019686.html	http://www.omim.org/entry/604373	loki (lok).
102249	CG2054	Cht2	Negative		-	Negative		-	Negative		http://flybase.org/reports/FBgn0022702.html	http://www.omim.org/entry/606080	Chitinase 2 (Cht2).
103828	CG3008	CG3008	Negative		-	Negative		-	Negative		http://flybase.org/reports/FBgn0031643.html	http://www.omim.org/entry/603579	Human RIO kinase 3 (RIOK3) ortholog. HGNC:11451.
101283	CG9726	PH4alphaMP	Negative		-	Negative		-	Negative		http://flybase.org/reports/FBgn0026190.html	http://www.omim.org/entry/176710	prolyl-4-hydroxylase-alpha MP (PH4alphaMP).
101173	CG13098	mRpL51	Negative		-	Negative		-	Negative		http://flybase.org/reports/FBgn0032053.html	http://www.omim.org/entry/611855	mitochondrial ribosomal protein L51 (mRpL51).
102834	CG2712	CG2712	Negative		-	Negative		-	Negative		http://flybase.org/reports/FBgn0024975.html
100347	CG17173	CG17173	Negative		-	Negative		-	Negative		http://flybase.org/reports/FBgn0036447.html	http://www.omim.org/entry/604561
110086	CG1980	dj	Negative		-	Negative		-	Negative		http://flybase.org/reports/FBgn0019828.html		don juan (dj). No human ortholog.
104171	CG8453	Cyp6g1	Negative		-	Negative		-	Negative		http://flybase.org/reports/FBgn0025454.html	http://www.omim.org/entry/274180	Cyp6g1 (Cyp6g1).
104688	CG8967	otk	Negative		-	Negative		-	Negative		http://flybase.org/reports/FBgn0004839.html	http://www.omim.org/entry/601890	off-track (otk).
102914	CG10638	CG10638	Negative		-	Positive		No	Negative		http://flybase.org/reports/FBgn0036290.html	http://www.omim.org/entry/604707
100322	CG16940	Dis3l2	Negative		-	Negative		-	Negative		http://flybase.org/reports/FBgn0035111.html	http://www.omim.org/entry/614184	Dis3 like 3'-5' exoribonuclease 2 (Dis3l2).
104218	CG7362	CG7362	Negative		-	Negative		-	Negative		http://flybase.org/reports/FBgn0038258.html	http://www.omim.org/entry/179050
101702	CG9961	CG9961	Negative		-	Negative		-	Negative		http://flybase.org/reports/FBgn0031451.html	http://www.omim.org/entry/172270
107471	CG8246	Poxn	Negative		-	Negative		-	Negative		http://flybase.org/reports/FBgn0003130.html	http://www.omim.org/entry/167411	Pox neuro (Poxn).
104663	CG7616	CG7616	Negative		-	Negative		-	Negative		http://flybase.org/reports/FBgn0036142.html		Human aarF domain containing kinase 5 (ADCK5) ortholog. HGNC:21738.
103543	CG31478	mRpL9	Negative		-	Negative		-	Negative		http://flybase.org/reports/FBgn0038319.html	http://www.omim.org/entry/611824	mitochondrial ribosomal protein L9 (mRpL9).
103580	CG7097	hppy	Negative		-	Negative		-	Negative		http://flybase.org/reports/FBgn0263395.html	http://www.omim.org/entry/604921	happyhour (hppy).
110592	CG17829	CG17829	Negative		-	Negative		-	Negative		http://flybase.org/reports/FBgn0025635.html	http://www.omim.org/entry/607099
103590	CG6913	Fer3	Negative		-	Negative		-	Negative		http://flybase.org/reports/FBgn0037937.html		Fer for 48 related 3 (Fer3). Human Fer3 like bHLH transcription factor (FERD3L) ortholog.
104867	CG5064	Srp68	Negative		-	Negative		-	Negative		http://flybase.org/reports/FBgn0035947.html	http://www.omim.org/entry/604858	Signal recognition particle protein 68 (Srp68).
102712	CG13993	Pfdn1	Negative		-	Negative		-	Negative		http://flybase.org/reports/FBgn0031776.html	http://www.omim.org/entry/604897	Prefoldin 1 (Pfdn1).
104880	CG8863	Droj2	Negative		-	Negative		-	Negative		http://flybase.org/reports/FBgn0038145.html		DnaJ-like-2 (Droj2). Human DnaJ heat shock protein family (Hsp40) member A4 (DNAJA4) ortholog. HGNC:14885.
101751	CG7758	ppl	Negative		-	Negative		-	Negative		http://flybase.org/reports/FBgn0027945.html	http://www.omim.org/entry/238330	pumpless (ppl).
105000	CG4360	CG4360	Negative		-	Negative		-	Negative		http://flybase.org/reports/FBgn0038787.html
103830	CG9088	lid	Negative		-	Negative		-	Negative		http://flybase.org/reports/FBgn0031759.html	http://www.omim.org/entry/180202	little imaginal disks (lid).
106817	CG8517	CG8517	Negative		-	Negative		-	Negative		http://flybase.org/reports/FBgn0034472.html	http://www.omim.org/entry/609063
100972	CG12236	CG12236	Negative		-	Negative		-	Negative		http://flybase.org/reports/FBgn0029822.html
104152	CG4323	Dic2	Negative		-	Negative		-	Negative		http://flybase.org/reports/FBgn0038797.html	http://www.omim.org/entry/606794	Dicarboxylate carrier 2 (Dic2).
101764	CG10036	otp	Negative		-	Negative		-	Negative		http://flybase.org/reports/FBgn0015524.html	http://www.omim.org/entry/604529	orthopedia (otp).
102126	CG12287	pdm2	Negative		-	Negative		-	Negative		http://flybase.org/reports/FBgn0004394.html	http://www.omim.org/entry/607394	POU domain protein 2 (pdm2).
103602	CG10639	CG10639	Negative		-	Negative		-	Negative		http://flybase.org/reports/FBgn0032729.html	http://www.omim.org/entry/609584
102176	CG15845	Adf1	Negative		-	Negative		-	Negative		http://flybase.org/reports/FBgn0284249.html		Adh transcription factor 1 (Adf1). No human ortholog.
103837	CG10197	kn	Negative		-	Negative		-	Negative		http://flybase.org/reports/FBgn0001319.html	http://www.omim.org/entry/607407	knot (kn).
101085	CG12630	tio	Negative		-	Negative		-	Negative		http://flybase.org/reports/FBgn0028979.html	http://www.omim.org/entry/614427	tiptop (tio).
101256	CG4936	CG4936	Negative		-	Negative		-	Negative		http://flybase.org/reports/FBgn0038768.html		Human zinc finger protein 558 (ZNF558) ortholog. HGNC:26422.
106591	CG5008	GNBP3	Negative		-	Negative		-	Negative		http://flybase.org/reports/FBgn0040321.html		Gram-negative binding protein 3 (GNBP3). No human ortholog.
101149	CG2254	CG2254	Negative		-	Negative		-	Negative		http://flybase.org/reports/FBgn0029994.html	http://www.omim.org/entry/612831
100985	CG8878	CG8878	Negative		-	Negative		-	Negative		http://flybase.org/reports/FBgn0027504.html		Human vaccinia related kinase 3 (VRK3) ortholog. HGNC:18996.
100124	CG7400	Fatp	Negative		-	Negative		-	Negative		http://flybase.org/reports/FBgn0267828.html	http://www.omim.org/entry/604194	Fatty acid (long chain) transport protein (Fatp).
104735	CG2397	Cyp6a13	Negative		-	Positive		No	Negative		http://flybase.org/reports/FBgn0033304.html	http://www.omim.org/entry/274180	Cyp6a13 (Cyp6a13).
109463	CG3616	Cyp9c1	Negative		-	Negative		-	Negative		http://flybase.org/reports/FBgn0015040.html	http://www.omim.org/entry/274180	Cytochrome P450-9c1 (Cyp9c1).
108487	CG13897	hng3	Negative		-	Negative		-	Negative		http://flybase.org/reports/FBgn0035160.html		hinge3 (hng3). No human ortholog.
108055	CG1621	Coop	Negative		-	Negative		-	Negative		http://flybase.org/reports/FBgn0263240.html		Corepressor of Pangolin (Coop). No human ortholog.
109335	CG9131	slmo	Negative		-	Negative		-	Negative		http://flybase.org/reports/FBgn0029161.html		slowmo (slmo). Human PRELI domain containing 3B (PRELID3B) ortholog. HGNC:15892.
101594	CG18233	CG18233	Negative		-	Negative		-	Negative		http://flybase.org/reports/FBgn0036795.html	http://www.omim.org/entry/176710
103308	CG17834	CG17834	Negative		-	Negative		-	Negative		http://flybase.org/reports/FBgn0028394.html		No human ortholog.
101551	CG7998	Mdh2	Negative		-	Negative		-	Negative		http://flybase.org/reports/FBgn0262559.html	http://www.omim.org/entry/154100	Malate dehydrogenase 2 (Mdh2).
101449	CG1417	slgA	Negative		-	Negative		-	Negative		http://flybase.org/reports/FBgn0003423.html	http://www.omim.org/entry/606810	sluggish A (slgA).
100067	CG7354	mRpS26	Negative		-	Negative		-	Negative		http://flybase.org/reports/FBgn0036774.html	http://www.omim.org/entry/611988	mitochondrial ribosomal protein S26 (mRpS26).
110516	CG3668	fd59A	Negative		-	Negative		-	Negative		http://flybase.org/reports/FBgn0004896.html	http://www.omim.org/entry/611539	forkhead domain 59A (fd59A).
101466	CG13827	CG13827	Negative		-	Negative		-	Negative		http://flybase.org/reports/FBgn0039068.html	http://www.omim.org/entry/607583
101709	CG33150	Gr59f	Negative		-	Negative		-	Negative		http://flybase.org/reports/FBgn0041234.html		Gustatory receptor 59f (Gr59f).
110190	CG10160	ImpL3	Negative		-	Negative		-	Negative		http://flybase.org/reports/FBgn0001258.html	http://www.omim.org/entry/150000	Ecdysone-inducible gene L3 (ImpL3).
105897	CG16957	CG16957	Negative		-	Negative		-	Negative		http://flybase.org/reports/FBgn0032519.html	http://www.omim.org/entry/300435
100676	CG14740	CG14740	Negative		-	Negative		-	Negative		http://flybase.org/reports/FBgn0037988.html	http://www.omim.org/entry/118950
101753	CG5029	SamDC	Negative		-	Negative		-	Negative		http://flybase.org/reports/FBgn0019932.html	http://www.omim.org/entry/180980	S-adenosylmethionine decarboxylase (SamDC).
108849	CG8545	CG8545	Negative		-	Negative		-	Negative		http://flybase.org/reports/FBgn0033741.html	http://www.omim.org/entry/164031
102068	CG17724	CG17724	Negative		-	Negative		-	Negative		http://flybase.org/reports/FBgn0033802.html		No human ortholog.
110312	CG18599	CG18599	Negative		-	Negative		-	Negative		http://flybase.org/reports/FBgn0038592.html		Human notochord homeobox (NOTO) ortholog.
105924	CG4193	dhd	Negative		-	Negative		-	Negative		http://flybase.org/reports/FBgn0011761.html	http://www.omim.org/entry/187700	deadhead (dhd).
105948	CG40486	CG40486	Negative		-	Negative		-	Negative		http://flybase.org/reports/FBgn0263830.html	http://www.omim.org/entry/616159
100133	CG32182	CG32182	Negative		-	Negative		-	Negative		http://flybase.org/reports/FBgn0052182.html		No human ortholog.
106573	CG42247	DCX-EMAP	Negative		-	Negative		-	Negative		http://flybase.org/reports/FBgn0259099.html		Doublecortin-domain-containing echinoderm-microtubule-associated protein (DCX-EMAP). Human echinoderm microtubule associated protein like 2 (EML2) ortholog. HGNC:18035.
100111	CG32235	CG32235	Negative		-	Positive		No	Negative		http://flybase.org/reports/FBgn0047330.html		No human ortholog.
106256	cg9126	Stromal interaction molecule	Negative		-	Negative		-	Negative		http://flybase.org/reports/FBgn0045073.html
103494	CG18314	DopEcR	Negative		-	Negative		-	Negative		http://flybase.org/reports/FBgn0035538.html	http://www.omim.org/entry/604106	Dopamine/Ecdysteroid receptor (DopEcR).
101118	cg15556	-	Negative		-	Negative		-	Negative		http://flybase.org/reports/FBgn0039821.html
108753	CG33639	CG33639	Negative		-	Negative		-	Negative		http://flybase.org/reports/FBgn0053639.html
104351	CG3642	Clp	Negative		-	Negative		-	Negative		http://flybase.org/reports/FBgn0015621.html	http://www.omim.org/entry/603052	Clipper (Clp).
110159	CG7004	fwd	Negative		-	Negative		-	Negative		http://flybase.org/reports/FBgn0004373.html	http://www.omim.org/entry/602758	four wheel drive (fwd).
103822	CG8784	PK2-R1	Negative		-	Negative		-	Negative		http://flybase.org/reports/FBgn0038140.html	http://www.omim.org/entry/605108	Pyrokinin 2 receptor 1 (PK2-R1).
107729	CG32232	CG32232	Negative		-	Negative		-	Negative		http://flybase.org/reports/FBgn0052232.html	http://flybase.org/reports/FBgn0052232.html
110606	CG3985	Syn	Negative		-	Negative		-	Negative		http://flybase.org/reports/FBgn0004575.html	http://www.omim.org/entry/602705	Synapsin (Syn).
101704	CG1842	Dhc98D	Negative		-	Negative		-	Negative		http://flybase.org/reports/FBgn0013813.html	http://www.omim.org/entry/605884	Dynein heavy chain at 89D (Dhc98D).
108475	CG42279	Nedd4	Negative		-	Negative		-	Negative		http://flybase.org/reports/FBgn0259174.html	http://www.omim.org/entry/606384	Nedd4 (Nedd4).
100130	CG6190	Ube3a	Negative		-	Negative		-	Negative		http://flybase.org/reports/FBgn0061469.html	http://www.omim.org/entry/601623	Ubiquitin protein ligase E3A (Ube3a).
103634	CG4303	Bap60	Negative		-	Negative		-	Negative		http://flybase.org/reports/FBgn0025463.html	http://www.omim.org/entry/601735	Brahma associated protein 60kD (Bap60).
107090	CG6515	TkR86C	Negative		-	Negative		-	Negative		http://flybase.org/reports/FBgn0004841.html	http://www.omim.org/entry/162321	Tachykinin-like receptor at 86C (TkR86C).
102830	cg1594	hopscotch	Negative		-	Negative		-	Negative		http://flybase.org/reports/FBgn0004864.html
105155	CG10626	Lkr	Negative		-	Negative		-	Negative		http://flybase.org/reports/FBgn0035610.html	http://www.omim.org/entry/162332	Leucokinin receptor (Lkr).
102740	CG32447	CG32447	Negative		-	Negative		-	Negative		http://flybase.org/reports/FBgn0052447.html
110484	CG42399	CG42399	Negative		-	Negative		-	Negative		http://flybase.org/reports/FBgn0259818.html		Human family with sequence similarity 179 member B (FAM179B) ortholog. HGNC:19959.
100829	CG17061	mthl10	Negative		-	Negative		-	Negative		http://flybase.org/reports/FBgn0035132.html		methuselah-like 10 (mthl10).
104536	CG4145	Col4a1	Negative		-	Negative		-	Negative		http://flybase.org/reports/FBgn0000299.html	http://www.omim.org/entry/303631	Collagen type IV alpha 1 (Col4a1).
106513	CG6006	CG6006	Negative		-	Negative		-	Negative		http://flybase.org/reports/FBgn0063649.html		No human ortholog.
104072	CG33528	Vmat	Negative		-	Negative		-	Negative		http://flybase.org/reports/FBgn0260964.html	http://www.omim.org/entry/193001	Vesicular monoamine transporter (Vmat).
108889	CG30161	CG30161	Negative		-	Negative		-	Negative		http://flybase.org/reports/FBgn0050161.html
104352	CG10846	DCTN5-p25	Negative		-	Negative		-	Negative		http://flybase.org/reports/FBgn0040228.html	http://www.omim.org/entry/612962	Dynactin 5, p25 subunit (DCTN5-p25).
101996	CG5911	ETHR	Negative		-	Negative		-	Negative		http://flybase.org/reports/FBgn0038874.html	http://www.omim.org/entry/188545
108915	CG34411	Lgr4	Negative		-	Negative		-	Negative		http://flybase.org/reports/FBgn0085440.html	http://www.omim.org/entry/606654	Leucine-rich repeat-containing G protein-coupled receptor 4 (Lgr4).
100749	CG8639	Cirl	Negative		-	Negative		-	Negative		http://flybase.org/reports/FBgn0033313.html	http://www.omim.org/entry/616416	Calcium-independent receptor for alpha-latrotoxin (Cirl). Pos for Yki, no RT.
104505	CG18405	Sema-1a	Negative		-	Negative		-	Negative		http://flybase.org/reports/FBgn0011259.html	http://www.omim.org/entry/605885	Sema-1a (Sema-1a).
108140	CG4370	Irk2	Negative		-	Negative		-	Negative		http://flybase.org/reports/FBgn0039081.html	https://www.omim.org/entry/602323	Inwardly rectifying potassium channel 2 (Irk2). Human potassium voltage-gated channel subfamily J member 12 (KCNJ12) ortholog. HGNC:6258.
101793	CG13332	CG13332	Negative		-	Negative		-	Negative		http://flybase.org/reports/FBgn0033851.html		No human ortholog.
100118	CG14962	Asciz	Negative		-	Negative		-	Negative		http://flybase.org/reports/FBgn0035407.html	http://www.omim.org/entry/614693	ASCIZ zinc finger protein (Asciz).
101336	CG6647	porin	Negative		-	Positive		No	Negative		http://flybase.org/reports/FBgn0004363.html	http://www.omim.org/entry/193245	porin (porin ).
102356	CG42796	5-HT2B	Negative		-	Negative		-	Negative		http://flybase.org/reports/FBgn0261929.html	http://www.omim.org/entry/601122	5-hydroxytryptamine (serotonin) receptor 2B (5-HT2B).
108648	cg10001	Allatostatin A receptor 2	Negative		-			-	Negative		http://flybase.org/reports/FBgn0039595.html		not set up with Yki
106523	CG7325	Eig71Ek	Negative		-	Negative		-	Negative		http://flybase.org/reports/FBgn0014851.html		Eig71Ek (Eig71Ek). No human ortholog.
100433	cg13229	-	Negative		-			-	Negative		http://flybase.org/reports/FBgn0033579.html		not set up with Yki
103736	CG11144	mGluR	Negative		-	Negative		-	Negative		http://flybase.org/reports/FBgn0019985.html	http://www.omim.org/entry/601115	metabotropic Glutamate Receptor (mGluR).
108003	CG8768	CG8768	Negative		-	Negative		-	Negative		http://flybase.org/reports/FBgn0033769.html	http://www.omim.org/entry/616162
106094	CG16720	5-HT1A	Negative		-	Negative		-	Negative		http://flybase.org/reports/FBgn0004168.html	http://www.omim.org/entry/109760	5-hydroxytryptamine (serotonin) receptor 1A (5-HT1A).
105294	CG9922	CG9922	Negative		-	Negative		-	Negative		http://flybase.org/reports/FBgn0038196.html	http://www.omim.org/entry/612784
107993	CG11895	stan	Negative		-	Negative		-	Negative		http://flybase.org/reports/FBgn0024836.html	http://www.omim.org/entry/604265	starry night (stan).
100232	CG14696	CG14696	Negative		-	Negative		-	Negative		http://flybase.org/reports/FBgn0037853.html		Human arrestin domain containing 1 (ARRDC1) ortholog.
100088	CG30340	CG30340	Negative		-	Negative		-	Negative		http://flybase.org/reports/FBgn0050340.html
100786	CG11417	CG11417	Negative		-	Negative		-	Negative		http://flybase.org/reports/FBgn0024364.html		Human ESF1 nucleolar pre-rRNA processing protein homolog (ESF1) ortholog.
101866	CG6356	CG6356	Negative		-	Negative		-	Negative		http://flybase.org/reports/FBgn0039178.html	http://www.omim.org/entry/602608
104206	CG13801	CG13801	Negative		-	Negative		-	Negative		http://flybase.org/reports/FBgn0035332.html	https://www.omim.org/entry/611409	Human OCA2 melanosomal transmembrane protein (OCA2) ortholog. HGNC:8101.
100351	CG9981	CG9981	Negative		-	Negative		-	Negative		http://flybase.org/reports/FBgn0030746.html	http://www.omim.org/entry/300516
100122	CG31256	Brf	Negative		-	Negative		-	Negative		http://flybase.org/reports/FBgn0038499.html	http://www.omim.org/entry/604902	Brf (Brf).
103201	CG6395	Csp	Negative		-	Negative		-	Negative		http://flybase.org/reports/FBgn0004179.html	http://www.omim.org/entry/611203	Cysteine string protein (Csp).
108506	CG10698	CrzR	Negative		-	Negative		-	Negative		http://flybase.org/reports/FBgn0036278.html	http://www.omim.org/entry/138850	Corazonin receptor (CrzR).
100246	CG32475	mthl8	Negative		-	Negative		-	Negative		http://flybase.org/reports/FBgn0052475.html		methuselah-like 8 (mthl8). Human adhesion G protein-coupled receptor F3 (ADGRF3) ortholog. Low homology.
106546	CG33481	dpr7	Negative		-	Negative		-	Negative		http://flybase.org/reports/FBgn0053481.html		defective proboscis extension response 7 (dpr7). No human ortholog.
105614	CG10260	PI4KIIIalpha	Negative		-	Negative		-	Negative		http://flybase.org/reports/FBgn0267350.html	http://www.omim.org/entry/600286	Phosphatidylinositol 4-kinase III alpha (PI4KIIIalpha).
100119	CG11378	CG11378	Negative		-	Negative		-	Negative		http://flybase.org/reports/FBgn0040364.html		No human ortholog.
100209	CG1896	CG1896	Negative		-	Negative		-	Negative		http://flybase.org/reports/FBgn0039870.html	http://www.omim.org/entry/608138
100220	CG11670	CG11670	Negative		-	Negative		-	Negative		http://flybase.org/reports/FBgn0038114.html
100274	CG3564	CHOp24	Negative		-	Negative		-	Negative		http://flybase.org/reports/FBgn0029709.html		CHOp24 (CHOp24). Human transmembrane p24 trafficking protein 2 (TMED2) ortholog.
107730	CG34349	stac	Negative		-	Negative		-	Negative		http://flybase.org/reports/FBgn0266719.html	http://www.omim.org/entry/608897	staccato (stac).
106489	CG8722	Nup44A	Negative		-	Negative		-	Negative		http://flybase.org/reports/FBgn0033247.html	http://www.omim.org/entry/609263	Nucleoporin at 44A (Nup44A).
108458	CG7073	Sar1	Negative		-	Negative		-	Negative		http://flybase.org/reports/FBgn0038947.html	http://www.omim.org/entry/607690	Secretion-associated Ras-related 1 (Sar1).
104046	CG15155	CG15155	Negative		-	Positive		No	Negative		http://flybase.org/reports/FBgn0032669.html	https://www.omim.org/entry/614763	Human glycine-N-acyltransferase like 3 (GLYATL3) ortholog. HGNC:21349.
101498	CG6066	CG6066	Negative		-	Negative		-	Negative		http://flybase.org/reports/FBgn0039488.html	http://www.omim.org/entry/300766
104043	CG14763	CG14763	Negative		-	Negative		-	Negative		http://flybase.org/reports/FBgn0033243.html	http://www.omim.org/entry/186977
105736	CG11577	CG11577	Negative		-	Negative		-	Negative		http://flybase.org/reports/FBgn0036847.html	http://www.omim.org/entry/610047
103372	CG1218	CG1218	Negative		-	Positive		No	Negative		http://flybase.org/reports/FBgn0037377.html	http://www.omim.org/entry/616614
105163	CG12031	MED14	Negative		-	Negative		-	Negative		http://flybase.org/reports/FBgn0035145.html	http://www.omim.org/entry/300182	Mediator complex subunit 14 (MED14).
104462	CG7735	Arl6	Negative		-	Negative		-	Negative		http://flybase.org/reports/FBgn0034446.html	http://www.omim.org/entry/608845	ADP ribosylation factor-like 6 (Arl6).
104433	CG7039	Arfrp1	Negative		-	Negative		-	Negative		http://flybase.org/reports/FBgn0030088.html	http://www.omim.org/entry/604699	ADP-ribosylation factor related protein 1 (Arfrp1).
104402	CG9650	CG9650	Negative		-	Negative		-	Negative		http://flybase.org/reports/FBgn0029939.html	http://www.omim.org/entry/606558
104353	CG6030	ATPsynD	Negative		-	Negative		-	Negative		http://flybase.org/reports/FBgn0016120.html		ATP synthase, subunit D (ATPsynD). Human ATP synthase, H+ transporting, mitochondrial Fo complex subunit D (ATP5H) ortholog. HGNC:845.
101975	CG34367	CG34367	Negative		-	Negative		-	Negative		http://flybase.org/reports/FBgn0085396.html	http://www.omim.org/entry/312865
100716	CG42679	Lmpt	Negative		-	Negative		-	Negative		http://flybase.org/reports/FBgn0261565.html	http://www.omim.org/entry/602633	Limpet (Lmpt).
100841	CG33505	U3-55K	Negative		-	Negative		-	Negative		http://flybase.org/reports/FBgn0053505.html		U3 small nuclear riboprotein factor 55K (U3-55K). Human ribosomal RNA processing 9, small subunit (SSU) processome component, homolog (yeast) (RRP9) ortholog. HGNC:16829.
103757	CG8790	Dic1	Negative		-	Negative		-	Negative		http://flybase.org/reports/FBgn0027610.html	http://www.omim.org/entry/606794	Dicarboxylate carrier 1 (Dic1).
100690	CG1249	SmD2	Negative		-	Negative		-	Negative		http://flybase.org/reports/FBgn0261789.html	http://www.omim.org/entry/601061	Small ribonucleoprotein particle protein SmD2 (SmD2).
105884	CG17698	CG17698	Negative		-	Negative		-	Negative		http://flybase.org/reports/FBgn0040056.html	http://www.omim.org/entry/611411
100877	CG31524	CG31524	Negative		-	Negative		-	Negative		http://flybase.org/reports/FBgn0051524.html	http://www.omim.org/entry/176710
104304	CG5303	mei-S332	Negative		-	Negative		-	Negative		http://flybase.org/reports/FBgn0002715.html		meiotic from via Salaria 332 (mei-S332). No human ortholog.
110294	CG14881	CG14881	Negative		-	Negative		-	Negative		http://flybase.org/reports/FBgn0038425.html		Human armadillo repeat containing 7 (ARMC7) ortholog. HGNC:26168.
101925	CG12052	lola	Positive		No	Negative		-	Negative		http://flybase.org/reports/FBgn0005630.html	http://www.omim.org/entry/606025	longitudinals lacking (lola). Low DIOPT score.
100880	CG6680	Spn77Ba	Negative		-	Negative		-	Negative		http://flybase.org/reports/FBgn0262057.html		Serpin 77Ba (Spn77Ba).
100738	CG3988	gammaSnap1	Negative		-	Negative		-	Negative		http://flybase.org/reports/FBgn0028552.html	http://www.omim.org/entry/603216	gamma Soluble NSF attachment protein 1 (gammaSnap1).
102459	CG5674	CG5674	Negative		-	Negative		-	Negative		http://flybase.org/reports/FBgn0032656.html		No human ortholog.
101547	CG10574	I-2	Negative		-	Negative		-	Negative		http://flybase.org/reports/FBgn0028429.html	http://www.omim.org/entry/601792	Inhibitor-2 (I-2).
105133	CG10370	Rpt5	Negative		-	Negative		-	Negative		http://flybase.org/reports/FBgn0028684.html	http://www.omim.org/entry/186852	Regulatory particle triple-A ATPase 5 (Rpt5).
101531	CG1133	odd paired	Negative		-	Negative		-	Negative
110684	CG6638	CG6638	Negative		-	Negative		-	Negative		http://flybase.org/reports/FBgn0035911.html	http://www.omim.org/entry/607036
101065	CG2187	CG2187	Negative		-	Negative		-	Negative		http://flybase.org/reports/FBgn0017448.html	http://www.omim.org/entry/601843
102553	CG15719	CG15719	Negative		-	Negative		-	Negative		http://flybase.org/reports/FBgn0030440.html
106511	CG3856	Oamb	Negative		-	Negative		-	Negative		http://flybase.org/reports/FBgn0024944.html	http://www.omim.org/entry/104221	Octopamine receptor in mushroom bodies (Oamb).
105694	CGnone	Msp300	Negative		-	Negative		-	Negative		http://flybase.org/reports/FBgn0261836.html	http://www.omim.org/entry/608441	Alias CG42768. Muscle-specific protein 300 kDa (Msp300).
102818	CG10129	nudel	Negative		-	Negative		-	Negative		http://flybase.org/reports/FBgn0002926.html
101662	CG7644	beat-Ib	Negative		-	Negative		-	Negative		http://flybase.org/reports/FBgn0028645.html	http://www.omim.org/entry/609938	beat-Ib (beaten path Ib). Low DIOPT score.
103036	CG13737	CG13737	Negative		-	Negative		-	Negative		http://flybase.org/reports/FBgn0036382.html		No human ortholog.
109669	CG14130	CG14130	Negative		-	Negative		-	Negative		http://flybase.org/reports/FBgn0036210.html	http://www.omim.org/entry/613305
110720	CG12765	fsd	Negative		-	Negative		-	Negative		http://flybase.org/reports/FBgn0033813.html		fates-shifted (fsd). Human transmembrane protein 183A (TMEM183A) ortholog. HGNC:20173.
103278	CG12560	CG12560	Negative		-	Negative		-	Negative		http://flybase.org/reports/FBgn0031974.html	http://www.omim.org/entry/614763
101166	CG12283	kek1	Negative		-	Positive		No	Negative		http://flybase.org/reports/FBgn0015399.html	http://www.omim.org/entry/602059	kekkon-1 (kek1).
105004	CG33273	Ilp5	Negative		-	Negative		-	Negative		http://flybase.org/reports/FBgn0044048.html		Insulin-like peptide 5 (Ilp5). Human INS-IGF2 readthrough (INS-IGF2) ortholog. HGNC:33527.
105355	CG17927	Mhc	Negative		-	Negative		-	Negative		http://flybase.org/reports/FBgn0264695.html	http://www.omim.org/entry/160760	Myosin heavy chain (Mhc).
101658	CG6122	piwi	Negative		-	Negative		-	Negative		http://flybase.org/reports/FBgn0004872.html	http://www.omim.org/entry/610315	P-element induced wimpy testis (piwi).
101743	CG42314	PMCA	Negative		-	Negative		-	Negative		http://flybase.org/reports/FBgn0259214.html	http://www.omim.org/entry/300014	plasma membrane calcium ATPase (PMCA).
102595	CG11768	CG11768	Negative		-	Negative		-	Negative		http://flybase.org/reports/FBgn0037625.html	http://www.omim.org/entry/102540	Low DIOPT score.
110558	CG1883	RpS7	Negative		-	Negative		-	Negative		http://flybase.org/reports/FBgn0039757.html	http://www.omim.org/entry/603658	Ribosomal protein S7 (RpS7).
102653	CG16719	CG16719	Negative		-	Negative		-	Negative		http://flybase.org/reports/FBgn0036029.html	http://www.omim.org/entry/610674
101413	CG5411	Pde8	Negative		-	Negative		-	Negative		http://flybase.org/reports/FBgn0266377.html	http://www.omim.org/entry/603390	Phosphodiesterase 8 (Pde8). Alias CG45019.
108029	CG31335	Gr93d	Negative		-	Positive	http://www.iiserpune.ac.in/rnai/uploads/research/1282/images/de8b0_108029_CG31335_Gutsory-receptor-93d_Y.jpg	No	Negative		http://flybase.org/reports/FBgn0045468.html		Gustatory receptor 93d (Gr93d). No human ortholog.
101991	CG13316	Mnt	Negative		-	Positive	http://www.iiserpune.ac.in/rnai/uploads/research/1283/images/c9cc1_101991_CG13316_Y.jpg	No	Negative		http://flybase.org/reports/FBgn0023215.html	http://www.omim.org/entry/603039	MAX network transcriptional repressor (Mnt).
102562	CG13874	Obp56h	Negative		-	Negative		-	Negative		http://flybase.org/reports/FBgn0034475.html		Odorant-binding protein 56h (Obp56h). No human ortholog.
105101	CG1512	Cul2			-	Negative		-	Negative		http://flybase.org/reports/FBgn0032956.html	http://www.omim.org/entry/603135	Cullin 2 (Cul2).
101422	CG6259	Vps60			-	Negative		-	Negative		http://flybase.org/reports/FBgn0036740.html	http://www.omim.org/entry/610900	Vacuolar protein sorting 60 (Vps60).
100987	CG6772	Slob	Negative		-	Negative		-	Negative		http://flybase.org/reports/FBgn0264087.html	http://www.omim.org/entry/611450	Slowpoke binding protein (Slob). Alias CG43756.
101636	CG4432	PGRP-LC	Negative		-	Negative		-	Negative		http://flybase.org/reports/FBgn0035976.html	http://www.omim.org/entry/608197	Peptidoglycan recognition protein LC (PGRP-LC).
101267	CG16888	CG16888	Negative		-	Negative		-	Negative		http://flybase.org/reports/FBgn0032533.html		No human ortholog.
101759	CG9533	rut	Negative		-	Negative		-	Negative		http://flybase.org/reports/FBgn0003301.html	http://www.omim.org/entry/103072	rutabaga (rut).
101511	CG8376	ap	Negative		-	Negative		-	Negative		http://flybase.org/reports/FBgn0000099.html	http://www.omim.org/entry/603759	apterous (ap).
105972	CG15737	wisp	Negative		-	Negative		-	Negative		http://flybase.org/reports/FBgn0260780.html	http://www.omim.org/entry/614121	wispy (wisp).
101563	CG13116	CG13116	Negative		-	Negative		-	Negative		http://flybase.org/reports/FBgn0032139.html		No human ortholog.
101468	CG17265	CG17265	Negative		-	Negative		-	Negative		http://flybase.org/reports/FBgn0031488.html		Human coiled-coil domain containing 85C (CCDC85C) ortholog. HGNC:35459.
101708	CG9668	Rh4	Negative		-	Negative		-	Negative		http://flybase.org/reports/FBgn0003250.html	http://www.omim.org/entry/606665	Rhodopsin 4 (Rh4).
109519	CG14810	CG14810	Negative		-	Negative		-	Negative		http://flybase.org/reports/FBgn0029589.html		No human ortholog.
101395	CG2872	AstA-R1	Negative		-	Negative		-	Negative		http://flybase.org/reports/FBgn0266429.html	http://www.omim.org/entry/603691	Allatostatin A receptor 1 (AstA-R1).
101415	CG16892	CG16892	Negative		-	Negative		-	Negative		http://flybase.org/reports/FBgn0030122.html	http://www.omim.org/entry/605378
101260	CG30177	CG30177	Negative		-	Negative		-	Negative		http://flybase.org/reports/FBgn0050177.html	http://www.omim.org/entry/609348
109108	CG12559	rl	Negative		-	Negative		-	Negative		http://flybase.org/reports/FBgn0003256.html	http://www.omim.org/entry/176948	rolled (rl). Also identified as 109573/KK in VDRC database? Only listed as 109108/KK in Flybase.
104966	CG14723	HisCl1	Negative		-	Negative		-	Negative		http://flybase.org/reports/FBgn0037950.html	http://www.omim.org/entry/138491	Histamine-gated chloride channel subunit 1 (HisCl1).
102203	CG14251	paternal-haploid	Negative		-	Negative		-	Negative		http://flybase.org/reports/FBgn0002838.html
106919	CG7693	fray	Negative		-	Negative		-	Negative		http://flybase.org/reports/FBgn0023083.html	http://www.omim.org/entry/604046	frayed (fray).
106931	CG17221	CG17221	Negative		-	Negative		-	Negative		http://flybase.org/reports/FBgn0031500.html	http://www.omim.org/entry/610502
107735	CG3567	Cyp6u1	Negative		-	Negative		-	Negative		http://flybase.org/reports/FBgn0033121.html	http://www.omim.org/entry/274180	Cyp6u1 (Cyp6u1).
107468	CG14200	CG14200	Negative		-	Negative		-	Negative		http://flybase.org/reports/FBgn0031023.html		No human ortholog.
110023	CG18823	CG18823	Negative		-	Negative		-	Negative		http://flybase.org/reports/FBgn0042146.html		No human ortholog.
109502	CG14981	mge	Negative		-	Negative		-	Negative		http://flybase.org/reports/FBgn0035473.html	http://www.omim.org/entry/607046	maggie (mge).
109296	CG11859	RIOK2	Negative		-	Negative		-	Negative		http://flybase.org/reports/FBgn0039306.html		RIO kinase 2 (RIOK2). Human RIO kinase 2 (RIOK2) ortholog.
100070	CG42345	laccase 2	Negative		-	Negative		-	Negative		http://flybase.org/reports/FBgn0259247.html	http://www.omim.org/entry/117700	laccase 2 (laccase 2).
100036	CG11527	Tiggrin	Negative		-	Negative		-	Negative		http://flybase.org/reports/FBgn0011722.html
100097	CG7357	CG7357	Negative		-	Negative		-	Negative		http://flybase.org/reports/FBgn0038551.html
100094	CG10541	Tektin-C	Negative		-	Negative		-	Negative		http://flybase.org/reports/FBgn0035638.html	http://www.omim.org/entry/609002	Tektin C (Tektin-C).
100076	CG3788	CG3788	Negative		-	Negative		-	Negative		http://flybase.org/reports/FBgn0034800.html	http://www.omim.org/entry/191730
100077	CG42280	ome	Negative		-	Negative		-	Negative		http://flybase.org/reports/FBgn0259175.html	http://www.omim.org/entry/600403	omega (ome).
100026	CG14651	CG14651	Negative		-	Negative		-	Negative		http://flybase.org/reports/FBgn0037254.html		No human ortholog.
100045	CG18568	CG18568	Negative		-	Negative		-	Negative		http://flybase.org/reports/FBgn0033888.html
100063	CG15550	CG15550	Negative		-	Negative		-	Negative		http://flybase.org/reports/FBgn0039811.html		No human ortholog.
100022	CG32407	CG32407	Negative		-	Negative		-	Negative		http://flybase.org/reports/FBgn0052407.html		Human motile sperm domain containing 2 (MOSPD2) ortholog. HGNC:28381.
100093	CG17929	CG17929	Negative		-	Negative		-	Negative		http://flybase.org/reports/FBgn0038415.html
100083	CG11906	CG11906	Negative		-	Negative		-	Negative		http://flybase.org/reports/FBgn0034425.html
100031	CG2453	CG2453	Negative		-	Negative		-	Negative		http://flybase.org/reports/FBgn0030460.html	http://www.omim.org/entry/616359
100043	CG33119	NimB1	Negative		-	Negative		-	Negative		http://flybase.org/reports/FBgn0027929.html		Nimrod B1 (NimB1).
100059	CG31530	CG31530	Negative		-	Negative		-	Negative		http://flybase.org/reports/FBgn0264907.html	http://www.omim.org/entry/602608	Alias CG44098.
100052	CG8147	CG8147	Negative		-	Negative		-	Negative		http://flybase.org/reports/FBgn0043791.html	http://www.omim.org/entry/171760
100001	CG9373	rump	Negative		-	Negative		-	Negative		http://flybase.org/reports/FBgn0267790.html		Rumpelstiltskin (rump). Human myelin expression factor 2 (MYEF2) ortholog. HGNC:17940.
100087	CG11475	CG11475	Negative		-	Negative		-	Negative		http://flybase.org/reports/FBgn0034687.html	http://www.omim.org/entry/616332
100013	CG9773	CG9773	Negative		-	Negative		-	Negative		http://flybase.org/reports/FBgn0037609.html		Human unc-50 inner nuclear membrane RNA binding protein (UNC50) ortholog. HGNC:16046.
100074	CG15435	CG15435	Negative		-	Negative		-	Negative		http://flybase.org/reports/FBgn0031608.html		No human ortholog.
104313	CG14938	crol	Negative		-	Negative		-	Negative		http://flybase.org/reports/FBgn0020309.html	http://www.omim.org/entry/613904	crooked legs (crol).
101677	CG12196	egg	Negative		-	Negative		-	Negative		http://flybase.org/reports/FBgn0086908.html	http://www.omim.org/entry/604396	eggless (egg).
105398	CG10627	nst	Negative		-	Negative		-	Negative		http://flybase.org/reports/FBgn0036298.html	http://www.omim.org/entry/172100	nesthocker (nst).
101499	CG8593	qm	Negative		-	Negative		-	Negative		http://flybase.org/reports/FBgn0019662.html	http://www.omim.org/entry/606982	quemao (qm).
105126	CG7034	Sec15	Negative		-	Negative		-	Negative		http://flybase.org/reports/FBgn0266674.html	http://www.omim.org/entry/609672	Secretory 15 (Sec15).
105186	CG1652	lectin-46Cb	Negative		-	Negative		-	Negative		http://flybase.org/reports/FBgn0040092.html	http://www.omim.org/entry/609962	lectin-46Cb (lectin-46Cb).
102614	CG13538	CG13538	Negative		-	Negative		-	Negative		http://flybase.org/reports/FBgn0034820.html		No human ortholog.
108931	CG7382	CG7382	Negative		-	Negative		-	Negative		http://flybase.org/reports/FBgn0031708.html	http://www.omim.org/entry/615180
106908	CG32117	CG32117	Negative		-	Negative		-	Negative		http://flybase.org/reports/FBgn0052117.html		No human ortholog.
101313	CG9968	AnxB11	Negative		-	Negative		-	Negative		http://flybase.org/reports/FBgn0030749.html	http://www.omim.org/entry/602572	Annexin B11 (AnxB11).
101409	CG5266	Prosalpha2	Negative		-	Negative		-	Negative		http://flybase.org/reports/FBgn0086134.html	http://www.omim.org/entry/176842	Proteasome alpha 2 subunit (Prosalpha2).
102649	CG9300	CG9300	Negative		-	Negative		-	Negative		http://flybase.org/reports/FBgn0036886.html	http://www.omim.org/entry/615366
102451	CG12522	CG12522	Negative		-	Negative		-	Negative		http://flybase.org/reports/FBgn0036131.html		No human ortholog.
102397	CG7180	Ptp36E	Negative		-	Negative		-	Negative		http://flybase.org/reports/FBgn0267486.html	http://www.omim.org/entry/602545	Protein tyrosine phosphatase 36E (Ptp36E).
101495	CG14792	sta	Negative		-	Negative		-	Negative		http://flybase.org/reports/FBgn0003517.html	http://www.omim.org/entry/150370	stubarista (sta).
102419	CG34398	CG34398	Negative		-	Negative		-	Negative		http://flybase.org/reports/FBgn0085427.html		No human ortholog.
102011	CG6253	RpL14	Negative		-	Negative		-	Negative		http://flybase.org/reports/FBgn0017579.html		Ribosomal protein L14 (RpL14). Human ribosomal protein L14 (RPL14) ortholog. HGNC:10305.
105153	CG8470	mRpS30	Negative		-	Negative		-	Negative		http://flybase.org/reports/FBgn0030692.html	http://www.omim.org/entry/611991	mitochondrial ribosomal protein S30 (mRpS30).
102488	CG7105	Proc	Negative		-	Negative		-	Negative		http://flybase.org/reports/FBgn0045038.html		Proctolin (Proc). No human ortholog.
107405	CG1935	JTBR	Negative		-	Negative		-	Negative		http://flybase.org/reports/FBgn0025820.html	http://www.omim.org/entry/604671
104036	CG30142	Obp57b	Negative		-	Negative		-	Negative		http://flybase.org/reports/FBgn0043534.html		Odorant-binding protein 57b (Obp57b).
104995	CG30000	GstT1	Negative		-	Negative		-	Negative		http://flybase.org/reports/FBgn0050000.html		Glutathione S transferase T1 (GstT1). Human glutathione S-transferase theta 2B (gene/pseudogene) (GSTT2B) ortholog.
106777	CG8440	Lis-1	Negative		-	Negative		-	Negative		http://flybase.org/reports/FBgn0015754.html	http://www.omim.org/entry/601545	Lissencephaly-1 (Lis-1).
104553	CG13198	CG13198	Negative		-	Positive		No	Negative		http://flybase.org/reports/FBgn0033640.html		No human ortholog.
100025	CG9232	GALT	Negative		-	Negative		-	Negative		http://flybase.org/reports/FBgn0263200.html
108426	CG10311	CG10311	Negative		-	Negative		-	Negative		http://flybase.org/reports/FBgn0038420.html		No human ortholog.
100012	CG9410	CG9410	Negative		-	Negative		-	Negative		http://flybase.org/reports/FBgn0033086.html
106815	CG14932	CG14932	Negative		-	Negative		-	Negative		http://flybase.org/reports/FBgn0032375.html		No human ortholog.
101672	CG4154	Gyc88E	Negative		-	Negative		-	Negative		http://flybase.org/reports/FBgn0038295.html	http://www.omim.org/entry/139397	Guanylyl cyclase at 88E (Gyc88E).
108550	CG13396	fy	Negative		-	Negative		-	Negative		http://flybase.org/reports/FBgn0001084.html	http://www.omim.org/entry/610622	fuzzy (fy).
108166	CG12923	CG12923	Negative		-	Negative		-	Negative		http://flybase.org/reports/FBgn0033461.html		No human ortholog.
110160	CG8210	Vha14-1	Negative		-	Negative		-	Negative		http://flybase.org/reports/FBgn0262512.html	http://www.omim.org/entry/607160	Vacuolar H+ ATPase 14kD subunit 1 (Vha14-1).
100004	CG5859	INTS8	Negative		-	Negative		-	Positive		http://flybase.org/reports/FBgn0025830.html	http://omim.org/entry/611351	Integrator 8 (INTS8).
108168	CG1193	kat-60L1	Negative		-	Negative		-	Negative		http://flybase.org/reports/FBgn0037375.html	http://www.omim.org/entry/614764	katanin p60-like 1 (kat-60L1).
100066	CG13725	CG13725	Negative		-	Negative		-	Negative		http://flybase.org/reports/FBgn0036708.html
100060	CG4445	Pgant3	Negative		-	Negative		-	Negative		http://flybase.org/reports/FBgn0027558.html
109034	CG33810	His1:CG33810	Negative		-	Negative		-	Negative		http://flybase.org/reports/FBgn0053810.html	http://www.omim.org/entry/142711	His1:CG33810 (His1:CG33810).
100017	CG13690	CG13690	Negative		-	Negative		-	Negative		http://flybase.org/reports/FBgn0031252.html	http://www.omim.org/entry/606034
101434	CG12809	nerfin-2	Negative		-	Negative		-	Negative		http://flybase.org/reports/FBgn0041105.html	http://www.omim.org/entry/600010	nervous fingers 2 (nerfin-2).
100075	CG33771	CG33771	Negative		-	Negative		-	Negative		http://flybase.org/reports/FBgn0053771.html
106899	CG15237	CG15237	Negative		-	Negative		-	Negative		http://flybase.org/reports/FBgn0033104.html	http://www.omim.org/entry/614717	Low DIOPT score.
108432	CG6008	NP15.6	Negative		-	Negative		-	Negative		http://flybase.org/reports/FBgn0027785.html	http://www.omim.org/entry/300403	NP15.6 (NP15.6).
100084	CG4790	fs(1)M3	Negative		-	Negative		-	Negative		http://flybase.org/reports/FBgn0005390.html		female sterile (1) M3 (fs(1)M3). No human ortholog.
101663	CG10712	Chro	Negative		-	Negative		-	Negative		http://flybase.org/reports/FBgn0044324.html		Chromator (Chro).
101689	CG4701	CG4701	Negative		-	Negative		-	Negative		http://flybase.org/reports/FBgn0028868.html	http://www.omim.org/entry/614452
100005	CG8885	Scox	Negative		-	Negative		-	Negative		http://flybase.org/reports/FBgn0262467.html	http://www.omim.org/entry/603644	Synthesis of cytochrome c oxidase (Scox).
108404	CG15929	lin-52	Negative		-	Negative		-	Negative		http://flybase.org/reports/FBgn0029800.html		lin-52 (lin-52). Human lin-52 DREAM MuvB core complex component (LIN52) ortholog. HGNC:19856.
106885	CG5079	CG5079	Negative		-	Negative		-	Negative		http://flybase.org/reports/FBgn0039346.html		No human ortholog.
100009	CG9984	TH1	Negative		-	Negative		-	Negative		http://flybase.org/reports/FBgn0010416.html	http://www.omim.org/entry/605297	TH1 (TH1). Also known as NELF-d.
101318	CG18009	Trf2	Negative		-	Negative		-	Negative		http://flybase.org/reports/FBgn0261793.html	http://www.omim.org/entry/605521	TATA box binding protein-related factor 2 (Trf2).
101634	CG4123	Mipp1	Negative		-	Negative		-	Negative		http://flybase.org/reports/FBgn0026061.html	http://www.omim.org/entry/605391	Multiple inositol polyphosphate phosphatase 1 (Mipp1).
106840	CG30051	Tmem18	Negative		-	Negative		-	Negative		http://flybase.org/reports/FBgn0050051.html	http://www.omim.org/entry/613220	Tmem18 (Tmem18).
106830	CG6610	CG6610	Negative		-	Negative		-	Negative		http://flybase.org/reports/FBgn0035675.html	http://www.omim.org/entry/607285
110180	CG12292	spict	Negative		-	Negative		-	Negative		http://flybase.org/reports/FBgn0032451.html	http://www.omim.org/entry/608146	spichthyin (spict).
108377	CG9688	mRpS18C	Negative		-	Negative		-	Negative		http://flybase.org/reports/FBgn0039765.html	http://www.omim.org/entry/611983	mitochondrial ribosomal protein S18C (mRpS18C).
106875	CG6604	H15	Negative		-	Negative		-	Negative		http://flybase.org/reports/FBgn0016660.html	http://www.omim.org/entry/606061	H15 (H15).
101329	CG5686	chico	Negative		-	Negative		-	Negative		http://flybase.org/reports/FBgn0024248.html	http://www.omim.org/entry/147545	chico (chico).
108424	CG12066	Pka-C2	Negative		-	Negative		-	Negative		http://flybase.org/reports/FBgn0000274.html	http://www.omim.org/entry/176893	Protein kinase, cAMP-dependent, catalytic subunit 2 (Pka-C2).
108161	CG1620	CG1620	Negative		-	Negative		-	Negative		http://flybase.org/reports/FBgn0033183.html	http://www.omim.org/entry/616848
101443	CG14413	mRpS25	Negative		-	Negative		-	Negative		http://flybase.org/reports/FBgn0030572.html	http://www.omim.org/entry/611987	mitochondrial ribosomal protein S25 (mRpS25 ).
108160	CG6649	Ugt35b	Negative		-	Negative		-	Negative		http://flybase.org/reports/FBgn0026314.html	http://www.omim.org/entry/616382	UDP-glycosyltransferase 35b (Ugt35b).
107632	CG5660	ValRS-m	Negative		-	Negative		-	Negative		http://flybase.org/reports/FBgn0035942.html	http://www.omim.org/entry/612802	Valyl-tRNA synthetase, mitochondrial (ValRS-m).
108640	CG5395	nmd	Negative		-	Negative		-	Negative		http://flybase.org/reports/FBgn0005322.html	http://www.omim.org/entry/614452	no mitochondrial derivative (nmd).
106847	CG30109	CG30109	Negative		-	Negative		-	Negative		http://flybase.org/reports/FBgn0050109.html	http://www.omim.org/entry/614943
101596	CG6509	Dlg5	Negative		-	Negative		-	Negative		http://flybase.org/reports/FBgn0032363.html	http://www.omim.org/entry/604090	Discs large 5 (Dlg5).
108590	CG15087	Vps51	Negative		-	Negative		-	Negative		http://flybase.org/reports/FBgn0034380.html	http://www.omim.org/entry/615738	Vacuolar protein sorting 51 (Vps51).
100173	CG32476	mthl14	Negative		-	Negative		-	Negative		http://flybase.org/reports/FBgn0052476.html		methuselah-like 14 (mthl14).
100142	CG7309	CG7309	Negative		-	Negative		-	Negative		http://flybase.org/reports/FBgn0032314.html	http://www.omim.org/entry/606193
100179	CG42541	CG42541	Negative		-	Negative		-	Negative		http://flybase.org/reports/FBgn0260658.html	http://www.omim.org/entry/179503
104147	CG4965	twe	Negative		-	Negative		-	Negative		http://flybase.org/reports/FBgn0002673.html	http://www.omim.org/entry/116949	twine (twe).
103564	CG11920	CG11920	Negative		-	Negative		-	Negative		http://flybase.org/reports/FBgn0039274.html	http://www.omim.org/entry/612981
104183	CG12759	Dbp45A	Negative		-	Negative		-	Negative		http://flybase.org/reports/FBgn0010220.html		DEAD box protein 45A (Dbp45A). Human DEAD-box helicase 49 (DDX49) ortholog. HGNC:18684.
102735	CG14919	AstC	Negative		-	Negative		-	Negative		http://flybase.org/reports/FBgn0032336.html		Allatostatin C (AstC). No human ortholog.
104731	CG12051	Act42A	Negative		-	Negative		-	Negative		http://flybase.org/reports/FBgn0000043.html	http://www.omim.org/entry/102630	Actin 42A (Act42A).
105283	CG12190	RYBP	Negative		-	Negative		-	Negative		http://flybase.org/reports/FBgn0034763.html	http://www.omim.org/entry/607534	Ring and YY1 Binding Protein (RYBP).
100280	CG6846	RpL26	Negative		-	Negative		-	Negative		http://flybase.org/reports/FBgn0036825.html		Ribosomal protein L26 (RpL26). Human ribosomal protein L26 like 1 (RPL26L1). HGNC:17050.
104113	CG6225	CG6225	Negative		-	Negative		-	Negative		http://flybase.org/reports/FBgn0038072.html	http://www.omim.org/entry/300145
105281	CG8444	VhaM8.9	Negative		-	Negative		-	Negative		http://flybase.org/reports/FBgn0037671.html	http://www.omim.org/entry/300556	Vacuolar H+ ATPase M8.9 accessory subunit (VhaM8.9).
104640	CG8928	Rrp47	Negative		-	Negative		-	Negative		http://flybase.org/reports/FBgn0030711.html	http://www.omim.org/entry/606997	Ribosomal RNA processing 47 (Rrp47).
104715	CG10466	CG10466	Negative		-	Negative		-	Negative		http://flybase.org/reports/FBgn0032822.html		Human RNA binding motif protein, X-linked 2 (RBMX2) ortholog. HGNC:24282.
104178	CG1864	Hr38	Negative		-	Negative		-	Negative		http://flybase.org/reports/FBgn0014859.html	http://www.omim.org/entry/601828	Hormone receptor-like in 38 (Hr38).
105246	CG7861	Tbce	Negative		-	Negative		-	Negative		http://flybase.org/reports/FBgn0033055.html	http://www.omim.org/entry/604934	Tubulin-specific chaperone E (Tbce).
104668	CG4482	mol	Negative		-	Negative		-	Negative		http://flybase.org/reports/FBgn0086711.html	http://www.omim.org/entry/612771	moladietz (mol).
103643	CG6694	ZC3H3	Negative		-	Negative		-	Negative		http://flybase.org/reports/FBgn0035900.html		Human zinc finger CCCH-type containing 3 (ZC3H3) ortholog. HGNC:28972.
104188	CG10778	CG10778	Negative		-	Negative		-	Negative		http://flybase.org/reports/FBgn0029980.html	http://www.omim.org/entry/608172
107579	CG18543	mtrm	Negative		-	Negative		-	Negative		http://flybase.org/reports/FBgn0010431.html	http://www.omim.org/entry/608163	matrimony (mtrm). Low DIOPT score.
110553	cg14283	mitochondrial ribosomal protein L55			-			-	Negative		http://flybase.org/reports/FBgn0038678.html		not set with EGFR and Yki
102566	CG42687	CoRest			-			-	Negative		http://flybase.org/reports/FBgn0261573.html	http://www.omim.org/entry/607675	CoRest (CoRest ). not set with EGFR and Yki
107264	CG5081	Syx7	Negative		-	Negative		-	Negative		http://flybase.org/reports/FBgn0267849.html	http://www.omim.org/entry/603217	Syntaxin 7 (Syx7).
107200	CG14949	CG14949	Negative		-	Negative		-	Negative		http://flybase.org/reports/FBgn0035358.html		No human ortholog.
103392	CG13773	CG13773	Negative		-	Negative		-	Negative		http://flybase.org/reports/FBgn0042092.html	http://www.omim.org/entry/608312
107858	CG10864	CG10864	Negative		-	Negative		-	Negative		http://flybase.org/reports/FBgn0038621.html	http://www.omim.org/entry/613655
107882	CG11997	CG11997	Negative		-	Negative		-	Negative		http://flybase.org/reports/FBgn0037662.html		No human ortholog.
107266	CG8874	FER	Negative		-	Negative		-	Negative		http://flybase.org/reports/FBgn0000723.html	http://www.omim.org/entry/176942	FER tyrosine kinase (FER).
106101	CG17180	CG17180	Negative		-	Negative		-	Negative		http://flybase.org/reports/FBgn0035140.html	http://www.omim.org/entry/616599
106046	CG3423	SA	Negative		-	Negative		-	Negative		http://flybase.org/reports/FBgn0020616.html	http://www.omim.org/entry/604358	Stromalin (SA).
107860	CG17836	Xrp1	Negative		-	Negative		-	Negative		http://flybase.org/reports/FBgn0261113.html		Xrp1 (Xrp1). No human ortholog.
106692	CG15747	CG15747	Negative		-	Negative		-	Negative		http://flybase.org/reports/FBgn0030474.html	http://www.omim.org/entry/616173
106078	CG6375	pit	Negative		-	Negative		-	Negative		http://flybase.org/reports/FBgn0266581.html	http://www.omim.org/entry/606355	pitchoune (pit).
109895	CG10671	CG10671	Negative		-	Negative		-	Negative		http://flybase.org/reports/FBgn0035586.html	http://www.omim.org/entry/612029
107277	CG5371	RnrL	Negative		-	Negative		-	Negative		http://flybase.org/reports/FBgn0011703.html	http://www.omim.org/entry/180410	Ribonucleoside diphosphate reductase large subunit (RnrL).
105392	CG11388	CG11388	Negative		-	Negative		-	Negative		http://flybase.org/reports/FBgn0034959.html	http://www.omim.org/entry/614552
106230	CG16998	CG16998	Negative		-	Negative		-	Negative		http://flybase.org/reports/FBgn0035795.html		Human protease, serine 57 (PRSS57) ortholog. HGNC:31397.
107846	CG9932	CG9932	Negative		-	Positive		No	Negative		http://flybase.org/reports/FBgn0262160.html	http://www.omim.org/entry/604083
105380	CG10354	Rat1	Negative		-	Negative		-	Negative		http://flybase.org/reports/FBgn0031868.html	http://www.omim.org/entry/608851	Rat1 5'-3' exoribonuclease (Rat1).
107283	CG2221	l(1)G0289	Negative		-	Negative		-	Negative		http://flybase.org/reports/FBgn0028331.html	http://www.omim.org/entry/606827	lethal (1) G0289 (l(1)G0289).
106071	CG14226	dome	Negative		-	Negative		-	Negative		http://flybase.org/reports/FBgn0043903.html		domeless (dome).
106676	CG11048	Efhc1.2	Negative		-	Negative		-	Negative		http://flybase.org/reports/FBgn0034487.html	http://www.omim.org/entry/300817	EFHC1 homologue 2 (Efhc1.2).
107906	CG3557	CG3557	Negative		-	Negative		-	Negative		http://flybase.org/reports/FBgn0031423.html		No human ortholog.
105668	CG8711	Cul4	Negative		-	Negative		-	Negative		http://flybase.org/reports/FBgn0033260.html	http://www.omim.org/entry/300304	Cullin 4 (Cul4).
105766	CG5890	CG5890	Negative		-	Negative		-	Negative		http://flybase.org/reports/FBgn0039380.html	http://www.omim.org/entry/604660
105123	CG12007	CG12007	Negative		-	Negative		-	Negative		http://flybase.org/reports/FBgn0037293.html	http://www.omim.org/entry/601905
104451	CG10474	CG10474	Negative		-	Negative		-	Negative		http://flybase.org/reports/FBgn0034427.html	http://www.omim.org/entry/613228
106752	CG13625	CG13625	Negative		-	Negative		-	Negative		http://flybase.org/reports/FBgn0039210.html		Human BUD13 homolog (BUD13).
105743	CG17183	MED30	Negative		-	Negative		-	Negative		http://flybase.org/reports/FBgn0035149.html	http://www.omim.org/entry/610237	Mediator complex subunit 30 (MED30).
104500	CG11654	Ahcy	Negative		-	Positive		No	Negative		http://flybase.org/reports/FBgn0014455.html	http://www.omim.org/entry/180960	Adenosylhomocysteinase (Ahcy).
103378	CG11926	Mon1	Negative		-	Positive		No	Negative		http://flybase.org/reports/FBgn0031640.html	http://www.omim.org/entry/611464	Monensin sensitivity 1 (Mon1).
104509	CG13954	CG13954	Negative		-	Negative		-	Negative		http://flybase.org/reports/FBgn0033405.html		No human ortholog.
103226	CG32071	CG32071	Negative		-	Negative		-	Negative		http://flybase.org/reports/FBgn0052071.html		No human ortholog.
104465	CG7266	Eip71CD	Negative		-	Positive		No	Negative		http://flybase.org/reports/FBgn0000565.html	http://www.omim.org/entry/601250	Ecdysone-induced protein 28/29kD (Eip71CD).
110428	CG6773	Sec13	Negative		-	Negative		-	Negative		http://flybase.org/reports/FBgn0024509.html	http://www.omim.org/entry/600152	Secretory 13 (Sec13).
104484	CG9667	CG9667	Negative		-	Positive		No	Negative		http://flybase.org/reports/FBgn0037550.html	http://www.omim.org/entry/612764
104548	CG9326	vari	Negative		-	Negative		-	Negative		http://flybase.org/reports/FBgn0250785.html	http://www.omim.org/entry/606959	varicose (vari).
103334	CG13067	CG13067	Negative		-	Negative		-	Negative		http://flybase.org/reports/FBgn0036589.html		No human ortholog.
104512	CG17717	CG17717	Negative		-	Negative		-	Negative		http://flybase.org/reports/FBgn0029877.html	http://www.omim.org/entry/613332
109642	CG6768	DNApol-epsiolon255	Negative		-	Negative		-	Negative		http://flybase.org/reports/FBgn0264326.html	http://www.omim.org/entry/174762	DNA polymerase epsilon 255kD subunit (DNApol-epsiolon255).
105721	CG15252	CG15252	Negative		-	Negative		-	Negative		http://flybase.org/reports/FBgn0030167.html		No human ortholog.
103917	CG32296	Mrtf	Negative		-	Negative		-	Negative		http://flybase.org/reports/FBgn0052296.html	http://www.omim.org/entry/606078	Myocardin-related transcription factor (Mrtf).
105760	CG10751	robl	Negative		-	Negative		-	Negative		http://flybase.org/reports/FBgn0024196.html	http://www.omim.org/entry/607168	roadblock (robl).
100048	CG32971	CG32971	Negative		-	Negative		-	Negative		http://flybase.org/reports/FBgn0052971.html	http://www.omim.org/entry/185641
100021	CG4389	Mtpalpha	Negative		-	Negative		-	Negative		http://flybase.org/reports/FBgn0028479.html	http://www.omim.org/entry/600890	Mitochondrial trifunctional protein alpha subunit (Mtpalpha).
100050	CG4827	veil	Negative		-	Negative		-	Negative		http://flybase.org/reports/FBgn0034225.html	http://www.omim.org/entry/129190	veil (veil).
100035	CG5872	CG5872	Negative		-	Negative		-	Negative		http://flybase.org/reports/FBgn0036991.html		No human ortholog.
100027	CG11012	Ugt37a1	Negative		-	Negative		-	Negative		http://flybase.org/reports/FBgn0026756.html	http://www.omim.org/entry/606428	UDP-glycosyltransferase 37a1 (Ugt37a1).
100030	CG12586	Mucin related 82C	Negative		-	Negative		-	Negative		http://flybase.org/reports/FBgn0037260.html
100062	CG7335	CG7335	Negative		-	Negative		-	Negative		http://flybase.org/reports/FBgn0036941.html
100233	CG11967	CAHbeta	Negative		-	Negative		-	Negative		http://flybase.org/reports/FBgn0037646.html		Carbonic anhydrase beta (CAHbeta). No human ortholog.
101766	CG4147	Hsc70-3	Negative		-	Negative		-	Negative		http://flybase.org/reports/FBgn0001218.html	http://www.omim.org/entry/138120	Heat shock 70-kDa protein cognate 3 (Hsc70-3).
105929	CG5056	CG5056	Negative		-	Negative		-	Negative		http://flybase.org/reports/FBgn0032231.html		Human oxidative stress responsive serine rich 1 (OSER1) ortholog. HGNC:16105.
100152	CG7164	CG7164	Negative		-	Negative		-	Negative		http://flybase.org/reports/FBgn0031946.html		No human ortholog.
100226	CG10203	x16	Negative		-	Negative		-	Negative		http://flybase.org/reports/FBgn0028554.html	http://www.omim.org/entry/600572	x16 splicing factor (x16).
107667	CG7630	CG7630	Negative		-	Negative		-	Negative		http://flybase.org/reports/FBgn0040793.html		No human ortholog.
105931	CG13847	CG13847	Negative		-	Negative		-	Negative		http://flybase.org/reports/FBgn0038967.html		No human ortholog.
100176	CG42271	CG42271	Negative		-	Negative		-	Negative		http://flybase.org/reports/FBgn0259166.html	http://www.omim.org/entry/600916
100131	CG6142	CG6142	Negative		-	Negative		-	Negative		http://flybase.org/reports/FBgn0039415.html		Human choline dehydrogenase (CHDH) ortholog. HGNC:24288.
103441	CG15461	CG15461	Negative		-	Negative		-	Negative		http://flybase.org/reports/FBgn0040649.html		No human ortholog.
110443	CG1817	Ptp10D	Negative		-	Negative		-	Negative		http://flybase.org/reports/FBgn0004370.html	http://www.omim.org/entry/176882	Protein tyrosine phosphatase 10D (Ptp10D).
105725	CG2574	CG2574	Negative		-	Negative		-	Negative		http://flybase.org/reports/FBgn0030386.html	http://www.omim.org/entry/604151
103440	CG13202	CG13202	Negative		-	Negative		-	Negative		http://flybase.org/reports/FBgn0033623.html	http://www.omim.org/entry/614677
103456	CG34114	CG34114	Negative		-	Negative		-	Negative		http://flybase.org/reports/FBgn0083950.html
110417	CG1977	alpha-Spec	Negative		-	Negative		-	Negative		http://flybase.org/reports/FBgn0250789.html	http://www.omim.org/entry/182810	alpha Spectrin (alpha-Spec).
103948	CG7275	CG7275	Negative		-	Negative		-	Negative		http://flybase.org/reports/FBgn0036500.html	http://www.omim.org/entry/616196
105189	CG2467	pot	Negative		-	Negative		-	Negative		http://flybase.org/reports/FBgn0250871.html		papillote (pot). No human ortholog.
104467	CG1821	RpL31	Negative		-	Negative		-	Negative		http://flybase.org/reports/FBgn0025286.html		Ribosomal protein L31 (RpL31). Human ribosomal protein L31 (RPL31) ortholog. HGNC:10334.
103922	CG8395	Rrp42	Negative		-	Negative		-	Negative		http://flybase.org/reports/FBgn0034065.html	http://www.omim.org/entry/606488	Rrp42 (Rrp42).
101508	CG4396	fne	Negative		-	Negative		-	Negative		http://flybase.org/reports/FBgn0086675.html	http://www.omim.org/entry/601673	found in neurons (fne).
103216	CG32625	CG32625	Negative		-	Negative		-	Negative		http://flybase.org/reports/FBgn0052625.html		Human gametocyte specific factor 1 like (GTSF1L) ortholog. HGNC:16198.
103929	CG4609	fax	Negative		-	Negative		-	Negative		http://flybase.org/reports/FBgn0014163.html		failed axon connections (fax). Human failed axon connections homolog (FAXC) ortholog. HGNC:20742.
104047	CG7181	COX8	Negative		-	Negative		-	Negative		http://flybase.org/reports/FBgn0263911.html	http://www.omim.org/entry/123870	Cytochrome c oxidase subunit 8 (COX8).
103387	CG6292	CycT	Negative		-	Negative		-	Negative		http://flybase.org/reports/FBgn0025455.html	http://www.omim.org/entry/143055	Cyclin T (CycT).
103393	CG3193	crn	Negative		-	Negative		-	Negative		http://flybase.org/reports/FBgn0000377.html	http://www.omim.org/entry/610952	crooked neck (crn).
103389	CG30429	CG30429	Negative		-	Negative		-	Negative		http://flybase.org/reports/FBgn0050429.html		Human MORN repeat containing 3 (MORN3) ortholog. HGNC:29807.
103270	CG17027	CG17027	Negative		-	Negative		-	Negative		http://flybase.org/reports/FBgn0036553.html	http://www.omim.org/entry/602064
103932	CG8237	CG8237	Negative		-	Negative		-	Negative		http://flybase.org/reports/FBgn0033350.html		Human family with sequence similarity 8 member A1 (FAM8A1) ortholog. HGNC:16372.
105165	CG3999	CG3999	Negative		-	Negative		-	Negative		http://flybase.org/reports/FBgn0037801.html	http://www.omim.org/entry/238300
105180	CG15125	CG15125	Negative		-	Negative		-	Negative		http://flybase.org/reports/FBgn0034463.html		No human ortholog.
103401	CG4759	RpL27	Negative		-	Negative		-	Negative		http://flybase.org/reports/FBgn0039359.html	http://www.omim.org/entry/607526	Ribosomal protein L27 (RpL27).
103282	CG9079	Cpr47Ea	Negative		-	Negative		-	Negative		http://flybase.org/reports/FBgn0033597.html		Cuticular protein 47Ea (Cpr47Ea). No human ortholog.
106769	CG11858	CG11858	Negative		-	Negative		-	Negative		http://flybase.org/reports/FBgn0039305.html	http://www.omim.org/entry/300252
105857	CG12986	CG12986	Negative		-	Negative		-	Negative		http://flybase.org/reports/FBgn0030868.html		No human ortholog.
103907	CG6712	CG6712	Negative		-	Negative		-	Negative		http://flybase.org/reports/FBgn0032408.html		Human ribosome production factor 1 homolog (RPF1) ortholog. HGNC:30350.
104449	CG11201	TTLL3B	Negative		-	Negative		-	Negative		http://flybase.org/reports/FBgn0031853.html		Tubulin tyrosine ligase-like 3B (TTLL3B). Human tubulin tyrosine ligase like 8 (TTLL8) ortholog. HGNC:34000.
107940	CG3388	gsb	Negative		-	Negative		-	Negative		http://flybase.org/reports/FBgn0001148.html	http://www.omim.org/entry/606597	gooseberry (gsb).
103939	CG7762	Rpn1	Negative		-	Negative		-	Negative		http://flybase.org/reports/FBgn0028695.html	http://www.omim.org/entry/606223	Regulatory particle non-ATPase 1 (Rpn1).
105182	CG10406	mRpS33	Negative		-	Negative		-	Negative		http://flybase.org/reports/FBgn0038426.html	http://www.omim.org/entry/611993	mitochondrial ribosomal protein S33 (mRpS33).
104039	CG31473	CG31473	Negative		-	Negative		-	Negative		http://flybase.org/reports/FBgn0051473.html	http://www.omim.org/entry/603287
103428	CG6443	CG6443	Negative		-	Negative		-	Negative		http://flybase.org/reports/FBgn0032290.html		Human replication termination factor 2 domain containing 1 (RTFDC1) ortholog. HGNC:15890.
107385	CG8781	tsu	Negative		-	Negative		-	Negative		http://flybase.org/reports/FBgn0033378.html	http://www.omim.org/entry/605313	tsunagi (tsu).
104081	CG32812	CG32812	Negative		-	Negative		-	Negative		http://flybase.org/reports/FBgn0025642.html	http://www.omim.org/entry/611585
108319	CG11249	CG11249	Negative		-	Negative		-	Negative		http://flybase.org/reports/FBgn0037115.html	http://www.omim.org/entry/179050
101892	CG13305	CG13305	Negative		-	Negative		-	Negative		http://flybase.org/reports/FBgn0035921.html		No human ortholog.
101877	CG12021	Patj	Negative		-	Negative		-	Negative		http://flybase.org/reports/FBgn0067864.html	http://www.omim.org/entry/603199	Patj (Patj).
106457	CG11888	Rpn2	Negative		-	Negative		-	Negative		http://flybase.org/reports/FBgn0028692.html		Regulatory particle non-ATPase 2 (Rpn2). Human proteasome 26S subunit, non-ATPase 1 (PSMD1) ortholog. HGNC:9554.
110183	CG8641	CG8641	Negative		-	Negative		-	Negative		http://flybase.org/reports/FBgn0035733.html	http://www.omim.org/entry/605550
100219	CG1887	dsb	Negative		-	Negative		-	Negative		http://flybase.org/reports/FBgn0035290.html	http://www.omim.org/entry/602257	debris buster (dsb).
100128	CG4090	Mur89F	Negative		-	Negative		-	Negative		http://flybase.org/reports/FBgn0038492.html		Mucin related 89F (Mur89F).
106548	CG31509	TotA	Negative		-	Negative		-	Negative		http://flybase.org/reports/FBgn0028396.html		turandot A (TotA). No human ortholog.
110197	CG5429	Atg6	Negative		-	Negative		-	Negative		http://flybase.org/reports/FBgn0264325.html	http://www.omim.org/entry/604378	Autophagy-related 6 (Atg6).
101761	CG10506	GlnRS	Negative		-	Negative		-	Negative		http://flybase.org/reports/FBgn0027090.html	http://www.omim.org/entry/603727	Glutaminyl-tRNA synthetase (GlnRS).
105704	CG13298	CG13298	Negative		-	Negative		-	Negative		http://flybase.org/reports/FBgn0035692.html	http://www.omim.org/entry/607835
108771	CG31206	CG31206	Negative		-	Negative		-	Negative		http://flybase.org/reports/FBgn0051206.html		No human ortholog.
108724	CG14174	CG14174	Negative		-	Negative		-	Negative		http://flybase.org/reports/FBgn0036036.html	http://www.omim.org/entry/617089	Low DIOPT score.
105471	CG2577	CG2577	Negative		-	Negative		-	Negative		http://flybase.org/reports/FBgn0030384.html	http://www.omim.org/entry/600505
106403	CG30415	roh	Negative		-	Negative		-	Negative		http://flybase.org/reports/FBgn0250838.html		reduction of Rh1 (roh). No human ortholog.
103959	CG32402	Or65b	Negative		-	Negative		-	Negative		http://flybase.org/reports/FBgn0041624.html		Odorant receptor 65b (Or65b). No human ortholog.
106245	CG5874	Nelf-A	Negative		-	Positive	http://www.iiserpune.ac.in/rnai/uploads/research/1540/images/77d0c_NELF-A.jpg	No	Negative		http://flybase.org/reports/FBgn0038872.html	http://www.omim.org/entry/606026	Negative elongation factor A (Nelf-A). Human negative elongation factor complex member A (NELFA) ortholog. HGNC:12768.
110208	CG6815	bor	Negative		-	Negative		-	Negative		http://flybase.org/reports/FBgn0040237.html	http://www.omim.org/entry/612316	belphegor (bor).
108834	CG1341	Rpt1	Negative		-	Negative		-	Negative		http://flybase.org/reports/FBgn0028687.html	http://www.omim.org/entry/154365	Regulatory particle triple-A ATPase 1 (Rpt1).
108402	CG3661	RpL23	Negative		-	Negative		-	Negative		http://flybase.org/reports/FBgn0010078.html	http://www.omim.org/entry/603662	Ribosomal protein L23 (RpL23).
108730	CG2960	RpL40	Negative		-	Negative		-	Negative		http://flybase.org/reports/FBgn0003941.html	http://www.omim.org/entry/191321	Ribosomal protein L40 (RpL40).
108694	CG6384	Cp190	Negative		-	Negative		-	Negative		http://flybase.org/reports/FBgn0000283.html		Centrosomal protein 190kD (Cp190).
108908	CG18096	Thioester-containing protein 1			-	Negative		-	Negative		http://flybase.org/reports/FBgn0041183.html
108918	CG7669	hmw	Negative		-	Negative		-	Negative		http://flybase.org/reports/FBgn0038607.html	http://www.omim.org/entry/616047	hemingway (hmw).
105653	CG2095	Sec8	Negative		-	Negative		-	Negative		http://flybase.org/reports/FBgn0266672.html	http://www.omim.org/entry/608185	Secretory 8 (Sec8).
110778	CG6227	CG6227	Negative		-	Negative		-	Negative		http://flybase.org/reports/FBgn0030631.html		Human DEAD-box helicase 46 (DDX46) ortholog. HGNC:18681.
106258	CG14127	CCDC151	Negative		-	Negative		-	Negative		http://flybase.org/reports/FBgn0036219.html	http://www.omim.org/entry/615956	Coiled-coil domain containing protein 151 (CCDC151).
101800	CG10280	CG10280	Negative		-	Negative		-	Negative		http://flybase.org/reports/FBgn0037395.html	http://www.omim.org/entry/608860
104945	CG32428	CG32428	Negative		-	Negative		-	Negative		http://flybase.org/reports/FBgn0052428.html		No human ortholog.
105310	CG14605	CG14605	Negative		-	Negative		-	Negative		http://flybase.org/reports/FBgn0037486.html	http://www.omim.org/entry/605245
108860	CG13096	CG13096	Negative		-	Negative		-	Negative		http://flybase.org/reports/FBgn0032050.html	http://www.omim.org/entry/615874
110321	CG10480	Rcc1	Negative		-	Negative		-	Negative		http://flybase.org/reports/FBgn0002638.html	http://www.omim.org/entry/179710	Regulator of chromosome condensation 1 (Rcc1).
105648	CG1515	Ykt6	Negative		-	Negative		-	Negative		http://flybase.org/reports/FBgn0260858.html	http://www.omim.org/entry/606209	YKT6 v-SNARE (Ykt6).
100196	CG14491	CG14491	Negative		-	Negative		-	Negative		http://flybase.org/reports/FBgn0034284.html		No human ortholog.
107558	CG4975	CG4975	Negative		-	Negative		-	Negative		http://flybase.org/reports/FBgn0034266.html	http://www.omim.org/entry/611150
105631	CG11994	Ada	Negative		-	Negative		-	Negative		http://flybase.org/reports/FBgn0037661.html		Adenosine deaminase (Ada). Human adenosine deaminase like (ADAL) ortholog.
108786	CG17707	CG17707	Negative		-	Negative		-	Negative		http://flybase.org/reports/FBgn0025835.html		No human ortholog.
108840	CG14788	Ns3	Negative		-	Negative		-	Negative		http://flybase.org/reports/FBgn0266284.html	http://www.omim.org/entry/610780	nucleostemin 3 (Ns3).
108830	CG1109	CG1109	Negative		-	Negative		-	Negative		http://flybase.org/reports/FBgn0046222.html		Human WD repeat domain 33 (WDR33) ortholog. HGNC:25651.
105635	CG4501	bgm	Negative		-	Negative		-	Negative		http://flybase.org/reports/FBgn0027348.html	http://www.omim.org/entry/614363	bubblegum (bgm).
108909	CG6220	CG6220	Negative		-	Negative		-	Negative		http://flybase.org/reports/FBgn0033865.html	http://www.omim.org/entry/607393
101857	CG14787	CG14787	Negative		-	Negative		-	Negative		http://flybase.org/reports/FBgn0027793.html
109503	CG4651	RpL13	Negative		-	Negative		-	Negative		http://flybase.org/reports/FBgn0011272.html	http://www.omim.org/entry/113703	Ribosomal protein L13 (RpL13).
106300	CG9975	CG9975	Negative		-	Negative		-	Negative		http://flybase.org/reports/FBgn0034435.html		No human ortholog.
106336	CG8383	Pnn	Negative		-	Negative		-	Negative		http://flybase.org/reports/FBgn0037737.html	http://www.omim.org/entry/603154	Pinin (Pnn).
105836	CG5341	Sec6	Negative		-	Negative		-	Negative		http://flybase.org/reports/FBgn0266671.html	http://www.omim.org/entry/608186	Secretory 6 (Sec6).
106371	CG3975	Pol32	Negative		-	Negative		-	Negative		http://flybase.org/reports/FBgn0283467.html	http://www.omim.org/entry/611415	Pol32 polymerase delta subunit (Pol32).
108881	CG13951	l(2)k10201	Negative		-	Negative		-	Negative		http://flybase.org/reports/FBgn0016970.html		l(2)k10201 (lethal (2) k10201). Human zinc finger protein 511 (ZNF511). HGNC:28445.
108650	CG6095	Exo84	Negative		-	Negative		-	Negative		http://flybase.org/reports/FBgn0266668.html	http://www.omim.org/entry/615283	Exocyst 84 (Exo84).
108829	CG4663	Pex13	Negative		-	Negative		-	Negative		http://flybase.org/reports/FBgn0033812.html	http://www.omim.org/entry/601789	Peroxin 13 (Pex13).
100138	CG18094	CG18094	Negative		-	Negative		-	Negative		http://flybase.org/reports/FBgn0032791.html		Human nudix hydrolase 19 (NUDT19) ortholog. HGNC:32036.
105354	CG2925	noi	Negative		-	Negative		-	Negative		http://flybase.org/reports/FBgn0014366.html	http://www.omim.org/entry/605596	noisette (noi).
101740	CG10851	B52	Negative		-	Negative		-	Negative		http://flybase.org/reports/FBgn0004587.html	http://www.omim.org/entry/601944	B52 (B52).
105260	CG7516	l(2)34Fd	Negative		-	Negative		-	Negative		http://flybase.org/reports/FBgn0261535.html	http://www.omim.org/entry/616197	lethal (2) 34Fd (l(2)34Fd).
105181	CG7398	Trn	Negative		-	Negative		-	Negative		http://flybase.org/reports/FBgn0024921.html	http://www.omim.org/entry/602901	Transportin (Trn).
107479	CG15347	CG15347	Negative		-	Negative		-	Negative		http://flybase.org/reports/FBgn0030040.html		No human ortholog.
107513	CG14275	CG14275	Negative		-	Negative		-	Negative		http://flybase.org/reports/FBgn0032022.html		No human ortholog.
110184	CG7766	CG7766	Negative		-	Negative		-	Negative		http://flybase.org/reports/FBgn0030087.html	http://www.omim.org/entry/300798
108700	CG31612	CG31612	Negative		-	Negative		-	Negative		http://flybase.org/reports/FBgn0051612.html
110459	CG4008	und	Negative		-	Positive	http://www.iiserpune.ac.in/rnai/uploads/research/1583/images/264c0_METAP2.jpg	No	Negative		http://flybase.org/reports/FBgn0025117.html	http://www.omim.org/entry/601870	uninitiated (und).
108173	CG10309	pad	Negative		-	Negative		-	Negative		http://flybase.org/reports/FBgn0038418.html		poils au dos (pad).
105980	CG4494	Smt3	Negative		-	Negative		-	Negative		http://flybase.org/reports/FBgn0264922.html	http://www.omim.org/entry/602231	Smt3 (Smt3).
107138	CG13742	CG13742	Negative		-	Negative		-	Negative		http://flybase.org/reports/FBgn0033372.html		No human ortholog.
107563	CG6751	nclb	Negative		-	Positive	http://www.iiserpune.ac.in/rnai/uploads/research/1587/images/eaf74_PWP1.jpg	No	Negative		http://flybase.org/reports/FBgn0263510.html		no child left behind (nclb). Human PWP1 homolog, endonuclein (PWP1) ortholog. HGNC:17015.
106940	CG30046	CG30046	Negative		-	Negative		-	Negative		http://flybase.org/reports/FBgn0050046.html	http://www.omim.org/entry/604989
106951	CG3361	mrt	Negative		-	Negative		-	Negative		http://flybase.org/reports/FBgn0039507.html		martik (mrt). No human ortholog.
110249	CG9072	CG9072	Negative		-	Negative		-	Negative		http://flybase.org/reports/FBgn0030614.html	http://www.omim.org/entry/610058
108002	CG8233	Rcd1	Negative		-	Negative		-	Negative		http://flybase.org/reports/FBgn0033897.html		Reduction in Cnn dots 1 (Rcd1). Human KAT8 regulatory NSL complex subunit 3 (KANSL3) ortholog. HGNC:25473.
108450	CG32743	nonC	Negative		-	Negative		-	Negative		http://flybase.org/reports/FBgn0263968.html	http://www.omim.org/entry/607032	no-on-and-no-off transient C (nonC).
105489	CG3262	CG3262	Negative		-	Negative		-	Negative		http://flybase.org/reports/FBgn0032986.html	http://www.omim.org/entry/613621
110229	CG1673	CG1673	Negative		-	Negative		-	Negative		http://flybase.org/reports/FBgn0030482.html	http://www.omim.org/entry/113520
105525	CG6593	Pp1alpha-96A	Negative		-	Negative		-	Negative		http://flybase.org/reports/FBgn0003134.html	http://www.omim.org/entry/176914	Protein phosphatase 1alpha at 96A (Pp1alpha-96A).
105377	CG11253	Zmynd10	Negative		-	Negative		-	Negative		http://flybase.org/reports/FBgn0266709.html	http://www.omim.org/entry/607070	Zinc finger MYND-type containing 10 (Zmynd10).
104395	CG8207	CG8207	Negative		-	Negative		-	Negative		http://flybase.org/reports/FBgn0034035.html	http://www.omim.org/entry/615495
106955	CG8987	tam	Negative		-	Negative		-	Negative		http://flybase.org/reports/FBgn0004406.html	http://www.omim.org/entry/174763	tamas (tam).
104771	CG31973	Cda5	Negative		-	Negative		-	Negative		http://flybase.org/reports/FBgn0051973.html	http://www.omim.org/entry/615692	Chitin deacetylase-like 5 (Cda5).
110191	CG3402	CG3402	Negative		-	Negative		-	Negative		http://flybase.org/reports/FBgn0035148.html	http://www.omim.org/entry/616484
100513	CG30488	antr	Negative		-	Negative		-	Negative		http://flybase.org/reports/FBgn0050488.html	http://www.omim.org/entry/612434	antares (antr).
108387	CG15715	CG15715	Negative		-	Negative		-	Negative		http://flybase.org/reports/FBgn0036538.html		Human zinc finger protein 706 (ZNF706) ortholog. HGNC:24992.
104362	CG12389	Fpps	Negative		-	Negative		-	Negative		http://flybase.org/reports/FBgn0025373.html	http://www.omim.org/entry/134629	Farnesyl pyrophosphate synthase (Fpps).
104439	CG8332	RpS15	Negative		-	Negative		-	Negative		http://flybase.org/reports/FBgn0034138.html	http://www.omim.org/entry/180535	Ribosomal protein S15 (RpS15).
108456	CG11761	trsn	Negative		-	Negative		-	Negative		http://flybase.org/reports/FBgn0033528.html	http://www.omim.org/entry/600575	translin (trsn).
104437	CG32446	Atox1	Negative		-	Negative		-	Negative		http://flybase.org/reports/FBgn0052446.html	http://www.omim.org/entry/602270	Antioxidant 1 copper chaperone (Atox1).
105364	CG11403	CG11403	Negative		-	Negative		-	Negative		http://flybase.org/reports/FBgn0026876.html	http://www.omim.org/entry/601150
100397	CG10801	CG10801	Negative		-	Negative		-	Negative		http://flybase.org/reports/FBgn0029660.html		No human ortholog.
104412	CG4207	bonsai	Negative		-	Negative		-	Negative		http://flybase.org/reports/FBgn0026261.html	http://www.omim.org/entry/611979	bonsai (bonsai).
106971	CG7392	Cka	Negative		-	Negative		-	Negative		http://flybase.org/reports/FBgn0044323.html	http://www.omim.org/entry/614766	Connector of kinase to AP-1 (Cka).
108439	CG5809	CaBP1	Negative		-	Negative		-	Negative		http://flybase.org/reports/FBgn0025678.html	http://www.omim.org/entry/611099	calcium-binding protein 1 (CaBP1).
108005	CG33103	Ppn	Negative		-	Negative		-	Negative		http://flybase.org/reports/FBgn0003137.html		Papilin (Ppn). Human papilin, proteoglycan like sulfated glycoprotein (PAPLN) ortholog. HGNC:19262.
104361	CG7055	Bap111	Negative		-	Negative		-	Negative		http://flybase.org/reports/FBgn0030093.html	http://www.omim.org/entry/603111	Brahma associated protein 111kD (Bap111).
104417	CG1404	Ran	Negative		-	Negative		-	Negative		http://flybase.org/reports/FBgn0020255.html	http://www.omim.org/entry/601179	Ran (Ran).
104386	CG11121	so	Negative		-	Negative		-	Negative		http://flybase.org/reports/FBgn0003460.html	http://www.omim.org/entry/601205	sine oculis (so).
109300	CG11325	AkhR	Negative		-	Negative		-	Negative		http://flybase.org/reports/FBgn0025595.html	http://www.omim.org/entry/138850	Adipokinetic hormone receptor (AkhR).
104359	CG11586	CG11586	Negative		-	Negative		-	Negative		http://flybase.org/reports/FBgn0035520.html		Human zinc finger matrin-type 2 (ZMAT2) ortholog. HGNC:26433.
105378	CG6279	CG6279	Negative		-	Negative		-	Negative		http://flybase.org/reports/FBgn0036125.html	http://www.omim.org/entry/612025
110216	CG3180	RpII140	Negative		-	Negative		-	Negative		http://flybase.org/reports/FBgn0262955.html	http://www.omim.org/entry/180661	RNA polymerase II 140kD subunit (RpII140).
108511	CG3258	ase	Negative		-	Negative		-	Negative		http://flybase.org/reports/FBgn0000137.html	http://www.omim.org/entry/100790	asense (ase).
109509	CG2964	CG2964	Negative		-	Negative		-	Negative		http://flybase.org/reports/FBgn0031462.html	http://www.omim.org/entry/609712
104405	CG3948	zetaCop	Negative		-	Negative		-	Negative		http://flybase.org/reports/FBgn0040512.html	http://www.omim.org/entry/615472
104381	CG2655	HLH3B	Negative		-	Negative		-	Negative		http://flybase.org/reports/FBgn0011276.html	http://www.omim.org/entry/186855	Helix loop helix protein 3B (HLH3B).
108441	CG32721	NELF-b	Negative		-	Negative		-	Negative		http://flybase.org/reports/FBgn0027553.html	http://www.omim.org/entry/611180	NELF-B (NELF-B).
109309	CG4673	Npl4	Negative		-	Negative		-	Negative		http://flybase.org/reports/FBgn0039348.html	http://www.omim.org/entry/606590	Nuclear protein localization 4 (Npl4).
104349	CG5941	CG5941	Negative		-	Negative		-	Negative		http://flybase.org/reports/FBgn0029833.html	http://omim.org/entry/300587
108013	CG6413	Dis3	Negative		-	Negative		-	Negative		http://flybase.org/reports/FBgn0039183.html	http://www.omim.org/entry/607533	Dis3 (Dis3).
106972	CG10881	eIF3gb	Negative		-	Negative		-	Negative		http://flybase.org/reports/FBgn0038796.html	http://www.omim.org/entry/603913	eIF3g paralogue b (eIF3gb).
109409	CG6027	cdi	Negative		-	Negative		-	Negative		http://flybase.org/reports/FBgn0004876.html	http://www.omim.org/entry/604746	center divider (cdi).
107027	CG10932	CG10932	Negative		-	Negative		-	Negative		http://flybase.org/reports/FBgn0029969.html	http://www.omim.org/entry/607809
109311	CG10672	CG10672	Negative		-	Negative		-	Negative		http://flybase.org/reports/FBgn0035588.html	http://www.omim.org/entry/611596
105488	CG6764	RpL24-like	Negative		-	Negative		-	Negative		http://flybase.org/reports/FBgn0037899.html	http://www.omim.org/entry/613262	Ribosomal protein L24-like (RpL24-like).
108033	CG13022	CG13022	Negative		-	Negative		-	Negative		http://flybase.org/reports/FBgn0036679.html		No human ortholog.
104415	CG1354	CG1354	Negative		-	Negative		-	Negative		http://flybase.org/reports/FBgn0030151.html	http://www.omim.org/entry/611175
100422	CG15732	Ir11a	Negative		-	Negative		-	Negative		http://flybase.org/reports/FBgn0030385.html	http://www.omim.org/entry/610659	Ionotropic receptor 11a (Ir11a).
104407	CG18104	arg	Negative		-	Negative		-	Negative		http://flybase.org/reports/FBgn0023535.html	http://www.omim.org/entry/608313	arginase (arg).
102357	CG4920	ea	Negative		-	Negative		-	Negative		http://flybase.org/reports/FBgn0000533.html	http://www.omim.org/entry/147910	easter (ea). Low DIOPT score.
100560	CG2194	su(r)	Negative		-	Negative		-	Negative		http://flybase.org/reports/FBgn0086450.html	http://www.omim.org/entry/612779	suppressor of rudimentary (su(r)).
100581	CG13379	Sgf11	Negative		-	Negative		-	Negative		http://flybase.org/reports/FBgn0036804.html		SAGA associated factor 11kDa (Sgf11). Human ataxin 7 like 3 (ATXN7L3) ortholog. HGNC:25416.
101160	CG14323	CG14323	Negative		-	Negative		-	Negative		http://flybase.org/reports/FBgn0038529.html		No human ortholog.
109650	CG7144	LKRSDH	Negative		-	Negative		-	Negative		http://flybase.org/reports/FBgn0025687.html	http://www.omim.org/entry/605113	Lysine ketoglutarate reductase/saccharopine dehydrogenase (LKRSDH).
100537	CG6794	Dif	Negative		-	Negative		-	Negative		http://flybase.org/reports/FBgn0011274.html	http://www.omim.org/entry/604758	Dorsal-like immunity factor (Dif).
104434	CG32177	Ndfip	Negative		-	Negative		-	Negative		http://flybase.org/reports/FBgn0052177.html	http://www.omim.org/entry/612050	Nedd4 family interacting protein (Ndfip).
101139	CG10090	Tim17a1	Negative		-	Negative		-	Negative		http://flybase.org/reports/FBgn0038018.html	http://www.omim.org/entry/300249	Tim17a1 (Tim17a1).
100929	CG13898	CG13898	Negative		-	Negative		-	Negative		http://flybase.org/reports/FBgn0035161.html	http://www.omim.org/entry/607315
100551	CG8750	CG8750	Negative		-	Negative		-	Negative		http://flybase.org/reports/FBgn0040812.html		No human ortholog.
100589	CG14883	CG14883	Negative		-	Negative		-	Negative		http://flybase.org/reports/FBgn0038432.html	http://www.omim.org/entry/605943
101266	CG11313	CG11313	Negative		-	Negative		-	Negative		http://flybase.org/reports/FBgn0039798.html	http://www.omim.org/entry/147910	Low DIOPT score.
100584	CG4545	SerT	Negative		-	Negative		-	Negative		http://flybase.org/reports/FBgn0010414.html	http://www.omim.org/entry/182138	Serotonin transporter (SerT).
100555	CG4405	jp	Negative		-	Negative		-	Negative		http://flybase.org/reports/FBgn0032129.html	http://www.omim.org/entry/605266	junctophilin (jp).
100627	CG6762	CG6762	Negative		-	Negative		-	Negative		http://flybase.org/reports/FBgn0030876.html		Human sulfiredoxin 1 (SRXN1). ortholog. HGNC:16132.
100549	CG2278	CG2278	Negative		-	Negative		-	Negative		http://flybase.org/reports/FBgn0030017.html		No human ortholog.
100930	CG6868	tld	Negative		-	Negative		-	Negative		http://flybase.org/reports/FBgn0003719.html	http://www.omim.org/entry/606742	tolloid (tld).
100957	CG5559	Sytalpha	Negative		-	Negative		-	Negative		http://flybase.org/reports/FBgn0261089.html	http://www.omim.org/entry/613528	Synaptotagmin alpha (Sytalpha).
101058	CG7293	Klp68D	Negative		-	Negative		-	Negative		http://flybase.org/reports/FBgn0004381.html	http://www.omim.org/entry/603754	Kinesin-like protein at 68D (Klp68D).
104428	CG4899	Pdh	Negative		-	Negative		-	Negative		http://flybase.org/reports/FBgn0011693.html	http://www.omim.org/entry/601688	Photoreceptor dehydrogenase (Pdh).
110463	CG8677	CG8677	Negative		-	Negative		-	Negative		http://flybase.org/reports/FBgn0026577.html	http://www.omim.org/entry/608522
101158	CG14569	CG14569	Negative		-	Negative		-	Negative		http://flybase.org/reports/FBgn0037123.html		No human ortholog.
100939	CG12290	CG12290	Negative		-	Negative		-	Negative		http://flybase.org/reports/FBgn0039419.html
101136	CG7422	Snmp2	Negative		-	Negative		-	Negative		http://flybase.org/reports/FBgn0035815.html	http://www.omim.org/entry/173510	Sensory neuron membrane protein 2 (Snmp2).
110343	CG9198	shtd	Negative		-	Negative		-	Negative		http://flybase.org/reports/FBgn0004391.html	http://www.omim.org/entry/608473	shattered (shtd).
101262	CG32246	CG32246	Negative		-	Negative		-	Negative		http://flybase.org/reports/FBgn0052246.html	http://www.omim.org/entry/610115
101269	CG14131	CG14131	Negative		-	Negative		-	Negative		http://flybase.org/reports/FBgn0036205.html		No human ortholog.
101276	CG13310	CG13310	Negative		-	Negative		-	Negative		http://flybase.org/reports/FBgn0035928.html		No human ortholog.
101157	CG2291	CG2291	Negative		-	Negative		-	Negative		http://flybase.org/reports/FBgn0033279.html		No human ortholog.
110718	CG2691	CG2691	Negative		-	Negative		-	Negative		http://flybase.org/reports/FBgn0030504.html		Human ribosomal RNA processing 12 homolog (RRP12) ortholog. HGNC:29100.
101083	CG3897	blot	Negative		-	Negative		-	Negative		http://flybase.org/reports/FBgn0027660.html	http://www.omim.org/entry/300036	bloated tubules (blot). Low DIOPT score.
109816	CG3621	ND-B14.5A	Negative		-	Negative		-	Negative		http://flybase.org/reports/FBgn0025839.html	http://www.omim.org/entry/602139	NADH:ubiquinone oxidoreductase B14.5A subunit (ND-B14.5A).
104978	CG5442	SC35	Negative		-	Negative		-	Negative		http://flybase.org/reports/FBgn0265298.html	http://www.omim.org/entry/600813	SR family splicing factor SC35 (SC35).
105252	CG32239	RhoGEF64C	Negative		-	Negative		-	Negative		http://flybase.org/reports/FBgn0035574.html	http://www.omim.org/entry/612115	Rho guanine nucleotide exchange factor at 64C (RhoGEF64C).
103143	CG2674	Sam-S	Negative		-	Negative		-	Negative		http://flybase.org/reports/FBgn0005278.html	http://www.omim.org/entry/601468	S-adenosylmethionine Synthetase (Sam-S).
100539	CG18467	CG18467	Negative		-	Negative		-	Negative		http://flybase.org/reports/FBgn0034218.html	http://www.omim.org/entry/611625
101115	CG9918	PK1-R	Negative		-	Negative		-	Negative		http://flybase.org/reports/FBgn0038201.html	http://www.omim.org/entry/604153	pyrokinin-1 receptor (PK1-R).
100590	CG31650	CG31650	Negative		-	Negative		-	Negative		http://flybase.org/reports/FBgn0031673.html	http://www.omim.org/entry/602584
101175	CG31247	tinc	Negative		-	Negative		-	Negative		http://flybase.org/reports/FBgn0261649.html		tincar (tinc). No human ortholog.
110350	CG6637	lsn	Negative		-	Negative		-	Negative		http://flybase.org/reports/FBgn0260940.html	http://www.omim.org/entry/610904	larsen (lsn).
101098	CG8913	Irc	Negative		-	Negative		-	Negative		http://flybase.org/reports/FBgn0038465.html	http://www.omim.org/entry/600262	immune-related catalase (Irc).
110156	CG1591	REG	Negative		-	Negative		-	Negative		http://flybase.org/reports/FBgn0029133.html	http://www.omim.org/entry/605129	REG (REG).
101186	CG43366	CG43366	Negative		-	Negative		-	Negative		http://flybase.org/reports/FBgn0263109.html
101155	CG14102	CG14102	Negative		-	Negative		-	Negative		http://flybase.org/reports/FBgn0036906.html		No human ortholog.
101017	CG4711	squ	Negative		-	Negative		-	Negative		http://flybase.org/reports/FBgn0267347.html		squash (squ). No human ortholog.
109392	CG32500	CG32500	Negative		-	Negative		-	Negative		http://flybase.org/reports/FBgn0052500.html	http://www.omim.org/entry/608100
108053	CG1744	chp	Negative		-	Negative		-	Negative		http://flybase.org/reports/FBgn0267435.html		chaoptin (chp).
101248	CG7051	Dic61B	Negative		-	Negative		-	Negative		http://flybase.org/reports/FBgn0263988.html		Dynein intermediate chain at 61B (Dic61B). Human WD repeat domain 78 (WDR78) ortholog. HGNC:26252.
109403	CG5458	CG5458	Negative		-	Negative		-	Negative		http://flybase.org/reports/FBgn0032478.html	http://www.omim.org/entry/609314
101830	CG9734	glob1	Negative		-	Negative		-	Negative		http://flybase.org/reports/FBgn0027657.html	http://www.omim.org/entry/608759	globin 1 (glob1).
101619	CG2790	CG2790	Negative		-	Negative		-	Negative		http://flybase.org/reports/FBgn0027599.html	http://www.omim.org/entry/617048
101038	CG6801	vers	Negative		-	Negative		-	Negative		http://flybase.org/reports/FBgn0011335.html		versatile (vers).
102440	CG18103	Piezo	Negative		-	Negative		-	Negative		http://flybase.org/reports/FBgn0264953.html	http://www.omim.org/entry/613629	Piezo (Piezo).
107720	CG10682	vih	Negative		-	Negative		-	Negative		http://flybase.org/reports/FBgn0264848.html	http://www.omim.org/entry/605574	vihar (vih).
101453	CG1358	CG1358	Negative		-	Negative		-	Negative		http://flybase.org/reports/FBgn0033196.html	http://www.omim.org/entry/610865
110161	CG31453	pch2	Negative		-	Negative		-	Negative		http://flybase.org/reports/FBgn0051453.html	http://www.omim.org/entry/604507	pachytene checkpoint 2 (pch2).
103302	CG42797	CG42797	Negative		-	Negative		-	Negative		http://flybase.org/reports/FBgn0261931.html	http://www.omim.org/entry/617245
110750	CG9210	Ac13E	Negative		-	Negative		-	Negative		http://flybase.org/reports/FBgn0022710.html	http://www.omim.org/entry/603302	Adenylyl cyclase 13E (Ac13E).
100936	CG12945	CG12945	Negative		-	Negative		-	Negative		http://flybase.org/reports/FBgn0037755.html		No human ortholog.
105978	CG9854	hrg	Negative		-	Negative		-	Negative		http://flybase.org/reports/FBgn0015949.html	http://www.omim.org/entry/616865	hiiragi (hrg).
102605	CG17734	CG17734	Negative		-	Negative		-	Negative		http://flybase.org/reports/FBgn0037890.html		Human HIG1 hypoxia inducible domain family member 1A (HIGD1A) ortholog. HGNC:29527.
101832	CG13062	CG13062	Negative		-	Negative		-	Negative		http://flybase.org/reports/FBgn0036603.html		No human ortholog.
109425	CG4111	RpL35	Negative		-	Negative		-	Negative		http://flybase.org/reports/FBgn0029785.html		Ribosomal protein L35 (RpL35). Human ribosomal protein L35 (RPL35) ortholog. HGNC:10344.
105658	CG2720	Hop	Negative		-	Negative		-	Negative		http://flybase.org/reports/FBgn0024352.html	http://www.omim.org/entry/605063	Hsp70/Hsp90 organizing protein homolog (Hop).
106977	CG11188	Aatf	Negative		-	Negative		-	Negative		http://flybase.org/reports/FBgn0031851.html	http://www.omim.org/entry/608463	Apoptosis antagonizing transcription factor (Aatf).
109451	CG8726	CG8726	Negative		-	Negative		-	Negative		http://flybase.org/reports/FBgn0033244.html	http://www.omim.org/entry/611450
107930	CG15423	CG15423	Negative		-	Negative		-	Negative		http://flybase.org/reports/FBgn0031580.html		No human ortholog.
107815	CG16983	SkpA	Negative		-	Negative		-	Negative		http://flybase.org/reports/FBgn0025637.html	http://www.omim.org/entry/601434	SKP1-related A (SkpA).
107386	CG8402	PpD3	Negative		-	Negative		-	Negative		http://flybase.org/reports/FBgn0005777.html	http://www.omim.org/entry/600658	Protein phosphatase D3 (PpD3).
106130	CG5363	Cdk1	Negative		-	Negative		-	Negative		http://flybase.org/reports/FBgn0004106.html	http://www.omim.org/entry/116940	Cyclin-dependent kinase 1 (Cdk1).
106857	CG33225	CG33225	Negative		-	Negative		-	Negative		http://flybase.org/reports/FBgn0053225.html		No human ortholog.
109439	CG8891	CG8891	Negative		-	Negative		-	Negative		http://flybase.org/reports/FBgn0031663.html	http://www.omim.org/entry/147520
109419	CG1381	RpLP0-like	Negative		-	Negative		-	Negative		http://flybase.org/reports/FBgn0033485.html		Ribosomal protein LP0-like (RpLP0-like). Human MRT4 homolog, ribosome maturation factor (MRTO4) ortholog. HGNC:18477.
106121	CG7441	TrpRS-m	Negative		-	Negative		-	Negative		http://flybase.org/reports/FBgn0036763.html	http://www.omim.org/entry/604733	Tryptophanyl-tRNA synthetase, mitochondrial (TrpRS-m).
108384	CG9193	CG9193	Negative		-	Negative		-	Negative		http://flybase.org/reports/FBgn0005655.html	http://www.omim.org/entry/176740	Proliferating cell nuclear antigen (PCNA).
107944	CG31517	CG31517	Negative		-	Negative		-	Negative		http://flybase.org/reports/FBgn0047199.html		No human ortholog.
106994	CG3561	Dbp21E2	Negative		-	Negative		-	Negative		http://flybase.org/reports/FBgn0086130.html	http://www.omim.org/entry/607618	DEAD box protein 21E2 (Dbp21E2).
105967	CG5824	l(3)07882	Negative		-	Negative		-	Negative		http://flybase.org/reports/FBgn0010926.html	http://www.omim.org/entry/611526	lethal (3) 07882 (l(3)07882).
103419	CG1017	Mfap1	Negative		-	Negative		-	Negative		http://flybase.org/reports/FBgn0035294.html	http://www.omim.org/entry/600215	Microfibril-associated protein 1 (Mfap1).
109323	CG31902	Spn28Da	Negative		-	Negative		-	Negative		http://flybase.org/reports/FBgn0051902.html	http://www.omim.org/entry/600518	Serpin 28Da (Spn28Da).
106129	CG5033	CG5033	Negative		-	Negative		-	Negative		http://flybase.org/reports/FBgn0028744.html	http://www.omim.org/entry/610596
110201	CG3822	CG3822	Negative		-	Negative		-	Negative		http://flybase.org/reports/FBgn0038837.html	http://www.omim.org/entry/138245
109314	CG12251	AQP	Negative		-	Negative		-	Negative		http://flybase.org/reports/FBgn0033807.html		aquaporin (AQP). Human aquaporin 12B (AQP12B) ortholog. HGNC:6096.
106949	CG15741	CG15741	Negative		-	Negative		-	Negative		http://flybase.org/reports/FBgn0030338.html		No human ortholog.
109420	CG8416	Rho1	Negative		-	Negative		-	Negative		http://flybase.org/reports/FBgn0014020.html	http://www.omim.org/entry/165390
106962	CG8049	Btk29A	Negative		-	Negative		-	Negative		http://flybase.org/reports/FBgn0003502.html	http://www.omim.org/entry/600583	Btk family kinase at 29A (Btk29A).
105973	CG5289	Rpt2	Negative		-	Negative		-	Negative		http://flybase.org/reports/FBgn0015282.html	http://www.omim.org/entry/602706	Regulatory particle triple-A ATPase 2 (Rpt2).
109553	CG34085	mt:ND4	Negative		-	Negative		-	Negative		http://flybase.org/reports/FBgn0262952.html	http://www.omim.org/entry/516003	mitochondrial NADH-ubiquinone oxidoreductase chain 4 (mt:ND4).
109500	CG9107	CG9107	Negative		-	Negative		-	Negative		http://flybase.org/reports/FBgn0031764.html		Human ribosomal RNA processing 7 homolog A (RRP7A) ortholog. HGNC:24286.
109447	CG3195	RpL12	Negative		-	Negative		-	Negative		http://flybase.org/reports/FBgn0034968.html	http://www.omim.org/entry/180475	Ribosomal protein L12 (RpL12).
109486	CG3540	Cyp4d14	Negative		-	Negative		-	Negative		http://flybase.org/reports/FBgn0023541.html	http://www.omim.org/entry/608614	Cyp4d14 (Cyp4d14).
105639	CG3605	CG3605	Negative		-	Negative		-	Negative		http://flybase.org/reports/FBgn0031493.html	http://www.omim.org/entry/605591
107474	CG31806	CG31806	Negative		-	Negative		-	Negative		http://flybase.org/reports/FBgn0051806.html		No human ortholog.
108745	CG3192	ND-ASHI	Negative		-	Negative		-	Negative		http://flybase.org/reports/FBgn0029888.html	http://www.omim.org/entry/602140	NADH dehydrogenase (ubiquinone) ASHI subunit (ND-ASHI).
102150	CG13955	CG13955	Negative		-	Negative		-	Negative		http://flybase.org/reports/FBgn0033412.html		No human ortholog.
105852	CG8815	Sin3A	Negative		-	Negative		-	Negative		http://flybase.org/reports/FBgn0022764.html	http://www.omim.org/entry/607776	Sin3A (Sin3A).
104958	CG3871	Six4	Negative		-	Negative		-	Negative		http://flybase.org/reports/FBgn0027364.html	http://www.omim.org/entry/600963	Six4 (Six4).
104367	CG5677	Spase 22-23	Negative		-	Negative		-	Negative		http://flybase.org/reports/FBgn0039172.html		Spase 22/23-subunit (Spase22-23). Human signal peptidase complex subunit 3 (SPCS3) ortholog. HGNC:26212.
104018	CG8674	l(2)k14505	Negative		-	Negative		-	Negative		http://flybase.org/reports/FBgn0021856.html	http://www.omim.org/entry/608918	lethal (2) k14505 (l(2)k14505).
109782	CG10840	eIF5B	Negative		-	Negative		-	Negative		http://flybase.org/reports/FBgn0026259.html	http://www.omim.org/entry/606086
104493	CG17680	CG17680	Negative		-	Negative		-	Negative		http://flybase.org/reports/FBgn0062440.html	http://www.omim.org/entry/615588
105669	CG3539	Slh	Negative		-	Negative		-	Negative		http://flybase.org/reports/FBgn0264978.html		SLY-1 homologous (Slh). Human sec1 family domain containing 1 (SCFD1) ortholog. HGNC:20726.
109341	CG3656	Cyp4d1	Negative		-	Negative		-	Negative		http://flybase.org/reports/FBgn0005670.html	http://www.omim.org/entry/614999	Cytochrome P450-4d1 (Cyp4d1).
109301	CG12325	CG12325	Negative		-	Negative		-	Negative		http://flybase.org/reports/FBgn0033557.html	http://www.omim.org/entry/601475
102301	CG8871	Jon25Biii	Negative		-	Negative		-	Negative		http://flybase.org/reports/FBgn0031653.html		Jonah 25Biii (Jon25Biii).
107120	CG30002	CG30002	Negative		-	Negative		-	Negative		http://flybase.org/reports/FBgn0260474.html		No human ortholog.
103390	CG7057	AP-2mu	Negative		-	Negative		-	Negative		http://flybase.org/reports/FBgn0263351.html	http://www.omim.org/entry/601024	Adaptor Protein complex 2, mu subunit (AP-2mu).
109495	CG32676	stx	Negative		-	Negative		-	Negative		http://flybase.org/reports/FBgn0052676.html	http://www.omim.org/entry/606700	stuxnet (stx).
103400	CG12367	Hen1	Negative		-	Positive		No	Negative		http://flybase.org/reports/FBgn0033686.html	http://www.omim.org/entry/612178	Hen1 (Hen1).
106664	CG31475	CG31475	Negative		-	Negative		-	Negative		http://flybase.org/reports/FBgn0051475.html	http://www.omim.org/entry/614282
106984	CG30122	CG30122	Negative		-	Negative		-	Negative		http://flybase.org/reports/FBgn0050122.html	http://www.omim.org/entry/605800
104956	CG16704	CG16704	Negative		-	Negative		-	Negative		http://flybase.org/reports/FBgn0031558.html	http://www.omim.org/entry/605123
107934	CG5854	CG5854	Negative		-	Negative		-	Negative		http://flybase.org/reports/FBgn0039130.html
109436	CG2910	nito	Negative		-	Negative		-	Negative		http://flybase.org/reports/FBgn0027548.html	http://www.omim.org/entry/612602	spenito (nito)
105655	CG5290	CG5290	Negative		-	Positive		No	Negative		http://flybase.org/reports/FBgn0036772.html		Human tetratricopeptide repeat domain 27 (TTC27) ortholog. HGNC:25986.
104976	CG30184	CG30184	Negative		-	Negative		-	Negative		http://flybase.org/reports/FBgn0050184.html
104013	CG3322	LanB2	Negative		-	Negative		-	Negative		http://flybase.org/reports/FBgn0267348.html	http://www.omim.org/entry/150290	Laminin B2 (LanB2).
106138	CG2656	CG2656	Negative		-	Negative		-	Negative		http://flybase.org/reports/FBgn0037478.html		Human GPN-loop GTPase 3 (GPN3) ortholog. HGNC:30186.
110644	CG5201	Dad	Negative		-	Negative		-	Negative		http://flybase.org/reports/FBgn0020493.html	http://www.omim.org/entry/602932	Daughters against dpp (Dad).
110211	CG3226	CG3226	Negative		-	Negative		-	Negative		http://flybase.org/reports/FBgn0029882.html	http://www.omim.org/entry/606186
105185	CG34357	CG34357	Negative		-	Negative		-	Negative		http://flybase.org/reports/FBgn0085386.html	http://www.omim.org/entry/600179
100490	CG18547	CG18547	Negative		-	Negative		-	Negative		http://flybase.org/reports/FBgn0037973.html	http://www.omim.org/entry/601142
100757	CG1751	Rab21	Negative		-	Negative		-	Negative		http://flybase.org/reports/FBgn0030306.html		Rab21 (Rab21). Human signal peptidase complex subunit 2 (SPCS2) ortholog. HGNC:28962.
100781	CG31646	DIP-theta	Negative		-	Negative		-	Negative		http://flybase.org/reports/FBgn0051646.html	http://www.omim.org/entry/600632	DIP-theta (DIP-theta).
105128	CG3425	T3dh	Negative		-	Negative		-	Negative		http://flybase.org/reports/FBgn0017482.html	http://www.omim.org/entry/611083	Type III alcohol dehydrogenase (T3dh).
105125	CG3433	Coprox	Negative		-	Negative		-	Negative		http://flybase.org/reports/FBgn0021944.html	http://www.omim.org/entry/612732	Coproporphyrinogen oxidase (Coprox).
101316	CG4994	Mpcp	Negative		-	Negative		-	Negative		http://flybase.org/reports/FBgn0026409.html	http://www.omim.org/entry/600370	Mitochondrial phosphate carrier protein (Mpcp).
106576	CG34171	CG34171	Negative		-	Negative		-	Negative		http://flybase.org/reports/FBgn0085200.html
100572	CG10415	TfIIEalpha	Negative		-	Negative		-	Negative		http://flybase.org/reports/FBgn0015828.html	http://www.omim.org/entry/189962	Transcription factor IIE alpha (TfIIEalpha).
100609	CG3411	bs	Negative		-	Negative		-	Negative		http://flybase.org/reports/FBgn0004101.html	http://www.omim.org/entry/600589	blistered (bs).
102633	CG8914	CkIIbeta2	Negative		-	Negative		-	Negative		http://flybase.org/reports/FBgn0026136.html	http://www.omim.org/entry/115441	Casein kinase II beta2 subunit (CkIIbeta2).
100585	CG9282	RpL24	Negative		-	Negative		-	Negative		http://flybase.org/reports/FBgn0032518.html	http://www.omim.org/entry/604180	Ribosomal protein L24 (RpL24).
106155	CG10325	abd-A	Negative		-	Negative		-	Negative		http://flybase.org/reports/FBgn0000014.html	http://www.omim.org/entry/142951	abdominal A (abd-A).
100565	CG7664	crp	Negative		-	Negative		-	Negative		http://flybase.org/reports/FBgn0001994.html	http://www.omim.org/entry/600743	cropped (crp).
100452	CG11839	CG11839	Negative		-	Negative		-	Negative		http://flybase.org/reports/FBgn0039271.html		Human zinc finger protein 830 (ZNF830) ortholog. HGNC:28291.
110207	CG5263	smg	Negative		-	Negative		-	Negative		http://flybase.org/reports/FBgn0016070.html	http://www.omim.org/entry/610747	smaug (smg).
108616	CG14516	CG14516	Negative		-	Negative		-	Negative		http://flybase.org/reports/FBgn0039640.html	http://www.omim.org/entry/151530
105512	CG7588	Eig71Ej	Negative		-	Negative		-	Negative		http://flybase.org/reports/FBgn0014850.html		Eig71Ej (Eig71Ej). No human ortholog.
105866	CG18369	S-Lap5	Negative		-	Negative		-	Negative		http://flybase.org/reports/FBgn0033860.html	http://www.omim.org/entry/170250	Sperm-Leucylaminopeptidase 5 (S-Lap5).
101308	CG7038	mRpL30	Negative		-	Negative		-	Negative		http://flybase.org/reports/FBgn0029718.html	http://www.omim.org/entry/611838	mitochondrial ribosomal protein L30 (mRpL30).
109369	CG6905	Cdc5	Negative		-	Negative		-	Negative		http://flybase.org/reports/FBgn0265574.html	http://www.omim.org/entry/602868	Cell division cycle 5 (Cdc5).
101310	CG10635	Pfdn4	Negative		-	Negative		-	Negative		http://flybase.org/reports/FBgn0035603.html	http://www.omim.org/entry/604898	Prefoldin 4 (Pfdn4).
101343	CG5641	CG5641	Negative		-	Negative		-	Negative		http://flybase.org/reports/FBgn0038046.html	http://www.omim.org/entry/603181
105644	CG7747	CG7747	Negative		-	Negative		-	Negative		http://flybase.org/reports/FBgn0034109.html	http://www.omim.org/entry/607588
100550	CG8374	dmt	Negative		-	Negative		-	Negative		http://flybase.org/reports/FBgn0016792.html		dalmatian (dmt). No human ortholog.
110430	CG12314	zuc	Negative		-	Negative		-	Negative		http://flybase.org/reports/FBgn0261266.html	http://www.omim.org/entry/614960	zucchini (zuc).
101545	CG7892	nmo	Negative		-	Negative		-	Negative		http://flybase.org/reports/FBgn0011817.html	http://www.omim.org/entry/609476	nemo (nmo).
103905	CG8258	CG8258	Negative		-	Negative		-	Positive		http://flybase.org/reports/FBgn0033342.html	https://www.omim.org/entry/617786	Human chaperonin containing TCP1 subunit 8 (CCT8) ortholog. HGNC:1623.
105400	CG12891	whd	Negative		-	Negative		-	Negative		http://flybase.org/reports/FBgn0261862.html	http://www.omim.org/entry/600528	withered (whd).
106580	CG34200	CG34200	Negative		-	Negative		-	Negative		http://flybase.org/reports/FBgn0085229.html		No human ortholog.
100496	CG5012	mRpL12	Negative		-	Negative		-	Negative		http://flybase.org/reports/FBgn0011787.html	http://www.omim.org/entry/602375	mitochondrial ribosomal protein L12 (mRpL12).
105409	CG5343	Bug22	Negative		-	Negative		-	Negative		http://flybase.org/reports/FBgn0032248.html		Basal body up regulated gene 22 (Bug22). Human cilia and flagella associated protein 20 (CFAP20) ortholog.
102456	CG9265	CG9265	Negative		-	Negative		-	Negative		http://flybase.org/reports/FBgn0032910.html	http://www.omim.org/entry/608989
106493	CG31322	MetRS-m	Negative		-	Negative		-	Negative		http://flybase.org/reports/FBgn0027083.html	http://www.omim.org/entry/609728	Methionyl-tRNA synthetase, mitochondrial (MetRS-m).
100816	CG32174	CG32174	Negative		-	Negative		-	Negative		http://flybase.org/reports/FBgn0052174.html	http://www.omim.org/entry/612898
100485	CG10435	CG10435	Negative		-	Negative		-	Negative		http://flybase.org/reports/FBgn0037539.html	http://www.omim.org/entry/609787
100818	CG4169	UQCR-C2	Negative		-	Negative		-	Negative		http://flybase.org/reports/FBgn0250814.html	http://www.omim.org/entry/191329	Ubiquinol-cytochrome c reductase core protein 2 (UQCR-C2).
100844	CG14958	CG14958	Negative		-	Negative		-	Negative		http://flybase.org/reports/FBgn0035413.html		No human ortholog.
100552	CG13976	Gr98a	Negative		-	Negative		-	Negative		http://flybase.org/reports/FBgn0039520.html		Gustatory receptor 98a (Gr98a). No human ortholog.
100577	CG5796	Ppox	Negative		-	Negative		-	Negative		http://flybase.org/reports/FBgn0020018.html	http://www.omim.org/entry/600923	Protoporphyrinogen oxidase (Ppox).
100673	CG18516	AOX4	Negative		-	Negative		-	Negative		http://flybase.org/reports/FBgn0038350.html		Aldehyde oxidase 4 (AOX4).
101355	CG7945	CG7945	Negative		-	Negative		-	Negative		http://flybase.org/reports/FBgn0036505.html	http://www.omim.org/entry/603882
100700	CG4746	mab-21	Negative		-	Negative		-	Negative		http://flybase.org/reports/FBgn0029003.html	http://www.omim.org/entry/601280	mab-21 (mab-21).
102381	CG8695	Mal-A3	Negative		-	Negative		-	Negative		http://flybase.org/reports/FBgn0002571.html	http://www.omim.org/entry/104614	Maltase A3 (Mal-A3).
100580	CG2843	Cwc25	Negative		-	Negative		-	Negative		http://flybase.org/reports/FBgn0031452.html		Cwc25 (Cwc25 ). Human CWC25 spliceosome associated protein homolog (CWC25) ortholog. HGNC:25989.
102398	CG15717	CG15717	Negative		-	Negative		-	Negative		http://flybase.org/reports/FBgn0030451.html		No human ortholog.
103337	CG3288	CG3288	Negative		-	Negative		-	Negative		http://flybase.org/reports/FBgn0037030.html		No human ortholog.
105883	CG1987	Rbp1-like	Negative		-	Negative		-	Negative		http://flybase.org/reports/FBgn0030479.html	http://www.omim.org/entry/603364	Rbp1-like (Rbp1-like).
100811	CG18412	ph-p	Negative		-	Negative		-	Negative		http://flybase.org/reports/FBgn0004861.html		polyhomeotic proximal (ph-p). Human polyhomeotic homolog 3 (PHC3) ortholog. HGNC:15682
102401	CG6730	Cyp4d21	Negative		-	Negative		-	Negative		http://flybase.org/reports/FBgn0031925.html	http://www.omim.org/entry/608614	Cyp4d21 (Cyp4d21).
105383	CG6721	RasGAP1	Negative		-	Positive		No	Negative		http://flybase.org/reports/FBgn0004390.html	http://www.omim.org/entry/605182	Ras GTPase activating protein 1 (RasGAP1).
100430	CG31709	CG31709	Negative		-	Negative		-	Negative		http://flybase.org/reports/FBgn0051709.html		No human ortholog.
105371	CG17437	wds	Negative		-	Negative		-	Negative		http://flybase.org/reports/FBgn0040066.html	http://www.omim.org/entry/609012	will die slowly (wds).
105428	CG7261	TBCD	Negative		-	Negative		-	Negative		http://flybase.org/reports/FBgn0027509.html		tubulin folding cofactor D (TBCD).
102597	CG34354	CG34354	Negative		-	Negative		-	Negative		http://flybase.org/reports/FBgn0085383.html	http://www.omim.org/entry/603518
102479	CG12479	CG12479	Negative		-	Negative		-	Negative		http://flybase.org/reports/FBgn0040871.html	http://www.omim.org/entry/616574
100732	CG12749	Hrb87F	Negative		-	Negative		-	Negative		http://flybase.org/reports/FBgn0004237.html	http://www.omim.org/entry/600124	Heterogeneous nuclear ribonucleoprotein at 87F (Hrb87F).
103457	CG11516	Ptp99A	Negative		-	Negative		-	Negative		http://flybase.org/reports/FBgn0004369.html	http://www.omim.org/entry/176886	Protein tyrosine phosphatase 99A (Ptp99A).
105870	CG8681	clumsy	Negative		-	Negative		-	Negative		http://flybase.org/reports/FBgn0026255.html	http://www.omim.org/entry/138245	clumsy (clumsy).
101640	CG42347	sqa	Negative		-	Negative		-	Negative		http://flybase.org/reports/FBgn0259678.html	http://www.omim.org/entry/612147	spaghetti-squash activator (sqa).
105943	CG13880	mRpL17	Negative		-	Negative		-	Negative		http://flybase.org/reports/FBgn0035122.html	http://www.omim.org/entry/611830	mitochondrial ribosomal protein L17 (mRpL17).
100475	CG18111	Obp99a	Negative		-	Negative		-	Negative		http://flybase.org/reports/FBgn0039678.html		Odorant-binding protein 99a (Obp99a). No human ortholog.
100626	CG12659	CG12659	Negative		-	Negative		-	Negative		http://flybase.org/reports/FBgn0040929.html		Human INO80 complex subunit C (INO80C) ortholog. HGNC:26994.
100480	CG12350	lambdaTry	Negative		-	Negative		-	Negative		http://flybase.org/reports/FBgn0043470.html		lambdaTry (lambdaTry).
106666	CG3006	Fmo-1	Negative		-	Negative		-	Negative		http://flybase.org/reports/FBgn0034943.html	http://www.omim.org/entry/603957	Flavin-containing monooxygenase 1 (Fmo-1).
110204	CG3938	CycE	Negative		-	Negative		-	Negative		http://flybase.org/reports/FBgn0010382.html	http://www.omim.org/entry/123837	Cyclin E (CycE).
100454	CG13227	CG13227	Negative		-	Negative		-	Negative		http://flybase.org/reports/FBgn0033589.html		No human ortholog.
100529	CG18468	Lhr	Negative		-	Negative		-	Negative		http://flybase.org/reports/FBgn0034217.html		Lethal hybrid rescue (Lhr). No human ortholog.
100463	CG11977	CG11977	Negative		-	Negative		-	Negative		http://flybase.org/reports/FBgn0037650.html	http://www.omim.org/entry/612434
100566	CG6378	SPARC	Negative		-	Negative		-	Negative		http://flybase.org/reports/FBgn0026562.html	http://www.omim.org/entry/182120	Secreted protein, acidic, cysteine-rich (SPARC).
100458	CG15585	Osi1	Negative		-	Negative		-	Negative		http://flybase.org/reports/FBgn0037406.html		Osiris 1 (Osi1). No human ortholog.
100442	CG15728	CG15728	Negative		-	Negative		-	Negative		http://flybase.org/reports/FBgn0030409.html		No human ortholog.
100563	CG5422	Rox8	Negative		-	Negative		-	Negative		http://flybase.org/reports/FBgn0005649.html	http://www.omim.org/entry/603413	Rox8 (Rox8).
100558	CG17035	GXIVsPLA2	Negative		-	Negative		-	Negative		http://flybase.org/reports/FBgn0036545.html	http://www.omim.org/entry/611652	GXIVsPLA2 (GXIVsPLA2).
100478	CG14190	CG14190	Negative		-	Negative		-	Negative		http://flybase.org/reports/FBgn0030979.html		No human ortholog.
100450	CG17687	CG17687	Negative		-	Negative		-	Negative		http://flybase.org/reports/FBgn0036348.html		Human cilia and flagella associated protein 43 (CFAP43) ortholog. HGNC:26684.
100487	CG3212	Sr-CIV	Negative		-	Negative		-	Negative		http://flybase.org/reports/FBgn0031547.html		Scavenger receptor class C, type IV (Sr-CIV).
100486	CG2765	CG2765	Negative		-	Negative		-	Negative		http://flybase.org/reports/FBgn0035087.html	http://www.omim.org/entry/300961
100624	CG13521	robo1	Negative		-	Negative		-	Negative		http://flybase.org/reports/FBgn0005631.html	http://www.omim.org/entry/602431	roundabout 1 (robo1).
100420	CG32413	CG32413	Negative		-	Negative		-	Negative		http://flybase.org/reports/FBgn0052413.html	http://www.omim.org/entry/607065
100622	CG18812	CG18812	Negative		-	Negative		-	Negative		http://flybase.org/reports/FBgn0042135.html		Human ganglioside induced differentiation associated protein 2 (GDAP2) ortholog. HGNC:18010.
100439	CG13602	CG13602	Negative		-	Negative		-	Negative		http://flybase.org/reports/FBgn0264740.html	http://www.omim.org/entry/606580	Alias CG43998.
100446	CG10841	CG10841	Negative		-	Negative		-	Negative		http://flybase.org/reports/FBgn0038163.html		No human ortholog.
100495	CG9926	CG9926	Negative		-	Negative		-	Negative		http://flybase.org/reports/FBgn0038190.html		Human hepatoma derived growth factor-like 1 (HDGFL1) ortholog. HGNC:21095.
100497	CG9252	del	Negative		-	Negative		-	Negative		http://flybase.org/reports/FBgn0086251.html		deadlock (del). No human ortholog.
100505	CG5043	CG5043	Negative		-	Negative		-	Negative		http://flybase.org/reports/FBgn0032636.html		No human ortholog.
100456	CG7936	mex1	Negative		-	Negative		-	Negative		http://flybase.org/reports/FBgn0004228.html		midgut expression 1 (mex1).
100520	CG4576	S6kII	Negative		-	Negative		-	Negative		http://flybase.org/reports/FBgn0038366.html		No human ortholog.
100418	CG14410	CG14410	Negative		-	Negative		-	Negative		http://flybase.org/reports/FBgn0030583.html		No human ortholog.
100457	CG14834	CG14834	Negative		-	Negative		-	Negative		http://flybase.org/reports/FBgn0035768.html		Human ortholog.
100459	CG10248	Cyp6a8	Negative		-	Negative		-	Negative		http://flybase.org/reports/FBgn0013772.html	http://www.omim.org/entry/274180	Cytochrome P450-6a8 (Cyp6a8).
100402	CG14835	CG14835	Negative		-	Negative		-	Negative		http://flybase.org/reports/FBgn0035782.html		No human ortholog.
100429	CG10537	Rdl	Negative		-	Negative		-	Negative		http://flybase.org/reports/FBgn0004244.html		Resistant to dieldrin (Rdl). Human glycine receptor alpha 4 (GLRA4) ortholog. HGNC:31715.
100464	CG31911	Ent2	Negative		-	Negative		-	Negative		http://flybase.org/reports/FBgn0263916.html	http://www.omim.org/entry/602193	Equilibrative nucleoside transporter 2 (Ent2).
100455	CG14280	CG14280	Negative		-	Negative		-	Negative		http://flybase.org/reports/FBgn0038695.html		No human ortholog.
100498	CG15326	Ir7b	Negative		-	Negative		-	Negative		http://flybase.org/reports/FBgn0029965.html	http://www.omim.org/entry/610659	Ionotropic receptor 7b (Ir7b).
100401	CG6947	CG6947	Negative		-	Positive		No	Negative		http://flybase.org/reports/FBgn0264488.html		No human ortholog.
100404	CG2969	Atet	Negative		-	Negative		-	Negative		http://flybase.org/reports/FBgn0020762.html	http://www.omim.org/entry/607784	ABC transporter expressed in trachea (Atet).
100443	CG14892	CG14892	Negative		-	Negative		-	Negative		http://flybase.org/reports/FBgn0038447.html
100408	CG30385	CG30385	Negative		-	Negative		-	Negative		http://flybase.org/reports/FBgn0050385.html		No human ortholog.
100406	CG18765	CG18765	Negative		-	Negative		-	Negative		http://flybase.org/reports/FBgn0042110.html		No human ortholog.
100426	CG17131	tyn	Negative		-	Negative		-	Negative		http://flybase.org/reports/FBgn0029128.html		trynity (tyn). No human ortholog.
100416	CG6499	Amt	Negative		-	Positive		No	Negative		http://flybase.org/reports/FBgn0038309.html		Ammonium transporter (Amt). No human ortholog
100396	CG5565	CG5565	Negative		-	Positive		No	Negative		http://flybase.org/reports/FBgn0031335.html	http://www.omim.org/entry/306480
100431	CG6417	Oatp33Eb	Negative		-	Negative		-	Negative		http://flybase.org/reports/FBgn0032435.html	http://www.omim.org/entry/601460	Organic anion transporting polypeptide 33Eb (Oatp33Eb).
110562	CG2970	CG2970	Negative		-	Negative		-	Negative		http://flybase.org/reports/FBgn0034936.html	http://www.omim.org/entry/608292
100484	CG8474	Meics	Negative		-	Negative		-	Negative		http://flybase.org/reports/FBgn0025874.html		Meiotic central spindle (Meics).
100515	CG14109	CG14109	Negative		-	Negative		-	Negative		http://flybase.org/reports/FBgn0036364.html		No human ortholog.
100405	CG6829	Dark	Negative		-	Negative		-	Negative		http://flybase.org/reports/FBgn0263864.html	http://www.omim.org/entry/602233	Death-associated APAF1-related killer (Dark).
100512	CG12948	CG12948	Negative		-	Negative		-	Negative		http://flybase.org/reports/FBgn0037739.html		Human chromosome 14 open reading frame 119 (C14orf119) ortholog. HGNC:20270.
100489	CG13617	CG13617	Negative		-	Negative		-	Negative		http://flybase.org/reports/FBgn0039201.html	http://www.omim.org/entry/608671
100511	CG10393	amos	Negative		-	Negative		-	Negative		http://flybase.org/reports/FBgn0003270.html	http://www.omim.org/entry/609875	absent MD neurons and olfactory sensilla (amos).
100518	CG11251	CG11251	Negative		-	Negative		-	Negative		http://flybase.org/reports/FBgn0036346.html		Human fumarylacetoacetate hydrolase domain containing 2A (FAHD2A) ortholog. HGNC:24252.
100417	CG31998	CG31998	Negative		-	Negative		-	Negative		http://flybase.org/reports/FBgn0051998.html		No human ortholog.
100514	CG31193	TotX	Negative		-	Positive		No	Negative		http://flybase.org/reports/FBgn0044810.html		Turandot X (TotX). No human ortholog.
105494	CG4400	Brms1	Negative		-	Negative		-	Negative		http://flybase.org/reports/FBgn0030434.html		Brms1 (BRMS1). Human breast cancer metastasis-suppressor 1 like (BRMS1L) ortholog. HGNC:20512.
100467	CG42671	CG42671	Negative		-	Negative		-	Negative		http://flybase.org/reports/FBgn0261553.html		No human ortholog.
100438	CG15529	CG15529	Negative		-	Negative		-	Negative		http://flybase.org/reports/FBgn0039748.html	http://www.omim.org/entry/604515
100423	CG3117	CG3117	Negative		-	Negative		-	Negative		http://flybase.org/reports/FBgn0031471.html
107350	CG9432	l(2)01289	Negative		-	Negative		-	Negative		http://flybase.org/reports/FBgn0010482.html		lethal (2) 01289 (l(2)01289).
104421	CG10693	slo	Negative		-	Negative		-	Negative		http://flybase.org/reports/FBgn0003429.html	http://www.omim.org/entry/600150	slowpoke (slo).
106533	CG42310	prom	Negative		-	Negative		-	Negative		http://flybase.org/reports/FBgn0259210.html	http://www.omim.org/entry/604365	prominin (prom).
106139	CG5585	Rbbp5	Negative		-	Negative		-	Negative		http://flybase.org/reports/FBgn0036973.html	http://www.omim.org/entry/600697	Retinoblastoma binding protein 5 (Rbbp5).
105104	CG5469	Gint3	Negative		-	Negative		-	Negative		http://flybase.org/reports/FBgn0034372.html	http://www.omim.org/entry/611946	GDI interacting protein 3 (Gint3).
100780	CG6205	por	Negative		-	Negative		-	Negative		http://flybase.org/reports/FBgn0004957.html	http://www.omim.org/entry/300651	porcupine (por).
105407	CG6224	dbo	Negative		-	Negative		-	Negative		http://flybase.org/reports/FBgn0040230.html		diablo (dbo). Human kelch like family member 20 (KLHL20) ortholog. HGNC:25056.
110370	CG8340	128up	Negative		-	Negative		-	Negative		http://flybase.org/reports/FBgn0010339.html	http://www.omim.org/entry/603952	upstream of RpIII128 (128up).
102641	CG9602	Ubc87F	Negative		-	Negative		-	Negative		http://flybase.org/reports/FBgn0267383.html	http://www.omim.org/entry/601569	Ubiquitin conjugating enzyme 87F (Ubc87F).
109802	CG5547	Pect	Negative		-	Negative		-	Negative		http://flybase.org/reports/FBgn0032482.html	http://www.omim.org/entry/602679	Phosphoethanolamine cytidylyltransferase (Pect).
110807	CG5663	Dip-C	Negative		-	Negative		-	Negative		http://flybase.org/reports/FBgn0000455.html	http://www.omim.org/entry/613230	Dipeptidase C (Dip-C).
105469	CG7857	CG7857	Negative		-	Negative		-	Negative		http://flybase.org/reports/FBgn0026738.html	http://www.omim.org/entry/612021
107281	CG3961	CG3961	Negative		-	Negative		-	Negative		http://flybase.org/reports/FBgn0036821.html	http://www.omim.org/entry/605677
105432	CG17907	Ace	Negative		-	Negative		-	Negative		http://flybase.org/reports/FBgn0000024.html	http://www.omim.org/entry/100740	Acetylcholine esterase (Ace).
105847	CG12846	Tsp42Ed	Negative		-	Negative		-	Negative		http://flybase.org/reports/FBgn0029507.html	http://www.omim.org/entry/155740	Tetraspanin 42Ed (Tsp42Ed).
106496	CG3949	hoip	Negative		-	Negative		-	Negative		http://flybase.org/reports/FBgn0015393.html	http://www.omim.org/entry/601304	hoi-polloi (hoip).
106344	CG7843	Ars2	Negative		-	Negative		-	Negative		http://flybase.org/reports/FBgn0033062.html	http://www.omim.org/entry/614469	Arsenic resistance protein 2 (Ars2).
106521	CG8881	SkpB	Negative		-	Negative		-	Negative		http://flybase.org/reports/FBgn0026176.html	http://www.omim.org/entry/601434	SKP1-related B (SkpB).
106167	CG9313	CG9313	Negative		-	Negative		-	Negative		http://flybase.org/reports/FBgn0034566.html	http://www.omim.org/entry/604366
102518	CG10287	Gasp	Negative		-	Negative		-	Negative		http://flybase.org/reports/FBgn0026077.html		Gasp (Gasp). No human ortholog.
106517	CG33516	dpr3	Negative		-	Negative		-	Negative		http://flybase.org/reports/FBgn0053516.html		defective proboscis extension response 3 (dpr3).
110808	CG31132	BRWD3	Negative		-	Negative		-	Negative		http://flybase.org/reports/FBgn0011785.html	http://www.omim.org/entry/612870	BRWD3 (BRWD3). Pos for EGFR, no RT yet.
105152	CG15148	btv	Negative		-	Negative		-	Negative		http://flybase.org/reports/FBgn0023096.html	http://www.omim.org/entry/603297	beethoven (btv).
107000	CG42321	CG42321	Negative		-	Negative		-	Negative		http://flybase.org/reports/FBgn0259221.html	http://www.omim.org/entry/609542
106988	CG5792	Pih1D1			-	Negative		-	Negative		http://flybase.org/reports/FBgn0032455.html	http://www.omim.org/entry/611480	Pih1D1 (Pih1D1). not set with EGFR.
101977	CG33507	dpr2	Negative		-	Negative		-	Negative		http://flybase.org/reports/FBgn0261871.html		defective proboscis extension response 2 (dpr2).
101909	CG3857	CG3857	Negative		-	Negative		-	Negative		http://flybase.org/reports/FBgn0023520.html	http://www.omim.org/entry/613176
100819	CG8075	Vang	Negative		-	Positive		No	Negative		http://flybase.org/reports/FBgn0015838.html	http://www.omim.org/entry/600533	Van Gogh (Vang).
103047	CG30040	jeb	Negative		-	Negative		-	Negative		http://flybase.org/reports/FBgn0086677.html		jelly belly (jeb). No human ortholog.
105517	CG15007	Cpr64Ab	Negative		-	Negative		-	Negative		http://flybase.org/reports/FBgn0035511.html		Cuticular protein 64Ab (Cpr64Ab). No human ortholog.
104368	CG5634	dsd	Negative		-	Positive		No	Negative		http://flybase.org/reports/FBgn0039528.html	http://www.omim.org/entry/603130	distracted (dsd). Human attractin (ATRN) ortholog. HGNC:885.
108639	cg8823	Lip3			-			-	Negative		http://flybase.org/reports/FBgn0023495.html		not set with EGFR and Yki
100156	CG32255	Gr64f	Negative		-	Positive	http://www.iiserpune.ac.in/rnai/uploads/research/1913/images/dde82_100156_CG32255_Y.jpg	No	Negative		http://flybase.org/reports/FBgn0052255.html		Gustatory receptor 64f (Gr64f). No human ortholog.
100675	CG17385	CG17385	Negative		-	Positive	http://www.iiserpune.ac.in/rnai/uploads/research/1914/images/8387f_100675_CG17385_Y.jpg	No	Negative		http://flybase.org/reports/FBgn0033934.html
106048	CG9791	Suv3	Negative		-	Negative		-	Negative		http://flybase.org/reports/FBgn0037232.html	http://www.omim.org/entry/605122	Suv3 helicase (Suv3).
106725	CG13889	cep290	Negative		-	Positive	http://www.iiserpune.ac.in/rnai/uploads/research/1916/images/d51e4_106725_CG13889_B17J3_1.jpg	No	Negative		http://flybase.org/reports/FBgn0035168.html	http://www.omim.org/entry/610142	centrosomal protein 290 (cep290).
106737	CG10553	CG10553	Negative		-	Positive	http://www.iiserpune.ac.in/rnai/uploads/research/1917/images/86a38_106737_CG10553_Y.jpg	No	Negative		http://flybase.org/reports/FBgn0039324.html		No human ortholog.
110364	CG10648	Rbm13	Negative		-	Positive	http://www.iiserpune.ac.in/rnai/uploads/research/1918/images/282ac_110364_CG10648_Y.jpg	No	Negative		http://flybase.org/reports/FBgn0030067.html		RNA-binding motif protein 13 (Rbm13). Human MAK16 homolog (MAK16) ortholog. HGNC:13703.
103411	CG33106	mask	Negative		-	Positive	http://www.iiserpune.ac.in/rnai/uploads/research/1920/images/be858_103411_CG33106_MASK_Y.jpg	No	Negative		http://flybase.org/reports/FBgn0043884.html	http://www.omim.org/entry/615929	multiple ankyrin repeats single KH domain (mask).
104507	CG7391	Clk	Negative		-	Positive	http://www.iiserpune.ac.in/rnai/uploads/research/1921/images/84d0d_104507_CG7391_CLOCK_Y.jpg	No	Negative		http://flybase.org/reports/FBgn0023076.html	http://www.omim.org/entry/601851	Clock (Clk).
102046	CG4591	Tsp86D	Negative		-	Positive	http://www.iiserpune.ac.in/rnai/uploads/research/1922/images/8954d_102046_4591_TSP86D_Y.jpg	No	Negative		http://flybase.org/reports/FBgn0037848.html	http://www.omim.org/entry/610120	Tetraspanin 86D (Tsp86D).
101491	CG11699	CG11699	Negative		-	Positive	http://www.iiserpune.ac.in/rnai/uploads/research/1923/images/45345_YKI_101491.jpg	No	Negative		http://flybase.org/reports/FBgn0030311.html		Human transmembrane protein 242 (TMEM242) ortholog. HGNC:17206.
101444	CG5417	Srp14	Negative		-	Positive		No	Negative		http://flybase.org/reports/FBgn0038808.html	http://omim.org/entry/600708	Signal recognition particle protein 14 (Srp14).
108643	CG7128	Taf8	Negative		-	Negative		-	Negative		http://flybase.org/reports/FBgn0022724.html	http://omim.org/entry/609514	TBP-associated factor 8 (Taf8).
101441	CG1796	Tango4	Negative		-	Negative		-	Positive		http://flybase.org/reports/FBgn0030365.html	http://www.omim.org/entry/605961	Transport and Golgi organization 4 (Tango4).
101456	CG11027	Arf102F	Negative		-	Negative		-	Positive		http://flybase.org/reports/FBgn0013749.html	http://www.omim.org/entry/601177	ADP ribosylation factor at 102F (Arf102F).
109994	CG6090	RpL34a	Negative		-	Negative		-	Positive		http://flybase.org/reports/FBgn0039406.html	http://www.omim.org/entry/616862	Ribosomal protein L34a (RpL34a).
108558	CG1877	Cul1	Negative		-	Negative		-	Positive		http://flybase.org/reports/FBgn0015509.html	http://omim.org/entry/603134	Cullin 1 (Cul1).
101467	CG5378	Rpn7	Negative		-	Negative		-	Positive		http://flybase.org/reports/FBgn0028688.html		Regulatory particle non-ATPase 7 (Rpn7). Human proteasome 26S subunit, non-ATPase 6 (PSMD6) ortholog. HGNC:9564.
109058	CG33891	His4:CG33891	Negative		-	Negative		-	Positive		http://flybase.org/reports/FBgn0053871.html	http://www.omim.org/entry/602823	His4:CG33891 (His4:CG33891).
108821	CG3997	RpL39	Negative		-	Negative		-	Positive		http://flybase.org/reports/FBgn0023170.html	http://www.omim.org/entry/300899	Ribosomal protein L39 (RpL39).
106891	CG10374	Lsd-1	Negative		-	Negative		-	Positive		http://flybase.org/reports/FBgn0039114.html	http://www.omim.org/entry/602702	Lipid storage droplet-1 (Lsd-1).
103483	CG9750	rept	Negative		-	Negative		-	Positive		http://flybase.org/reports/FBgn0040075.html	http://omim.org/entry/604788	reptin (rept).
105279	CG10944	RpS6	Negative		-	Negative		-	Positive		http://flybase.org/reports/FBgn0261592.html	http://omim.org/entry/180460	Ribosomal protein S6 (RpS6).
106093	CG8977	CCT3	Negative		-	Negative		-	Positive		http://flybase.org/reports/FBgn0015019.html	http://omim.org/entry/600114	Chaperonin containing TCP1 subunit 3 (CCT3). Human Chaperonin containing TCP1 subunit 3 (CCT3) ortholog. HGNC:1616.
102627	CG4799	Pen	Negative		-	Negative		-	Negative		http://flybase.org/reports/FBgn0267727.html	http://www.omim.org/entry/600685	Pendulin (Pen).
101352	CG5048	CG5048	Negative		-	Negative		-	Negative		http://flybase.org/reports/FBgn0036437.html	http://www.omim.org/entry/300933
101411	CG6120	Tsp96F	Negative		-	Negative		-	Negative		http://flybase.org/reports/FBgn0027865.html	https://www.omim.org/entry/186845	Tetraspanin 96F (Tsp96F).
102505	CG31778	CG31778	Negative		-	Negative		-	Negative		http://flybase.org/reports/FBgn0051778.html	http://www.omim.org/entry/613201	Low DIOPT score.
101665	CG17988	Ance-3	Negative		-	Positive	http://www.iiserpune.ac.in/rnai/uploads/research/1943/images/16c78_Ance3-(KK101665-Yki).png	No	Negative		http://flybase.org/reports/FBgn0032536.html	https://www.omim.org/entry/106180	Angiotensin-converting enzyme 3 (Ance-3). Human angiotensin I converting enzyme (ACE) ortholog. HGNC:2707.
101571	CG4128	nAChRalpha6	Negative		-	Negative		-	Negative		http://flybase.org/reports/FBgn0032151.html	http://www.omim.org/entry/609756	Nicotinic Acetylcholine Receptor alpha 6 (nAChRalpha6).
101692	CG3858	gcm2	Negative		-	Negative		-	Negative		http://flybase.org/reports/FBgn0019809.html	http://omim.org/entry/603715	Glial cells missing 2 (gcm2).
106671	CG2904	ec	Negative		-	Negative		-	Negative		http://flybase.org/reports/FBgn0000542.html		echinus (ec). Human ubiquitin specific peptidase 53 (USP53) ortholog.
106102	CG9548	CG9548			-			-	Negative		http://flybase.org/reports/FBgn0031822.html
106081	CG5160	CG5160	Negative		-	Positive		No	Negative		http://flybase.org/reports/FBgn0031906.html		Human RAS like family 11 member B (RASL11B) ortholog. HGNC:23804.
106108	CG6629	CG6629	Negative		-	Negative		-	Negative		http://flybase.org/reports/FBgn0037860.html	http://www.omim.org/entry/602413
106090	CG3593	r-l			-	Negative		-	Negative		http://flybase.org/reports/FBgn0003257.html		rudimentary-like (r-l).
106112	CG13380	CG13380	Negative		-	Negative		-	Negative		http://flybase.org/reports/FBgn0036799.html		No human ortholog.
106324	CG9596	CG9596	Negative		-	Negative		-	Negative		http://flybase.org/reports/FBgn0031832.html		Human tRNA methyltransferase 6 (TRMT6) ortholog. HGNC:20900.
106115	CG14909	VhaM9.7-d	Negative		-	Positive	http://www.iiserpune.ac.in/rnai/uploads/research/1953/images/84e97_VhaM9.7-d-(KK106115-Yki).png	No	Negative		http://flybase.org/reports/FBgn0038458.html	http://www.omim.org/entry/603931	Vacuolar H+ ATPase M9.7 subunit d (VhaM9.7-d). Human ATPase H+ transporting V0 subunit e1 (ATP6V0E1) ortholog. HGNC:863.
106114	CG31142	CG31142	Negative		-	Negative		-	Negative		http://flybase.org/reports/FBgn0047114.html		No human ortholog.
106109	CG14507	CG14507			-			-	Negative		http://flybase.org/reports/FBgn0039655.html
106104	CG18348	Cpr67Fb	Negative		-	Negative		-	Negative		http://flybase.org/reports/FBgn0036110.html		No human ortholog.
106056	CG17559	dnt			-			-	Negative		http://flybase.org/reports/FBgn0024245.html		doughnut on 2 (dnt).
106070	CG14931	CG14931			-			-	Negative		http://flybase.org/reports/FBgn0032374.html
103616	CG8251	Pgi			-			-	Negative		http://flybase.org/reports/FBgn0003074.html		Phosphoglucose isomerase (Pgi).
106051	CG10061	Sas-4	Negative		-	Negative		-	Negative		http://flybase.org/reports/FBgn0011020.html	http://www.omim.org/entry/609279	Spindle assembly abnormal 4 ortholog (C. elegans) (Sas-4).
106107	CG1632	CG1632	Negative		-	Negative		-	Negative		http://flybase.org/reports/FBgn0030027.html	http://www.omim.org/entry/605236
106069	CG17230	CG17230			-			-	Negative		http://flybase.org/reports/FBgn0046225.html
106116	CG33647	CG33647			-			-	Negative		http://flybase.org/reports/FBgn0053647.html
106674	CG6405	CG6405			-			-	Negative		http://flybase.org/reports/FBgn0032428.html
106063	CG43365	BtbVII			-			-	Negative		http://flybase.org/reports/FBgn0263108.html		BTB-protein-VII (BtbVII).
106042	CG6369	Smg6	Negative		-	Negative		-	Negative		http://flybase.org/reports/FBgn0039260.html	http://www.omim.org/entry/610963	Smg6 (Smg6). Human SMG6, nonsense mediated mRNA decay factor (SMG6) ortholog. HGNC:17809.
106087	CG8616	BHD			-			-	Negative		http://flybase.org/reports/FBgn0261111.html		Birt-Hogg-Dube homolog (BHD).
106668	CG9485	CG9485			-			-	Negative		http://flybase.org/reports/FBgn0034618.html
106117	CG7443	CG7443	Negative		-	Positive	http://www.iiserpune.ac.in/rnai/uploads/research/1971/images/bc618_CG7443-(KK106117-Yki).png	No	Negative		http://flybase.org/reports/FBgn0037577.html		No human ortholog.
106686	CG8272	CG8272	Negative		-	Positive		No	Negative		http://flybase.org/reports/FBgn0033337.html		Human leucine rich repeat containing 29 (LRRC29) ortholog. HGNC:13605.
106798	CG32985	CG32985			-			-	Negative		http://flybase.org/reports/FBgn0052985.html
106688	CG5193	TfIIB	Negative		-	Negative		-	Negative		http://flybase.org/reports/FBgn0004915.html	http://www.omim.org/entry/189963	Transcription factor IIB (TfIIB).
106740	CG9129	CG9129	Negative		-	Positive		No	Negative		http://flybase.org/reports/FBgn0035196.html		No human ortholog.
105272	CG15022	CG15022	Negative		-	Negative		-	Negative		http://flybase.org/reports/FBgn0035547.html		No human ortholog.
106675	CG6938	CG6938			-			-	Negative		http://flybase.org/reports/FBgn0036235.html
106085	CG11168	CG11168			-			-	Negative		http://flybase.org/reports/FBgn0039249.html
106173	CG4995	CG4995			-			-	Negative		http://flybase.org/reports/FBgn0032219.html
106207	CG15094	MFS15			-			-	Negative		http://flybase.org/reports/FBgn0034392.html		Major Facilitator Superfamily Transporter 15 (MFS15).
106142	CG8817	lilli	Negative		-	Negative		-	Negative		http://flybase.org/reports/FBgn0041111.html		lilliputian (lilli).
106150	CG1031	alpha-Est1			-			-	Negative		http://flybase.org/reports/FBgn0015568.html		alpha-Esterase-1 (alpha-Est1).
106211	CG15530	CG15530			-			-	Negative		http://flybase.org/reports/FBgn0039752.html
106203	CG2103	pgant6			-			-	Negative		http://flybase.org/reports/FBgn0035375.html		polypeptide GalNAc transferase 6 (pgant6).
106192	CG5794	puf			-			-	Negative		http://flybase.org/reports/FBgn0039214.html		puffyeye (puf).
106074	CG1433	Atu	Negative		-	Negative		-	Negative		http://flybase.org/reports/FBgn0019637.html	http://www.omim.org/entry/610507	Another transcription unit (Atu).
106197	CG7600	CG7600	Negative		-	Negative		-	Negative		http://flybase.org/reports/FBgn0064766.html		Human family with sequence similarity 91 member A1 (FAM91A1) ortholog. HGNC:26306.
106058	CG10510	CG10510	Negative		-	Negative		-	Negative		http://flybase.org/reports/FBgn0037059.html	http://www.omim.org/entry/611088
106208	CG17239	CG17239			-			-	Negative		http://flybase.org/reports/FBgn0042186.html
106196	CG9576	Phf7	Negative		-	Positive		No	Negative		http://flybase.org/reports/FBgn0031091.html		PHD finger protein 7 ortholog (Phf7). Human PHD finger protein 7 (PHF7) ortholog. HGNC:18458.
106062	CG9376	CG9376	Negative		-	Negative		-	Negative		http://flybase.org/reports/FBgn0036893.html	http://www.omim.org/entry/600153
106228	CG7219	Spn28Dc			-			-	Negative		http://flybase.org/reports/FBgn0031973.html		Serpin 28Dc (Spn28Dc).
106209	CG18586	CG18586			-			-	Negative		http://flybase.org/reports/FBgn0035642.html
106128	CG15433	Elp3			-			-	Negative		http://flybase.org/reports/FBgn0031604.html		Elongator complex protein 3 (Elp3).
106064	CG10550	CG10550	Negative		-	Negative		-	Negative		http://flybase.org/reports/FBgn0039321.html		No human ortholog.
106143	CG12404	CG12404			-			-	Negative		http://flybase.org/reports/FBgn0032465.html
106145	CG7988	CG7988			-			-	Negative		http://flybase.org/reports/FBgn0038582.html
106137	CG12110	Pld	Negative		-	Positive		No	Negative		http://flybase.org/reports/FBgn0033075.html	http://www.omim.org/entry/602384	Phospholipase D (Pld).
106127	CG34414	spri	Negative		-	Positive	http://www.iiserpune.ac.in/rnai/uploads/research/2012/images/e6479_sprint-(KK106127-Yki).png	No	Negative		http://flybase.org/reports/FBgn0085443.html	http://www.omim.org/entry/610222	sprint (spri). Human Ras and Rab interactor 2 (RIN2) ortholog. HGNC:18750.
104658	CG10352	CG10352	Negative		-	Negative		-	Negative		http://flybase.org/reports/FBgn0030348.html	http://www.omim.org/entry/172280
106135	CG9361	Task7	Negative		-	Negative		-	Negative		http://flybase.org/reports/FBgn0037690.html	http://www.omim.org/entry/605874	TWIK-related acid-sensitive K+ channel 7 (Task7).
106193	CG7639	CG7639			-			-	Negative		http://flybase.org/reports/FBgn0033989.html
106234	CG32628	NnaD			-			-	Negative		http://flybase.org/reports/FBgn0265726.html		Drosophila Nna1 ortholog (NnaD).
110612	CG3125	IntS6			-			-	Negative		http://flybase.org/reports/FBgn0261383.html		Integrator 6 (IntS6).
110399	CG3160	CG3160			-			-	Negative		http://flybase.org/reports/FBgn0029789.html
110403	CG14620	tilB	Negative		-	Positive	http://www.iiserpune.ac.in/rnai/uploads/research/2025/images/7b070_tilB-(KK110403-Yki).png	No	Negative		http://flybase.org/reports/FBgn0014395.html	http://www.omim.org/entry/614930	touch insensitive larva B (tilB). Generally low phenotypic penetrance. Human leucine rich repeat containing 6 (LRRC6) ortholog. HGNC:16725.
106153	CG2914	Ets21C			-			-	Negative		http://flybase.org/reports/FBgn0005660.html		Ets at 21C (Ets21C).
106144	CG6094	CG6094			-			-	Negative		http://flybase.org/reports/FBgn0032261.html
106218	CG11778	CNT1	Negative		-	Negative		-	Negative		http://flybase.org/reports/FBgn0033371.html	http://www.omim.org/entry/606208	Concentrative Nucleoside Transporter 1 (CNT1).
106184	CG11526	Strip			-			-	Negative		http://flybase.org/reports/FBgn0035437.html		Striatin interacting protein ortholog (Strip).
106073	CG15080	CG15080	Negative		-	Negative		-	Negative		http://flybase.org/reports/FBgn0034391.html
106164	CG33308	CG33308	Negative		-	Negative		-	Negative		http://flybase.org/reports/FBgn0250834.html		No human ortholog.
106224	CG2617	CG2617	Negative		-	Positive		No	Negative		http://flybase.org/reports/FBgn0032877.html	http://www.omim.org/entry/606130	Human ring finger protein 26 (RNF26) ortholog. HGNC:14646.
106180	CG10417	CG10417			-			-	Negative		http://flybase.org/reports/FBgn0033021.html
106084	CG32397	jv			-			-	Negative		http://flybase.org/reports/FBgn0263973.html		javelin (jv).
106223	CG2993	CG2993			-			-	Negative		http://flybase.org/reports/FBgn0037521.html
106106	CG17350	CG17350			-			-	Negative		http://flybase.org/reports/FBgn0032772.html
106151	CG31413	CG31413	Negative		-	Negative		-	Negative		http://flybase.org/reports/FBgn0051413.html	http://www.omim.org/entry/612860	Human quiescin sulfhydryl oxidase 2 (QSOX2) ortholog. HGNC:30249.
101679	CG9722	CG9722			-			-	Negative		http://flybase.org/reports/FBgn0038209.html
101382	CG6022	Cchl			-			-	Negative		http://flybase.org/reports/FBgn0038925.html		Cytochrome c heme lyase (Cchl).
101437	CG5725	fbl			-			-	Negative		http://flybase.org/reports/FBgn0011205.html		fumble (fbl).
101381	CG31715	CG31715	Negative		-	Negative		-	Negative		http://flybase.org/reports/FBgn0051715.html	http://www.omim.org/entry/606484
101517	CG16973	msn			-			-	Negative		http://flybase.org/reports/FBgn0010909.html		misshapen (msn).
101438	CG4027	Act5C	Negative		-	Negative		-	Negative		http://flybase.org/reports/FBgn0000042.html	http://www.omim.org/entry/102630	Actin 5C (Act5C).
101556	CG6196	Trs33			-			-	Negative		http://flybase.org/reports/FBgn0266722.html		TRAPP subunit 33 ortholog (S. cerevisiae) (Trs33).
101379	CG18803	Psn			-			-	Negative		http://flybase.org/reports/FBgn0019947.html	http://www.omim.org/entry/600759	Presenilin (Psn).
101391	CG10652	RpL30			-			-	Negative		http://flybase.org/reports/FBgn0086710.html		Ribosomal protein L30 (RpL30).
101429	CG4572	CG4572			-			-	Negative		http://flybase.org/reports/FBgn0038738.html
101682	CG42642	Ir75c			-			-	Negative		http://flybase.org/reports/FBgn0261401.html		Ionotropic receptor 75c (Ir75c).
101408	CG18177	Naa60			-			-	Negative		http://flybase.org/reports/FBgn0036039.html		N(alpha)-acetyltransferase 60 (Naa60).
101419	CG1983	CG1983			-			-	Negative		http://flybase.org/reports/FBgn0039751.html
101514	CG32698	CG32698			-			-	Negative		http://flybase.org/reports/FBgn0052698.html
101366	CG13969	bwa	Negative		-	Positive		No	Negative		http://flybase.org/reports/FBgn0045064.html	http://www.omim.org/entry/613492	brain washing (bwa).
101426	CG4080	CG4080			-			-	Negative		http://flybase.org/reports/FBgn0035983.html
101416	CG5274	CG5274			-			-	Negative		http://flybase.org/reports/FBgn0036987.html
101633	CG8916	CG8916			-			-	Negative		http://flybase.org/reports/FBgn0030707.html
101425	CG5280	CG5280			-			-	Negative		http://flybase.org/reports/FBgn0035952.html
101534	CG7260	byn			-			-	Negative		http://flybase.org/reports/FBgn0011723.html		brachyenteron (byn).
101548	CG10128	tra2			-			-	Negative		http://flybase.org/reports/FBgn0003742.html		transformer 2 (tra2).
101385	CG9762	ND-SGDH			-			-	Negative		http://flybase.org/reports/FBgn0011455.html		NADH dehydrogenase (ubiquinone) SGDH subunit (ND-SGDH).
101345	CG1216	mri			-			-	Negative		http://flybase.org/reports/FBgn0035107.html		mrityu (mri).
101344	CG9865	PIG-M	Negative		-	Positive	http://www.iiserpune.ac.in/rnai/uploads/research/2071/images/c5177_PIG-M-(KK101344-Yki).png	No	Negative		http://flybase.org/reports/FBgn0034649.html	http://www.omim.org/entry/610273	Phosphatidylinositol glycan anchor biosynthesis class M (PIG-M). Human phosphatidylinositol glycan anchor biosynthesis class M (PIGM) ortholog. HGNC:18858.
106152	CG6602	CG6602			-			-	Negative		http://flybase.org/reports/FBgn0035673.html
101400	CG5484	CG5484			-			-	Negative		http://flybase.org/reports/FBgn0039450.html
101412	CG3151	Rbp9	Negative		-	Negative		-	Negative		http://flybase.org/reports/FBgn0010263.html	http://www.omim.org/entry/168360	RNA-binding protein 9 (Rbp9).
101643	CG10175	CG10175			-			-	Negative		http://flybase.org/reports/FBgn0039084.html
101664	CG33289	ppk5			-			-	Negative		http://flybase.org/reports/FBgn0053289.html		pickpocket 5 (ppk5).
101349	CG1728	Tim8			-			-	Negative		http://flybase.org/reports/FBgn0027359.html		Tim8 (Tim8).
110541	CG13663	CG13663	Negative		-	Positive		No	Negative		http://flybase.org/reports/FBgn0039291.html		Human SAYSVFN motif domain containing 1 (SAYSD1) ortholog. HGNC:21025.
101519	CG3104	CG3104			-			-	Negative		http://flybase.org/reports/FBgn0031473.html
101322	CG5339	CG5339			-			-	Negative		http://flybase.org/reports/FBgn0034925.html
101304	CG33484	zormin			-			-	Negative		http://flybase.org/reports/FBgn0052311.html		zormin (zormin).
101298	CG9681	PGRP-SB1			-			-	Negative		http://flybase.org/reports/FBgn0043578.html		PGRP-SB1 (PGRP-SB1).
101348	CG8111	CG8111	Negative		-	Negative		-	Negative		http://flybase.org/reports/FBgn0035825.html	http://www.omim.org/entry/612048
101330	CG34410	Rab26			-			-	Negative		http://flybase.org/reports/FBgn0086913.html		Rab26 (Rab26).
101296	CG33957	Plp	Negative		-	Negative		-	Negative		http://flybase.org/reports/FBgn0086690.html	http://www.omim.org/entry/605925	Pericentrin-like protein (Plp).
101314	CG13598	sba			-			-	Negative		http://flybase.org/reports/FBgn0016754.html		six-banded (sba).
101305	CG30369	CG30369			-			-	Negative		http://flybase.org/reports/FBgn0050369.html
101362	CG8609	MED4			-			-	Negative		http://flybase.org/reports/FBgn0035754.html		Mediator complex subunit 4 (MED4).
101436	CG14577	ORMDL			-			-	Negative		http://flybase.org/reports/FBgn0037110.html		ORMDL (ORMDL).
101301	CG4714	CG4714			-			-	Negative		http://flybase.org/reports/FBgn0033819.html
101302	CG13842	CG13842	Negative		-	Negative		-	Negative		http://flybase.org/reports/FBgn0039009.html		Human coiled-coil domain containing 142 (CCDC142) ortholog.
101360	CG10723	Kua			-			-	Negative		http://flybase.org/reports/FBgn0032850.html		Kua (Kua).
101471	CG30476	ave			-			-	Negative		http://flybase.org/reports/FBgn0050476.html		aveugle (ave).
101472	CG8922	RpS5a			-			-	Negative		http://flybase.org/reports/FBgn0002590.html		Ribosomal protein S5a (RpS5a).
101486	CG34360	Glut4EF			-			-	Negative		http://flybase.org/reports/FBgn0267336.html		Glut4EF (Glut4EF).
101610	CG18788	CG18788			-			-	Negative		http://flybase.org/reports/FBgn0042126.html
101629	CG32236	CG32236			-			-	Negative		http://flybase.org/reports/FBgn0046793.html
101482	CG32230	ND-MLRQ	Positive		No			-	Negative		http://flybase.org/reports/FBgn0052230.html	http://www.omim.org/entry/603833	NADH dehydrogenase (ubiquinone) MLRQ subunit (ND-MLRQ). EGFR-pos, no RT yet.
101447	CG15387	CG15387			-			-	Negative		http://flybase.org/reports/FBgn0031403.html
101570	CG8489	soti	Negative		-	Negative		-	Negative		http://flybase.org/reports/FBgn0038225.html		scotti (soti). No human ortholog.
103937	CG9531	CG9531			-			-	Negative		http://flybase.org/reports/FBgn0031817.html
102613	CG13270	Ugt36Ba	Negative		-	Negative		-	Negative		http://flybase.org/reports/FBgn0040262.html	http://www.omim.org/entry/606428	Ugt36Ba (Ugt36Ba).
101582	CG4597	CG4597	Negative		-	Positive		No	Negative		http://flybase.org/reports/FBgn0035594.html		No human ortholog.
103980	CG3221	dgt3	Negative		-			-	Negative		http://flybase.org/reports/FBgn0034569.html		dim gamma-tubulin 3 (dgt3). No human ortholog. Yki-pos, no RT yet.
103947	CG7402	CG7402	Negative		-	Negative		-	Negative		http://flybase.org/reports/FBgn0036768.html	http://www.omim.org/entry/611542
101567	CG10328	nonA-l	Negative		-	Negative		-	Negative		http://flybase.org/reports/FBgn0015520.html	https://www.omim.org/entry/605199	nonA-like (nonA-l).
101562	CG12516	CG12516			-			-	Negative		http://flybase.org/reports/FBgn0039577.html
103914	CG1768	dia	Negative		-	Negative		-	Negative		http://flybase.org/reports/FBgn0011202.html	http://www.omim.org/entry/300108	diaphanous (dia). SOCS: Reduced wing discs size.
101660	CG30037	CG30037			-			-	Negative		http://flybase.org/reports/FBgn0050037.html
103983	CG14400	CG14400			-			-	Negative		http://flybase.org/reports/FBgn0032896.html
110539	CG12245	gcm			-			-	Negative		http://flybase.org/reports/FBgn0014179.html		glial cells missing (gcm).
103911	CG2875	CG2875			-			-	Negative		http://flybase.org/reports/FBgn0029672.html
100721	CG11326	Tsp			-			-	Negative		http://flybase.org/reports/FBgn0031850.html		Thrombospondin (Tsp).
101585	CG42319	CG42319			-			-	Negative		http://flybase.org/reports/FBgn0259219.html
101584	CG17632	bw			-			-	Negative		http://flybase.org/reports/FBgn0000241.html		brown (bw).
103986	CG42589	sick			-			-	Negative		http://flybase.org/reports/FBgn0263873.html		sickie (sick).
101573	CG1889	CG1889			-			-	Negative		http://flybase.org/reports/FBgn0030164.html
110519	CG33523	Vap-33B			-			-	Negative		http://flybase.org/reports/FBgn0053523.html		VAMP-associated protein of 33kDa ortholog B (Vap-33B).
101667	CG12304	AIMP2	Negative		-	Negative		-	Negative		http://flybase.org/reports/FBgn0036515.html	http://www.omim.org/entry/600859	aaRS-interacting multifunctional protein 2 (AIMP2).
101603	CG8329	CG8329			-			-	Negative		http://flybase.org/reports/FBgn0036022.html
101642	CG7100	CadN	Negative		-	Negative		-	Negative		http://flybase.org/reports/FBgn0015609.html	https://www.omim.org/entry/605516	Cadherin-N (CadN).
101605	CG12011	CG12011			-			-	Negative		http://flybase.org/reports/FBgn0035257.html
103941	CG11537	CG11537	Negative		-	Negative		-	Negative		http://flybase.org/reports/FBgn0035400.html		Human major facilitator superfamily domain containing 14A (MFSD14A) ortholog. HGNC:23363.
103987	CG42388	CG42388			-			-	Negative		http://flybase.org/reports/FBgn0259734.html
103949	CG6352	OdsH			-			-	Negative		http://flybase.org/reports/FBgn0026058.html		Ods-site homeobox (OdsH).
101599	CG10163	CG10163			-			-	Negative		http://flybase.org/reports/FBgn0035697.html
103991	CG42336	CG42336	Negative		-	Positive		No	Negative		http://flybase.org/reports/FBgn0259238.html		No human ortholog.
101572	CG11896	m-cup	Negative		-	Negative		-	Negative		http://flybase.org/reports/FBgn0038488.html	https://www.omim.org/entry/608767	mann-cup (m-cup). Human fem-1 homolog C (FEM1C) ortholog. HGNC:16933.
101602	CG17267	CG17267			-			-	Negative		http://flybase.org/reports/FBgn0038821.html
100725	CG15814	CG15814			-			-	Negative		http://flybase.org/reports/FBgn0030873.html
103918	CG8257	CG8257			-			-	Negative		http://flybase.org/reports/FBgn0033900.html
103956	CG15096	CG15096	Negative		-	Negative		-	Negative		http://flybase.org/reports/FBgn0034394.html	http://www.omim.org/entry/604322
101674	CG5910	CG5910	Negative		-	Negative		-	Negative		http://flybase.org/reports/FBgn0036993.html		No human ortholog.
109826	CG11310	Cpr78Ca	Negative		-	Positive	http://www.iiserpune.ac.in/rnai/uploads/research/2312/images/97079_Cpr78Ca-(KK109826-Yki).png	No	Negative		http://flybase.org/reports/FBgn0037067.html		Cuticular protein 78Ca (Cpr78Ca). No human ortholog.
103925	CG6812	CG6812			-			-	Negative		http://flybase.org/reports/FBgn0036843.html
101627	CG33631	CG33631			-			-	Negative		http://flybase.org/reports/FBgn0053631.html
101675	CG2116	CG2116	Negative		-	Positive		No	Negative		http://flybase.org/reports/FBgn0030003.html
101566	CG12374	CG12374	Negative		-	Negative		-	Negative		http://flybase.org/reports/FBgn0033774.html	http://www.omim.org/entry/114852
101681	CG17226	Or59c			-			-	Negative		http://flybase.org/reports/FBgn0034866.html		Odorant receptor 59c (Or59c).
101617	CG17658	CG17658			-			-	Negative		http://flybase.org/reports/FBgn0034924.html
103954	CG33151	Gr59e			-			-	Negative		http://flybase.org/reports/FBgn0041233.html		Gustatory receptor 59e (Gr59e).
101597	CG18746	CG18746			-			-	Negative		http://flybase.org/reports/FBgn0042103.html
103950	CG4743	CG4743			-			-	Negative		http://flybase.org/reports/FBgn0039357.html
103952	CG14414	CG14414	Negative		-	Negative		-	Negative		http://flybase.org/reports/FBgn0030571.html		Human RNA binding motif protein 18 (RBM18). HGNC:28413.
101606	CG8910	CG8910			-			-	Negative		http://flybase.org/reports/FBgn0025833.html
103963	CG12307	CG12307			-			-	Negative		http://flybase.org/reports/FBgn0032370.html
101671	CG1257	alpha-Est3			-			-	Negative		http://flybase.org/reports/FBgn0015571.html		alpha-Esterase-3 (alpha-Est3).
103936	CG11899	CG11899	Positive		No	Negative		-	Negative		http://flybase.org/reports/FBgn0014427.html	http://www.omim.org/entry/610936
101363	CG1507	Pur-alpha	Negative		-	Negative		-	Negative		http://flybase.org/reports/FBgn0022361.html	http://www.omim.org/entry/600473	Purine-rich binding protein-alpha (Pur-alpha).
101448	CG9154	CG9154	Negative		-	Negative		-	Negative		http://flybase.org/reports/FBgn0031777.html		Human EEF1A lysine methyltransferase 1 (EEF1AKMT1) ortholog. HGNC:27351.
101295	CG5335	CG5335	Negative		-	Negative		-	Negative		http://flybase.org/reports/FBgn0034365.html	http://www.omim.org/entry/606099
101484	CG8421	Asph	Negative		-	Negative		-	Negative		http://flybase.org/reports/FBgn0034075.html	http://www.omim.org/entry/600582	Aspartyl beta-hydroxylase (Asph).
101399	CG9755	pum	Negative		-	Negative		-	Negative		http://flybase.org/reports/FBgn0003165.html	http://www.omim.org/entry/607205	pumilio (pum).
101406	CG5643	wdb	Negative		-	Negative		-	Negative		http://flybase.org/reports/FBgn0027492.html	http://www.omim.org/entry/601647	widerborst (wdb).
101469	CG32442	Arv1	Negative		-	Negative		-	Negative		http://flybase.org/reports/FBgn0052442.html	http://www.omim.org/entry/611647	ACAT-related protein required for viability 1 (Arv1).
101326	CG30390	Sgf29	Negative		-	Negative		-	Negative		http://flybase.org/reports/FBgn0050390.html	http://www.omim.org/entry/613374	SAGA-associated factor 29kDa (Sgf29).
101464	CG2256	CG2256	Negative		-	Negative		-	Negative		http://flybase.org/reports/FBgn0029995.html		Human EF-hand calcium binding domain 1 (EFCAB1) ortholog. HGNC:25678.
101474	CG9236	Cib2	Negative		-	Negative		-	Negative		http://flybase.org/reports/FBgn0034558.html	http://www.omim.org/entry/605564	Calcium and integrin binding family member 2 (Cib2).
101427	CG16799	CG16799	Negative		-	Negative		-	Negative		http://flybase.org/reports/FBgn0034538.html		Human lysozyme like 1 (LYZL1) ortholog. HGNC:30502.
101641	CG4770	CG4770	Negative		-	Negative		-	Negative		http://flybase.org/reports/FBgn0038751.html	http://www.omim.org/entry/616107
101321	CG33126	NLaz	Negative		-	Negative		-	Negative		http://flybase.org/reports/FBgn0053126.html	http://www.omim.org/entry/107740	Neural Lazarillo (NLaz).
101325	CG12212	peb	Negative		-	Negative		-	Negative		http://flybase.org/reports/FBgn0003053.html	http://omim.org/entry/602209	pebbled (peb).
101353	CG6878	CG6878	Negative		-	Negative		-	Negative		http://flybase.org/reports/FBgn0036488.html		Human reactive oxygen species modulator 1 (ROMO1) ortholog. HGNC:16185.
101424	CG11848	Bili	Negative		-	Negative		-	Negative		http://flybase.org/reports/FBgn0039282.html		Band4.1 inhibitor LRP interactor (Bili). Human FERM domain containing 8 (FRMD8) ortholog. HGNC:25462.
101492	CG13322	SCCRO3	Negative		-	Negative		-	Negative		http://flybase.org/reports/FBgn0033784.html	http://www.omim.org/entry/616167	Squamous cell carcinoma-related oncogene 3 ortholog (SCCRO3).
101397	CG11753	CG11753	Negative		-	Negative		-	Negative		http://flybase.org/reports/FBgn0037603.html	http://www.omim.org/entry/612979
101496	CG2098	FeCH	Negative		-	Negative		-	Negative		http://flybase.org/reports/FBgn0266268.html	http://www.omim.org/entry/612386	Ferrochelatase (FeCH).
101657	CG13970	CG13970	Negative		-	Negative		-	Negative		http://flybase.org/reports/FBgn0032851.html		No human ortholog.
101504	CG8732	Acsl	Negative		-	Negative		-	Negative		http://flybase.org/reports/FBgn0263120.html	http://www.omim.org/entry/300157	Acyl-CoA synthetase long-chain (Acsl).
101607	CG33286	CG33286	Negative		-	Negative		-	Negative		http://flybase.org/reports/FBgn0053286.html	http://www.omim.org/entry/616906
101654	CG12015	RabX6	Negative		-	Negative		-	Negative		http://flybase.org/reports/FBgn0035155.html		RabX6 (RabX6).
101546	CG9267	CG9267	Negative		-	Negative		-	Negative		http://flybase.org/reports/FBgn0032524.html	http://www.omim.org/entry/615940
101626	CG30268	CG30268	Negative		-	Positive	http://www.iiserpune.ac.in/rnai/uploads/research/2199/images/029d6_CG30268-(KK101626-Yki).png	No	Negative		http://flybase.org/reports/FBgn0050268.html		Human cilia and flagella associated protein 61 (CFAP61) ortholog. HGNC:15872.
101500	CG10847	enc	Negative		-	Negative		-	Negative		http://flybase.org/reports/FBgn0004875.html	http://www.omim.org/entry/605488	enc (encore).
101661	CG11874	alpha-Man-Ib	Negative		-	Positive	http://www.iiserpune.ac.in/rnai/uploads/research/2201/images/3fefa_alpha-Man-Ib-(KK101661-Yki).png	No	Negative		http://flybase.org/reports/FBgn0039634.html	http://www.omim.org/entry/604346	alpha-Mannosidase class I b (alpha-Man-Ib). Human mannosidase alpha class 1B member 1 (MAN1B1) ortholog. HGNC:6823.
101653	CG5665	CG5665	Negative		-	Negative		-	Negative		http://flybase.org/reports/FBgn0036977.html	http://www.omim.org/entry/609252
101648	CG9570	CG9570	Negative		-	Negative		-	Negative		http://flybase.org/reports/FBgn0031085.html		No human ortholog.
101628	CG15883	Obp18a	Negative		-	Negative		-	Negative		http://flybase.org/reports/FBgn0030985.html		Odorant-binding protein 18a (Obp18a). No human ortholog.
105846	CG15578	CG15578	Negative		-	Negative		-	Negative		http://flybase.org/reports/FBgn0040905.html		No human ortholog.
107888	CG1794	Mmp2	Negative		-	Negative		-	Negative		http://flybase.org/reports/FBgn0033438.html	http://www.omim.org/entry/602261	Matrix metalloproteinase 2 (Mmp2).
107895	CG13308	CG13308	Negative		-	Negative		-	Negative		http://flybase.org/reports/FBgn0035932.html		No human ortholog.
107855	CG34349	stac	Negative		-	Negative		-	Negative		http://flybase.org/reports/FBgn0266719.html	http://www.omim.org/entry/608897	staccato (stac).
107891	CG9056	tay	Negative		-	Negative		-	Negative		http://flybase.org/reports/FBgn0260938.html	http://www.omim.org/entry/607270	tay bridge (tay)
107862	CG8343	CG8343	Negative		-	Negative		-	Negative		http://flybase.org/reports/FBgn0040502.html	http://www.omim.org/entry/151445
107873	CG30023	sprt	Negative		-	Negative		-	Negative		http://flybase.org/reports/FBgn0082585.html		sprite (sprt).
107884	CG14676	CG14676	Negative		-	Negative		-	Negative		http://flybase.org/reports/FBgn0037388.html		No human ortholog.
105770	CG10338	CG10338	Negative		-	Negative		-	Negative		http://flybase.org/reports/FBgn0032700.html		Human chromosome 16 open reading frame 58 (C16orf58) ortholog. HGNC:25848.
107894	CG6125	CG6125	Negative		-	Negative		-	Negative		http://flybase.org/reports/FBgn0038337.html	http://www.omim.org/entry/610117
107848	CG10177	CG10177	Negative		-	Negative		-	Negative		http://flybase.org/reports/FBgn0039083.html	http://www.omim.org/entry/300121
107900	CG31975	CG31975	Negative		-	Negative		-	Negative		http://flybase.org/reports/FBgn0051975.html		No human ortholog.
107903	CG10486	CG10486	Negative		-	Negative		-	Negative		http://flybase.org/reports/FBgn0035647.html
107859	CG12917	CG12917	Negative		-	Negative		-	Negative		http://flybase.org/reports/FBgn0033490.html	http://www.omim.org/entry/600440
107864	CG9068	CG9068	Negative		-	Negative		-	Negative		http://flybase.org/reports/FBgn0034106.html
105717	CG6534	slou	Negative		-	Negative		-	Negative		http://flybase.org/reports/FBgn0002941.html		slouch (slou). Human NK1 homeobox 1 (NKX1-1) ortholog. HGNC:24975.
107861	CG17198	CG17198	Negative		-	Negative		-	Negative		http://flybase.org/reports/FBgn0039366.html		Human zinc finger DHHC-type containing 24 (ZDHHC24) ortholog. HGNC:27387.
107849	CG8584	CG8584	Negative		-	Negative		-	Negative		http://flybase.org/reports/FBgn0033322.html	http://www.omim.org/entry/610684
105748	CG42403	Ca-beta	Negative		-	Negative		-	Negative		http://flybase.org/reports/FBgn0259822.html	http://www.omim.org/entry/114207	Ca2+-channel-protein-beta-subunit (Ca-beta).
105726	CG9231	CG9231	Negative		-	Negative		-	Negative		http://flybase.org/reports/FBgn0036887.html	http://www.omim.org/entry/608017
107865	CG13137	CG13137	Negative		-	Negative		-	Negative		http://flybase.org/reports/FBgn0032188.html	http://www.omim.org/entry/605378
107887	CG7102	CG7102	Negative		-	Negative		-	Negative		http://flybase.org/reports/FBgn0031961.html		Human BTB domain containing 19 (BTBD19) ortholog. HGNC:27145.
105712	CG3422	Prosalpha4	Negative		-	Negative		-	Negative		http://flybase.org/reports/FBgn0004066.html		Proteasome alpha 4 subunit (Prosalpha4). Human proteasome subunit alpha 8 (PSMA8) ortholog. HGNC:22985.
107232	CG12715	CG12715	Negative		-	Negative		-	Negative		http://flybase.org/reports/FBgn0030443.html		No human ortholog.
104473	CG1078	Fip1	Negative		-	Negative		-	Negative		http://flybase.org/reports/FBgn0037255.html	http://www.omim.org/entry/607686	Factor interacting with poly(A) polymerase 1 (Fip1).
107839	CG14650	CG14650	Negative		-	Negative		-	Negative		http://flybase.org/reports/FBgn0037252.html	http://www.omim.org/entry/606092
105755	CG4276	arouser	Negative		-	Negative		-	Negative		http://flybase.org/reports/FBgn0029095.html	http://www.omim.org/entry/614988	arouser (aru).
107254	CG3410	lectin-24A	Negative		-	Negative		-	Negative		http://flybase.org/reports/FBgn0040104.html	http://www.omim.org/entry/178630	lectin-24A (lectin-24A).
[truncated: 7,074 more rows]
